# Supplementary material for: Road traffic injury mortality and its mechanisms in India: nationally representative mortality survey of 1.1 million homes
Source: PubMed Central journal article supplement — BMJ Open. 2013 Aug 17;3(8):e002621. doi: 10.1136/bmjopen-2013-002621 (PMC3753525; doi:10.1136/bmjopen-2013-002621), 2013-08-17
Supplement: bmjopen-2013-002621.draft_revisions.pdf [file bmjopen-2013-002621.draft_revisions.pdf]

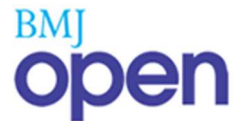

**Road traffic injury mortality and its mechanisms in India:  
nationally representative mortality survey of 1.1 million  
homes**

|                                                                                                                                                                                                                                                                                                                                              |                                                                                                                                                                                                                                                                                                                                                                                                                                                                                                                                                                                                                                                              |
|----------------------------------------------------------------------------------------------------------------------------------------------------------------------------------------------------------------------------------------------------------------------------------------------------------------------------------------------|--------------------------------------------------------------------------------------------------------------------------------------------------------------------------------------------------------------------------------------------------------------------------------------------------------------------------------------------------------------------------------------------------------------------------------------------------------------------------------------------------------------------------------------------------------------------------------------------------------------------------------------------------------------|
| Journal:                                                                                                                                                                                                                                                                                                                                     | <i>BMJ Open</i>                                                                                                                                                                                                                                                                                                                                                                                                                                                                                                                                                                                                                                              |
| Manuscript ID:                                                                                                                                                                                                                                                                                                                               | bmjopen-2013-002621                                                                                                                                                                                                                                                                                                                                                                                                                                                                                                                                                                                                                                          |
| Article Type:                                                                                                                                                                                                                                                                                                                                | Research                                                                                                                                                                                                                                                                                                                                                                                                                                                                                                                                                                                                                                                     |
| Date Submitted by the Author:                                                                                                                                                                                                                                                                                                                | 21-Jan-2013                                                                                                                                                                                                                                                                                                                                                                                                                                                                                                                                                                                                                                                  |
| Complete List of Authors:                                                                                                                                                                                                                                                                                                                    | Hsiao, Marvin; University of Toronto, Centre for Global Health Research; University of Toronto, Department of Surgery<br>Malhotra, Ajai; VCU Medical Center, Virginia Commonwealth University, Department of Surgery<br>Thakur, JS; Post Graduate Institute of Medical Education and Research, Department of Community Medicine<br>Sheth, Jay; Smt. N.H.L. Municipal Medical College,<br>Nathens, Avery; University of Toronto, Department of Surgery;<br>Sunnybrook Health Sciences Centre, Sunnybrook Research Institute<br>Dhingra, Neeraj; National AIDS Control Organization,<br>Jha, Prabhat; University of Toronto, Centre for Global Health Research |
| <b>Primary Subject Heading</b>:                                                                                                                                                                                                                                                                                                              | Epidemiology                                                                                                                                                                                                                                                                                                                                                                                                                                                                                                                                                                                                                                                 |
| Secondary Subject Heading:                                                                                                                                                                                                                                                                                                                   | Global health, Public health                                                                                                                                                                                                                                                                                                                                                                                                                                                                                                                                                                                                                                 |
| Keywords:                                                                                                                                                                                                                                                                                                                                    | road traffic injury, verbal autopsy, India, low- and middle-income countries                                                                                                                                                                                                                                                                                                                                                                                                                                                                                                                                                                                 |
| <p>Note: The following files were submitted by the author for peer review, but cannot be converted to PDF. You must view these files (e.g. movies) online.</p> <p>Figure 1 - v7.3 - 2013-01-21<br/>Figure 2 - v2.5 2013-01-21<br/>Figure 3 - Reported Injuries v5.1 2012-11-22<br/>STROBE_checklist_BMJ-Open_cross-sectional-studies.doc</p> |                                                                                                                                                                                                                                                                                                                                                                                                                                                                                                                                                                                                                                                              |

SCHOLARONE™  
Manuscripts

## Road traffic injury mortality and its mechanisms in India: nationally representative mortality survey of 1.1 million homes

Marvin Hsiao, Ajai Malhotra, JS Thakur, Jay K Sheth, Avery B Nathens, Neeraj Dhingra, Prabhat Jha, for the Million Death Study Collaborators.

Centre for Global Health Research, Li Ka Shing Knowledge Institute, St Michael's Hospital, University of Toronto, Toronto, Canada (M Hsiao MD, Prof P Jha DPhil); Division of General Surgery, Department of Surgery, University of Toronto, Toronto, Canada (M Hsiao MD, Prof AB Nathens MD); Department of Surgery, VCU Medical Center, Virginia Commonwealth University, Richmond, USA (Prof A Malhotra MD); Department of Community Medicine, Post Graduate Institute of Medical Education and Research, Chandigarh, India (JS Thakur MD); Smt. N.H.L. Municipal Medical College, Ahmedabad, India (JK Sheth MD); Sunnybrook Research Institute, Sunnybrook Health Sciences Centre, Toronto, Canada (Prof AB Nathens MD); National AIDS Control Organization, New Delhi, India (N Dhingra MD)

Correspondence to:

Marvin Hsiao

Centre for Global Health Research, Li Ka Shing Knowledge Institute, St Michael's Hospital, and Division of General Surgery, Department of Surgery, University of Toronto  
30 Bond Street, Toronto, Ontario, Canada M5B 1W8

[marvin.my.hsiao@gmail.com](mailto:marvin.my.hsiao@gmail.com)

+1 416-864-6042 (phone) / +1 416-864-5256 (fax)

Keywords: Road traffic injury; verbal autopsy; India; low- and middle-income countries

Word count: Text: 3211

**ABSTRACT:**

**Objectives:** To quantify and describe the mechanism of road traffic injury (RTI) deaths in India.

**Design:** We conducted a nationally representative mortality survey where at least two physicians coded each non-medical field staff's verbal autopsy reports. RTI mechanism data were extracted from the narrative section of these reports.

**Setting:** 1.1 million homes in India.

**Participants:** Over 122 000 deaths at all ages from 2001-2003.

**Primary and secondary outcome measures:** Age- and sex-specific mortality rates, place and timing of death, modes of transportation, and injuries sustained.

**Results:** The 2299 RTI deaths in the survey correspond to an estimated 183 600 RTI deaths or about 2% of all deaths in 2005 nationally, of which 65% occurred in males between the ages of 15-59 years. The age-adjusted mortality rate was greater in males than in females, in urban than in rural areas, and was notably higher than that estimated from national police records. Pedestrians (68 000), motorcyclists (36 000), and other vulnerable road users (20 000) constituted 68% of RTI deaths (124 000). The majority of all RTI deaths occurred at the scene of collision (1005/1733, 58%), within minutes of collision (883/1596, 55%), and/or involved a head injury (691/1124, 62%). Compared to non-pedestrian RTI deaths, about 55 000 (81%) of pedestrian deaths were associated with less education and living in poorer neighbourhoods.

**Conclusions:** In India, RTI cause a substantial number of deaths, particularly among pedestrians and other vulnerable road users. Interventions to prevent collisions and reduce injuries might address over half of the RTI deaths. Improved pre-hospital transport and hospital trauma care might address just over a third of the RTI deaths.

## ARTICLE SUMMARY

### Article focus

- To directly estimate the age- and sex-specific mortality rates and describe the place and timing of death, modes of transportation, and injuries sustained for road traffic injury (RTI) deaths in India using a nationally representative mortality survey of 1.1 million homes.

### Key messages

- Road traffic injuries cause a substantial number of avertable deaths, particularly in males of productive working age and among pedestrians and other vulnerable road users.
- Preventative interventions should be emphasized as the majority of all RTI deaths occurred at the scene of collision, within minutes of collision, and/or involved a head injury.
- Properly designed mortality survey with verbal autopsy narratives can provide much-needed data to assist RTI prevention efforts.

### Strengths and limitations of this study

- This study is the first nationally representative survey of the causes of death in India and overcomes limitations of existing data sources including regional injury surveys, hospital series, and national police reports.
- Limitations of the study include potential misclassification of deaths by physician coders, the use of layperson narratives with a potential for recall bias and inaccuracies, and limited ability to forward project study results given the rapid changes in motorization in India.

## INTRODUCTION

Road traffic injuries (RTI) are a large and growing public health burden, especially in low-and middle-income countries (LMIC) where 90% of the world's RTI deaths are estimated to occur.[1]

There are few high-quality epidemiologic data on RTI to guide the development, implementation, and surveillance of evidence-based policy and programs in LMICs.[2-4]

The number of RTI deaths in India is projected to rise with increasing motorization.[1,5] Aside from a few regional injury surveys,[6-11] the current data on the numbers and mechanisms of RTI deaths in India rely on police or hospital records, both of which can substantially underestimate death rates in the poor, rural, and uneducated people who still constitute large proportions of the Indian population.[2-4,12,13]

The World Health Organization (WHO), using indirect modeling methods, estimated about 202 000 RTI deaths in India in 2004.[14,15] No study has validated this estimate with direct measurement nor documented detailed RTI mechanism for India nationally. Here, we estimate the regional, age- and sex-specific mortality rate and risk of RTI death in India using data from the Million Death Study (MDS). We also report the modes of transportation, place and timing of death, and injuries sustained in RTI deaths.

## METHODS

**Study Design:** The MDS is an on-going nationally representative survey designed to determine the causes and risk factors of death in India, organized by the Registrar General of India (RGI). The design, methodology, and preliminary findings of the MDS have been described elsewhere.[16-19] In brief, the MDS used an enhanced version of verbal autopsy (known as the routine, reliable, representative, re-sampled household investigation of mortality with medical evaluation or RHIME) to monitor a nationally representative sample of 1.1 million households in the Sample Registration System (SRS). Within six months of every death occurring in these households from 2001-3, a trained, nonmedical RGI surveyor interviewed a relative or close-acquaintance of the deceased to obtain the symptoms and events around the death using structured questions and a local language narrative guided by a specific symptom list. These records were converted into electronic records and emailed to two of 140 trained physicians who, independently and anonymously, assigned an underlying cause of death (with allocation determined randomly based only on the physician's ability to read the local language), using guidelines for the major causes of death.[20] Records were assigned cause of death in three-digit International Classification of Diseases and Related Health Problems, 10th revision (ICD-10).[21] Records where coders disagreed on the cause of death underwent anonymous reconciliation. Continuing disagreements were adjudicated by a third senior physician. Five percent of households were randomly resurveyed and the results were consistent within families of ICD-10 codes.[16] Participation in the SRS is on a voluntary basis and oral consent was obtained under the confidentiality and consent procedures of the Registration of Births and Deaths Act, 1969.

**Road Traffic Injury Deaths:** The RTI deaths in this study were of people who died between 2001 and 2003 with a final assigned ICD-10 code within V01-V89. We translated the open-ended narratives into English from 14 local languages, and systematically extracted the modes

1  
2  
3 of transportation, place and timing of death, and injuries sustained from the narratives. For  
4 these four data elements, there were substantial inter-rater agreement (kappa statistic > 0.69)  
5 between two investigators and two research assistants who were trained and independently  
6 extracted data from the narratives of a random 10% of RTI deaths (data not shown). The two  
7 research assistants then independently extracted data from all narratives. Adjudication was  
8 done by an investigator (M.H) for discrepancies in extracted data.  
9  
10  
11  
12  
13  
14  
15  
16  
17

18 **Analysis:** The age and sex-specific proportion of RTI deaths within the 2001-2003 survey was  
19 applied to the 2005 United Nations (UN) estimates of the number of deaths from all causes in  
20 India, after weighting for sampling probability.[22] The 2005 UN death estimates were used so  
21 as to correct for the slight undercounts reported in the total death rates in the SRS[23,24] and to  
22 account for the 12% of enumerated deaths without completed field visits (mostly due to out-  
23 migration of the family or from incomplete field records). The proportion of these missed deaths  
24 was similarly dispersed across sex, age, and states. Use of 2003 or 2004 UN death totals  
25 yielded nearly identical results (data not shown). The 99% confidence intervals (99%CI) for  
26 mortality rate were calculated based on the weighted number of study deaths. State- and  
27 rural/urban-specific estimates of the number, mortality rate, and lifetime risk of RTI death were  
28 calculated by partitioning the UN national death totals according to relative SRS death rates as  
29 previously described.[18,25,26] Urban and rural status was defined according to the Census of  
30 India. Logistic regression was used to compare the socio-demographic traits of pedestrian and  
31 non-pedestrian RTI deaths. Household fuel type was used as a measure of community wealth:  
32 high asset neighbourhoods had >50% of households that used gas, electricity, or kerosene; low  
33 asset or poor neighbourhoods used primarily coal, firewood, or other. Attributable proportion  
34 was calculated for traits of pedestrian deaths compared to non-pedestrian RTI deaths.  
35  
36  
37  
38  
39  
40  
41  
42  
43  
44  
45  
46  
47  
48  
49  
50  
51  
52  
53  
54  
55  
56  
57  
58  
59  
60

1  
2  
3 The MDS received ethics approval from the review boards of the Post-Graduate Institute of  
4 Medical Education and Research in Chandigarh, India; St Michael's Hospital in Toronto,  
5 Canada; and the Indian Council of Medical Research's Health Ministry's Screening Committee.  
6  
7  
8  
9  
10  
11  
12  
13

## 14 RESULTS

15  
16 The 2299 RTI deaths in the 2001-2003 survey correspond to an estimated 183 600 (99%CI 173  
17 800-193 400) RTI deaths in India in 2005. The majority of these RTI deaths occurred in males  
18 (152 100 deaths, 82.8%; table 1). The age-standardized RTI mortality rate for males (26.2 per  
19 100 000, 24.6-27.7) was higher than for females (5.7 per 100 000, 5.0-6.4). While the RTI  
20 mortality rate increased with age in both genders, the largest number of RTI deaths occurred in  
21 males between 15-59 years of age (118 900, 64.8%).  
22  
23  
24  
25  
26  
27  
28  
29  
30

31 At these death rates and in the theoretical absence of other causes of death, males in India had  
32 a 2.1% (2.0-2.3) risk of dying from RTI before age 70, with the highest risks at ages 30-59  
33 years; females had a 0.5% (0.4-0.5) risk of dying from RTI before age 70. Males in Haryana,  
34 Punjab, Tamil Nadu, and Uttar Pradesh had significantly higher risks (3.0-4.1%) than the  
35 national risk (figure 1). In contrast, males in Bihar, Jharkhand, Andhra Pradesh, Orissa, Gujarat,  
36 and West Bengal had significantly lower risks (1.3-1.6%) than the national risk of RTI deaths.  
37 Males living in urban areas had slightly higher age-standardized mortality rates and risks of RTI  
38 deaths (27.6 per 100 000; 2.4%, 2.1-2.6) compared to males living in rural areas (24.9 per 100  
39 000; 2.0%, 1.8-2.1). By contrast, female RTI mortality rates and risks before age 70 varied much  
40 less across states and were similar in rural and urban areas (data not shown).  
41  
42  
43  
44  
45  
46  
47  
48  
49  
50  
51  
52  
53  
54  
55  
56  
57  
58  
59  
60



## Study deaths, 2001-2003

## All India, 2005

|                                            | Number of RTI deaths / all coded deaths | Proportion RTI* | Rural (%**) | Two coders immediately agree | All deaths / population (millions, 2005 UN estimates) | Estimated RTI deaths§, thousands | RTI death rateΨ per 100 000 (99% CI) | Period risk for RTI death† |
|--------------------------------------------|-----------------------------------------|-----------------|-------------|------------------------------|-------------------------------------------------------|----------------------------------|--------------------------------------|----------------------------|
| <b>Male - age in years</b>                 |                                         |                 |             |                              |                                                       |                                  |                                      |                            |
| 0-4                                        | 44 / 11719                              | 0.4%            | 37 (76.7)   | 44                           | 1.2 / 67                                              | 4.9                              | 7.4 (6.5-8.4)¶                       | 0.04%                      |
| 5-14                                       | 97 / 1926                               | 5.2%            | 86 (84.1)   | 87                           | 0.2 / 129                                             | 8.5                              | 6.6 (4.9-8.3)                        | 0.1%                       |
| 15-29                                      | 605 / 4727                              | 13.0%           | 462 (68.9)  | 558                          | 0.4 / 163                                             | 47.1                             | 28.9 (25.9-31.9)                     | 0.4%                       |
| 30-44                                      | 529 / 6817                              | 7.7%            | 385 (67.0)  | 477                          | 0.6 / 115                                             | 43.8                             | 37.9 (33.7-42.1)                     | 0.6%                       |
| 45-59                                      | 356 / 11731                             | 3.0%            | 249 (60.9)  | 312                          | 0.9 / 73                                              | 28.0                             | 38.4 (33.2-43.6)                     | 0.6%                       |
| 60-69                                      | 149 / 12120                             | 1.2%            | 117 (71.8)  | 133                          | 0.9 / 24                                              | 10.6                             | 44.0 (34.6-53.4)                     | 0.5%                       |
| >70                                        | 123 / 18732                             | 0.6%            | 106 (81.2)  | 98                           | 1.3 / 14                                              | 9.1                              | 64.5 (49.1-80.0)                     | --                         |
| All ages                                   | 1903 / 67772                            | 2.8%            | 1442 (68.9) | 1709                         | 5.3 / 585                                             | 152.1                            | 26.2                                 | 2.1%†                      |
| (% or 99% CI)                              |                                         |                 |             | (89.8%)                      |                                                       | (143.2-161.0)                    | (24.6-27.7)                          | (2.0-2.3)                  |
| <b>Female - age in years</b>               |                                         |                 |             |                              |                                                       |                                  |                                      |                            |
| 0-4                                        | 50 / 11492                              | 0.4%            | 46 (93.4)   | 45                           | 1.2 / 61                                              | 5.0                              | 8.1 (7.1-9.1)¶                       | 0.04%                      |
| 5-14                                       | 44 / 1955                               | 2.3%            | 38 (80.1)   | 43                           | 0.2 / 118                                             | 3.8                              | 3.2 (2.0-4.4)                        | 0.03%                      |
| 15-29                                      | 72 / 4394                               | 1.5%            | 53 (60.5)   | 63                           | 0.3 / 150                                             | 5.3                              | 3.5 (2.4-4.6)                        | 0.1%                       |
| 30-44                                      | 59 / 4055                               | 1.4%            | 39 (59.0)   | 50                           | 0.3 / 106                                             | 4.4                              | 4.1 (2.7-5.5)                        | 0.1%                       |
| 45-59                                      | 70 / 6402                               | 1.1%            | 55 (70.9)   | 61                           | 0.5 / 69                                              | 6.0                              | 8.6 (5.9-11.3)                       | 0.1%                       |
| 60-69                                      | 54 / 9016                               | 0.6%            | 42 (68.6)   | 52                           | 0.6 / 25                                              | 3.7                              | 14.8 (9.8-19.9)                      | 0.2%                       |
| >70                                        | 47 / 17343                              | 0.3%            | 33 (61.8)   | 35                           | 1.3 / 16                                              | 3.5                              | 21.6 (13.4-29.9)                     | --                         |
| All ages                                   | 396 / 54657                             | 0.7%            | 306 (69.8)  | 349                          | 4.5 / 546                                             | 31.5                             | 5.7                                  | 0.5%†                      |
| (% or 99% CI)                              |                                         |                 |             | (88.1%)                      |                                                       | (27.5-35.6)                      | (5.0-6.4)                            | (0.4-0.5)                  |
| <b>Total male and female, &lt;70 years</b> | 2129 / 86354                            | 2.4%            | 1609 (68.5) | 1925                         | 7.2 / 1100                                            | 171.0                            | 15.5                                 | 1.3%†                      |
| (% or 99% CI)                              |                                         |                 |             | (90.4%)                      |                                                       | (161.5-180.4)                    | (14.7-16.4)                          | (1.3-1.4)                  |
| <b>Total male and female, all ages</b>     | 2299 / 122429                           | 1.8%            | 1748 (69.0) | 2058                         | 9.8 / 1131                                            | 183.6                            | 16.2                                 | 1.3%†                      |
| (% or 99% CI)                              |                                         |                 |             | (89.5%)                      |                                                       | (173.8-193.4)                    | (15.4-17.1)                          | (1.3-1.4)                  |

**Table 1: Road traffic injury deaths in the present study and estimated national totals for 2005, by age and gender.** \*Proportion of RTI deaths compared to all deaths, weighted by state and residence (rural/urban). \*\*Percentage rural is weighted by state and residence (rural/urban). §Obtained by multiplying the United Nations estimated total deaths in 2005 by the weighted proportions. ΨAge standardized to the 2005 United Nations estimated Indian population; 99% CI shown are calculated based on weighted number of study deaths, which result in wider CI than those based on physician agreement. †Annual RTI death rate multiplied by the duration of age range, except for the lifetime risk which is calculated between 0-69 years by summation of the age specific period risks. ¶Crude death rate.

1  
2  
3 Vulnerable road users are those without a rigid barrier protecting against traumatic forces and  
4  
5 include pedestrians, motorcyclists, bicyclists, and three-wheelers. They constituted a majority  
6  
7 (68%; n=124 000, 99%CI 115 000-131 000) of RTI deaths, led by pedestrians (37%; n=68 000,  
8  
9 62 000-73 000) and motorcyclists (20%; n=36 000, 31 000-40 000) (figure 2). Drivers and  
10  
11 passengers of motorized four-wheelers comprised 16% (n=31 000, 27 000-35 000) of RTI  
12  
13 deaths. By contrast, the 2005 police reports, which use a different but compatible classification  
14  
15 system to ICD-10, recorded only 33 000 vulnerable road user deaths and only 9000 pedestrian  
16  
17 deaths. The most common types of vehicle to collide into the decedents were heavy transport  
18  
19 vehicles and buses (37%; n=68 000, 61 000-74 000), followed by cars and vans (15%; n=28  
20  
21 000, 24 000-32 000). Single-vehicle incidents comprised 9% of deaths (n=17 000, 14 000-20  
22  
23 000). The most frequent combinations, resulting in 23% (n=42 000, 37 000-47 000) of RTI  
24  
25 deaths, were collisions of heavy transport vehicles or buses with pedestrians and motorcyclists  
26  
27 (data not shown).  
28  
29  
30  
31  
32

33  
34 The place and timing of death were described in the narratives of 1733 (75%) and 1596 (69%)  
35  
36 of the RTI deaths respectively (figure 2; see supplementary table 1 for a summary of missing  
37  
38 data from the narratives with respect to deceased characteristics). For these narratives, only the  
39  
40 study proportion and not national estimates were made. Most RTI deaths occurred at the scene  
41  
42 of collision (58%, 1005/1733) or instantly, defined as within 5 minutes (55%, 883/1596). Only 3%  
43  
44 (45/1733) were labeled as potentially avertable with better pre-hospital transport as they  
45  
46 occurred on scene but not instantly. Another 35% of deaths occurred en route (7%, 124/1733) or  
47  
48 in hospital (28%, 481/1733).  
49  
50  
51  
52

53  
54 Injuries sustained by the deceased were reported from 1124 narratives (49%). Head injuries  
55  
56 were the most commonly reported (62%, 691/1124), of which 76% (524/691) were reported as  
57  
58 isolated head injuries (figure 3). A greater percentage of motorcyclists (78%, 188/241) had head  
59  
60

1  
2  
3 injuries reported compared to non-motorcyclists (57%, 457/807). After adjusting for age, sex,  
4 rural/urban, neighbourhood asset, and education, bicyclists and motorcyclists were more likely  
5 to have head injuries reported compared to non-vulnerable road users (adjusted OR 1.7, 1.2-  
6 2.5) (supplementary table 2).  
7  
8  
9  
10

11  
12  
13  
14 Compared to non-pedestrian RTI deaths, pedestrian deaths occurred to those who had less  
15 education (or in the case of children age <15 years, have less educated parents) (adjusted OR  
16 2.9, 99%CI 2.0-4.2), lived in poorer neighbourhoods (1.7, 1.1-2.5), were children or elderly  
17 adults (<15 years: 2.9, 1.8-4.5; >59 years: 1.7, 1.2-2.4), were female (1.5, 1.2-2.2), and lived in  
18 urban areas (1.5, 1.1-2.2) (table 2). If pedestrian deaths had the same proportion of secondary  
19 or higher education as non-pedestrian RTI deaths, there would be 406/825 (49%) fewer  
20 pedestrian deaths, corresponding to approximately 33 000 deaths nationally in 2005. The  
21 corresponding attributable proportion for living in richer versus poorer neighbourhoods would be  
22 265/825 (32%) or approximately 22 000 deaths nationally. Within the narratives we could code,  
23 there were no differences between pedestrians and non-pedestrian RTI deaths in timing of  
24 death, place of death, reported injuries, or reported routine use of alcohol or smoking (data not  
25 shown).  
26  
27  
28  
29  
30  
31  
32  
33  
34  
35  
36  
37  
38  
39  
40  
41  
42  
43  
44  
45  
46  
47  
48  
49  
50  
51  
52  
53  
54  
55  
56  
57  
58  
59  
60

|                                          | Pedestrian /<br>Non-Pedestrian<br>Total=825/1280 | Adjusted OR <sup>^</sup><br>(99% CI) | Attributable<br>Pedestrian Deaths<br>(% of all 825<br>pedestrian deaths) |
|------------------------------------------|--------------------------------------------------|--------------------------------------|--------------------------------------------------------------------------|
| <b>Education*</b>                        |                                                  |                                      |                                                                          |
| Secondary or higher                      | 112/382                                          | ref                                  |                                                                          |
| Primary or middle                        | 248/450                                          | 1.8 (1.3-2.6)                        | 110 } 406 (49%)                                                          |
| Below primary                            | 451/423                                          | 2.9 (2.0-4.2)                        |                                                                          |
| Unknown                                  | 14/25                                            | 1.6 (0.6-4.2)                        | N/A                                                                      |
| <b>Neighbourhood Asset</b>               |                                                  |                                      |                                                                          |
| High                                     | 137/320                                          | ref                                  |                                                                          |
| Low                                      | 643/895                                          | 1.7 (1.1-2.5)                        | 265 (32%)                                                                |
| Unknown                                  | 45/65                                            | 1.5 (0.8-2.8)                        | N/A                                                                      |
| <b>Age in years</b>                      |                                                  |                                      |                                                                          |
| 15-59 (driving ages)                     | 497/1046                                         | ref                                  |                                                                          |
| <15 (children)                           | 144/74                                           | 2.9 (1.8-4.5)                        | 94 } 170 (21%)                                                           |
| >59 (elderly adults)                     | 184/160                                          | 1.7 (1.2-2.4)                        |                                                                          |
| <b>Sex</b>                               |                                                  |                                      |                                                                          |
| Male                                     | 621/1121                                         | ref                                  |                                                                          |
| Female                                   | 204/159                                          | 1.5 (1.1-2.2)                        | 68 (8%)                                                                  |
| <b>Location</b>                          |                                                  |                                      |                                                                          |
| Rural                                    | 643/962                                          | ref                                  |                                                                          |
| Urban                                    | 182/318                                          | 1.5 (1.1-2.2)                        | 61 (7%)                                                                  |
| <b>Occupation</b>                        |                                                  |                                      |                                                                          |
| Salaried / Wage Earner / Professional    | 229/517                                          | ref                                  |                                                                          |
| Cultivator / Agricultural labour / Other | 162/300                                          | 0.9 (0.6-1.3)                        | N/A                                                                      |
| Non-worker / Children <15 years          | 433/463                                          | 1.2 (0.9-1.6)                        | N/A                                                                      |
| Unknown                                  | 1/0                                              | N/A                                  | N/A                                                                      |
| <b>Routine Alcohol Use**</b>             |                                                  |                                      |                                                                          |
| No                                       | 494/877                                          | ref                                  |                                                                          |
| Yes                                      | 145/260                                          | 1.1 (0.7-1.5)                        | N/A                                                                      |
| Unknown                                  | 42/69                                            | 1.0 (0.5-1.9)                        | N/A                                                                      |

**Table 2: Characteristics of pedestrian RTI deaths and attributable proportions.** \*Education of deceased adults or, in cases of deceased children <15 years, education of respondent. \*\*Excludes 218 children. ^Odds ratios are adjusted for all other variables in this table except for alcohol use; the odds ratios for alcohol use are adjusted for all other variables in this table.

## DISCUSSION

RTI is an important cause of death in India, causing 183 600 deaths in 2005, or about 2% of all deaths. Much of the deceased were men between ages 15-59 years. Males had a four-fold higher cumulative risk of RTI death compared to females before the age of 70. Among the major

1  
2  
3 states, there was approximately 3-fold variation in the age-standardized RTI death rate and  
4  
5 cumulative risk for males.  
6  
7

8  
9  
10 Our estimated number of RTI deaths is more than 50% greater than the 118 265 deaths  
11 reported in the official police statistics of the National Crime Records Bureau (NCRB) in  
12 2005.[27] Compared to our estimates, the extent of under-reporting of the crude death rate in  
13 major states by NCRB ranged from <1% to about 80% (supplementary table 3). Existing  
14 regional population-based injury surveys in India support our findings and also report higher  
15 crude RTI death rates than NCRB statistics.[8,11] Under-reporting of RTI deaths in police  
16 statistics has been reported in India and other LMIC.[28-30] A study in urban India comparing  
17 both hospital- and community-based RTI data to police records identified factors contributing to  
18 under-reporting that included the deceased believed to be at fault, collision resulting from hit-  
19 and-runs, limited police resources, and the lack of a standard police reporting protocol by  
20 hospitals.[28] The factors contributing to police under-reporting, especially in rural India, require  
21 further examination. Our estimated number of RTI deaths in 2005 was consistent with the WHO  
22 estimate for 2004.[14] However, we observed a slightly higher male proportion (83% MDS vs.  
23 77% WHO, all ages) and a higher proportion of male deaths between 15-59 years (65% MDS  
24 vs. 61% WHO).  
25  
26  
27  
28  
29  
30  
31  
32  
33  
34  
35  
36  
37  
38  
39  
40  
41  
42  
43  
44

45 Almost three-quarters of all RTI deaths in India were of pedestrians and other vulnerable road  
46 users. In contrast, a much lower proportion (27%) was reported by the NCRB (figure 2). This  
47 difference equated to 59 000 pedestrian and 32 000 other vulnerable road user deaths that were  
48 not included in the 2005 NCRB records. Existing RTI studies based on regional surveys and  
49 hospital series also reported a high proportion (>60%) of vulnerable road user deaths similar to  
50 our findings.[11,12,30-32] Since the majority of vulnerable road users were pedestrians, our  
51 findings suggested that RTI deaths in individuals who were less educated, poor, female or live in  
52  
53  
54  
55  
56  
57  
58  
59  
60

1  
2  
3 urban areas may have been disproportionately excluded from the NCRB records. While poverty  
4 and education are not likely to be in the direct causal pathway of pedestrian deaths, they  
5  
6 nonetheless point to other associated risk factors. Indeed, 55 000 pedestrian deaths in 2005  
7  
8 (81%) was associated with lower education or living in poorer neighbourhoods compared to non-  
9  
10 pedestrian RTI deaths. While the less educated and the poor likely travelled more often by foot,  
11  
12 they might also be exposed to undetermined environmental (neighbourhoods with unsafe  
13  
14 roads), biological (poor vision or decreased mobility due to poor health), and behavioral (alcohol  
15  
16 or other substance use) risk factors for pedestrian death.[12,33,34] Further studies are needed  
17  
18 to better understand pedestrian deaths in LMIC.  
19  
20  
21  
22  
23

24  
25 Over half of RTI deaths occurred instantly at the scene of collision and/or had head injury  
26  
27 reported. Thus, investments in primary and secondary prevention could potentially avert the  
28  
29 greatest proportion of RTI deaths. To address the high proportion of instant deaths and head  
30  
31 injuries among RTI deaths in India, specific interventions that are effective and based on studies  
32  
33 in LMIC should be emphasized; these may include speed bumps, motorcycle helmets, and  
34  
35 increasing fines and license suspensions for rule infractions.[33] In contrast, improving pre-  
36  
37 hospital transport and hospital trauma care, could only potentially affect the 38% who died on  
38  
39 scene with delayed hospital transport (3%), en route to hospital (7%), or in hospital (28%).  
40  
41  
42  
43

44  
45 Our study is the first nationally representative survey of the causes of death in India. The simple  
46  
47 descriptive statistics provide clear evidence on the large and avertable burden from RTI,  
48  
49 particularly among productive age adults and pedestrians. To the best of our knowledge, only  
50  
51 one recent study in Vietnam has used similar methods to analyze RTI deaths and policy  
52  
53 implications on a national scale.[35]  
54  
55  
56  
57  
58  
59  
60

1  
2  
3 Our study faced certain limitations. First, we might have misclassified certain causes of death  
4 including suicide as RTI deaths. However, the extent of misclassification should be minimal  
5 since the RHIME verbal autopsy method was shown to be robust in discerning between types of  
6 injury deaths[36] and since the immediate two-physician agreement was high for RTI deaths  
7 (89.5%, table 1). Furthermore, suicides cause about 200 000 deaths in India annually but few  
8 are due to RTI.[19] Second, since the modes of transportation, place and timing of death, and  
9 injuries sustained were extracted from layperson open-ended narratives, the data accuracy may  
10 be in question. For example with the deceased mode of transportation, the extent of  
11 misclassification (by our study) or misreporting (by NCRB) that contributed to the differences  
12 between the two sources is uncertain. With reported injuries, our findings from these narratives  
13 most likely undercounted less visible injuries (chest, abdomen, and spine) compared to highly  
14 visible injuries such as bleeding and deformity for head and extremity injuries. Nevertheless, our  
15 findings are consistent with available Indian regional surveys and hospital series on the mode of  
16 transportation[11,12,30-32] place and timing of death,[1,37-39] and injuries sustained.[12,40,41]  
17  
18 Third, since the narrative was not designed specifically to capture RTI death characteristics,  
19 over 25% of deaths had missing data for mode of transportation, place of death, timing of death,  
20 or reported injuries (supplementary table 1). Thus, our findings for these elements extracted  
21 from the narratives may be less representative of the decedents who lived in rural or poor areas.  
22  
23 Finally, reliable forward projection of the number of RTI deaths beyond 2005 was not possible  
24 since the increase in the NCRB reported number of RTI deaths of 140% from 2005 to 2011  
25 appeared to outpace the rate of population growth.[42] As the proportion of vulnerable road user  
26 deaths remained stable during this period in the NCRB reports, we postulated that this increase  
27 represented an actual increase in RTI death totals rather than more accurate reporting.  
28  
29 Furthermore, given the rapid economic expansion and concurrent changes in motorization  
30 including the types of vehicle sharing the road and road infrastructure,[43,44] our results on  
31 deceased mode of transportation, place and timing of death, and injuries sustained may not  
32  
33  
34  
35  
36  
37  
38  
39  
40  
41  
42  
43  
44  
45  
46  
47  
48  
49  
50  
51  
52  
53  
54  
55  
56  
57  
58  
59  
60



1  
2  
3 reflect the current Indian scenario. An analysis of the trend from 2001-2014 is planned pending  
4 ongoing data collection in the MDS.  
5  
6  
7  
8

9  
10 In India, RTI is a significant cause of preventable death, particularly in males of productive  
11 working age and among pedestrians, bicyclists, and motorcyclist. We have shown that properly  
12 designed simple verbal autopsy narratives can document the much needed surveillance data on  
13 the numbers, rates, risks, and basic RTI mechanism such as modes of transportation, timing of  
14 death, place of death, and injuries sustained. Our findings suggested that investment in primary  
15 and secondary prevention could address a large proportion of avoidable RTI deaths.  
16  
17  
18  
19  
20  
21  
22  
23

## 24 **ACKNOWLEDGEMENTS**

25  
26 We thank the Office of the RGI for the ongoing productive collaboration on the MDS, C  
27 Ramasundarahettige for technical assistance, M Puri and S Levitt for data extraction. The  
28 opinions expressed in this article are those of the authors and do not necessarily represent  
29 those of the Government of India or the RGI.  
30  
31  
32  
33  
34  
35  
36  
37

## 38 **COMPETING INTERESTS**

39 We declare that we have no competing interests.  
40  
41  
42  
43

## 44 **FUNDING**

45  
46 This study is supported by grants from the John E Fogarty International Center of the National  
47 Institutes of Health (R01-TW05991-01 and TW07939-01) and University of Toronto (to PJ); the  
48 Canada Research Chair Programme (to PJ and ABN); and the Canadian Institutes of Health  
49 Research Doctoral Award (to MH). The funding sources had no role in the study design; data  
50 collection, analysis, interpretation; writing of the manuscript; or decision to submit for publication.  
51  
52  
53  
54  
55  
56  
57  
58  
59  
60



1  
2  
3 The senior author had full access to all the data in the study and had final responsibility for the  
4  
5 decision to submit this study for publication.  
6  
7

### 8 9 **AUTHOR'S CONTRIBUTION**

10 PJ and the MDS Collaborators (appendix) designed, planned, the executed the MDS in close  
11  
12 collaboration with the Office of the Registrar General of India (RGI). MH and PJ performed the  
13  
14 data analysis. All authors contributed to data interpretation, revisions of the manuscript, and  
15  
16 provided final approval. PJ is the guarantor for this report.  
17  
18  
19

### 20 21 22 **DATA SHARING STATEMENT**

23  
24 Data used in this study is the property of the Registrar General of India. Application for data  
25  
26 access can be made to the Office of the Registrar General of India.  
27  
28  
29  
30  
31  
32  
33  
34  
35  
36  
37  
38  
39  
40  
41  
42  
43  
44  
45  
46  
47  
48  
49  
50  
51  
52  
53  
54  
55  
56  
57  
58  
59  
60

## REFERENCES

- 1 Peden M, Scurfield R, Sleet D, Mohan D, Hyder A, Jarawan E, *et al*. World report on road traffic injury prevention: World Health Organization. 2004.
- 2 Chisholm D, Naci H, Hyder AA, Tran NT, Peden M. Cost effectiveness of strategies to combat road traffic injuries in sub-Saharan Africa and South East Asia: mathematical modelling study. *BMJ* 2012;**344**:e612.
- 3 The PLoS Medicine Editors. Preventing Road Deaths—Time for Data. *PLoS Med* 2010;**7**:e1000257.
- 4 Barffour M, Gupta S, Gururaj G, Hyder AA. Evidence-based road safety practice in India: assessment of the adequacy of publicly available data in meeting requirements for comprehensive road safety data systems. *Traffic Inj Prev* 2012;**13 Suppl 1**:17–23.
- 5 Kopits E, Cropper ML. *Traffic fatalities and economic growth*. World Bank Development Research Group Environment and Infrastructure 2003.
- 6 Sathiyasekaran BW. Population-based cohort study of injuries. *Injury* 1996;**27**:695–8.
- 7 Varghese M, Mohan D. Transportation injuries in rural Haryana, North India. *In: Proceedings of the international conference on traffic safety 2003*;:326–9.
- 8 WHO. Injury Prevention and Control: An epidemiological study of injuries in the area of Municipal Corporation of Delhi. *Regional Office for South-East Asia* 2003;:1–18.
- 9 Gururaj G, Suryanarayana SP. Burden and impact of injuries: Results of population-based survey. *Proceedings of the 7th world conference on injury prevention 2004*;:275–6.
- 10 Dandona R. Patterns of road traffic injuries in a vulnerable population in Hyderabad, India.

- 1  
2  
3  
4  
5  
6  
7  
8  
9  
10  
11  
12  
13  
14  
15  
16  
17  
18  
19  
20  
21  
22  
23  
24  
25  
26  
27  
28  
29  
30  
31  
32  
33  
34  
35  
36  
37  
38  
39  
40  
41  
42  
43  
44  
45  
46  
47  
48  
49  
50  
51  
52  
53  
54  
55  
56  
57  
58  
59  
60
- Injury Prevention* 2006;**12**:183–8.
- 11 Dandona R, Kumar GA, Ameer MA, Ahmed GM, Dandona L. Incidence and burden of road traffic injuries in urban India. *Inj Prev* 2008;**14**:354–9.
- 12 Gururaj G. Road traffic deaths, injuries and disabilities in India: current scenario. *Natl Med J India* 2008;**21**:14–20.
- 13 Garg N, Hyder A. Road traffic injuries in India: A review of the literature. *Scand J of Public Health* 2006;**34**:100–9.
- 14 World Health Organization. *The Global Burden of Disease: 2004 Update*. World Health Organization 2008.
- 15 Mathers CD, Bernard C, Moesgaard Iburg K, Inoue M, Ma Fat D, Shibuya K, *et al*. Global Burden of Disease in 2002: data sources, methods, and results. Global Programme on Evidence for Health Policy Discussion Paper No. 54. World Health Organization. 2003.<http://www.who.int/healthinfo/paper54.pdf> (accessed Jan2013).
- 16 Jha P, Gajalakshmi V, Gupta PC, Kumar R, Mony P, Dhingra N, *et al*. Prospective Study of One Million Deaths in India: Rationale, Design, and Validation Results. *PLoS Med* 2006;**3**:e18.
- 17 Million Death Study Collaborators, Bassani DG, Kumar R, Awasthi S, Morris SK, Paul VK, *et al*. Causes of neonatal and child mortality in India: a nationally representative mortality survey. *Lancet* 2010;**376**:1853–60.
- 18 Dikshit R, Gupta PC, Ramasundarahettige C, Gajalakshmi V, Aleksandrowicz L, Badwe R, *et al*. Cancer mortality in India: a nationally representative survey. *Lancet* 2012;**379**:1807–16.

- 1  
2  
3 19 Patel V, Ramasundarahettige C, Vijayakumar L, Thakur JS, Gajalakshmi V, Gururaj G, *et al.* Suicide mortality in India: a nationally representative survey. *Lancet* 2012;**379**:2343–51.  
4  
5  
6  
7  
8  
9 20 Sinha DN, Dikshit R, Kumar R, Gajalakshmi V, Dhingra N, Shet J, *et al.* Prospective Study  
10 of Million Deaths in India: Technical document no VII: Health care professional's manual for  
11 assigning causes of death based on RHIME household reports. RGI-CGHR, University of  
12 Toronto. <http://www.cghr.org/mds> (accessed Aug2012).  
13  
14  
15  
16  
17  
18 21 WHO. *International Statistical Classification of Diseases and Related Health Problems,*  
19 *ICD-10: Three Volume Set.* World Health Organization 2010.  
20  
21  
22  
23  
24 22 United Nations Population Division. World population prospects (2008 revision).  
25 2009.<http://www.un.org/esa/population/publications/wpp2008/>  
26  
27  
28  
29 23 Mari Bhat PN. Completeness of India's sample registration system: an assessment using  
30 the general growth balance method. *Popul Stud* 2002;**56**:119–34.  
31  
32  
33  
34 24 Sivanandan V. *An assessment of the completeness of death registration in India over the*  
35 *periods 1975-1978 and 1996-1999 under the generalized population model: an analysis*  
36 *based on SRS data.* Mumbai: International Institute for Population Sciences 2004.  
37  
38  
39  
40  
41  
42 25 Jha P, Kumar R, Khera A, Bhattacharya M, Arora P, Gajalakshmi V, *et al.* HIV mortality and  
43 infection in India: estimates from nationally representative mortality survey of 1.1 million  
44 homes. *BMJ* 2010;**340**:c621.  
45  
46  
47  
48  
49 26 Dhingra N, Jha P, Sharma VP, Cohen AA, Jotkar RM, Rodriguez PS, *et al.* Adult and child  
50 malaria mortality in India: a nationally representative mortality survey. *Lancet*  
51 2010;**376**:1768–74.  
52  
53  
54  
55  
56  
57 27 National Crime Records Bureau. *Accidental Deaths and Suicides in India, 2005.* Ministry of  
58  
59  
60

- 1  
2  
3 Home Affairs, Government of India 2005.  
4  
5  
6  
7 28 Dandona R, Kumar GA, Ameer MA, Reddy GB, Dandona L. Under-reporting of road traffic  
8 injuries to the police: results from two data sources in urban India. *Inj Prev* 2008;**14**:360–5.  
9  
10  
11  
12 29 Alcorn T. Uncertainty clouds China's road-traffic fatality data. *Lancet* 2011;**378**:305–6.  
13  
14  
15 30 Naci H, Chisholm D, Baker TD. Distribution of road traffic deaths by road user group: a  
16 global comparison. *Inj Prev* 2009;**15**:55–9.  
17  
18  
19  
20 31 Mohan D. *The road ahead: Traffic injuries and fatalities in India*. Transportation research  
21 and injury prevention programme, Indian Institute of Technology, Delhi 2004.  
22  
23  
24  
25 32 Mohan D. Traffic safety and health in Indian cities. *Journal of Transport and Infrastructure*  
26 2002;**9**:79–94.  
27  
28  
29  
30  
31 33 Norton R, Hyder A, Bishai D, Peden M. Unintentional Injuries. In: *Disease Control Priorities*  
32 *in Developing Countries*. Oxford University Press, USA 2006.  
33  
34  
35  
36 34 Grimm M, Treibich C. Determinants of road traffic crash fatalities across Indian states.  
37 *Health Econ* Published Online First: 30 August 2012. doi:10.1002/hec.2870  
38  
39  
40  
41  
42 35 Ngo AD, Rao C, Phuong Hoa N, Hoy DG, Thi Quynh Trang K, Hill PS. Road traffic related  
43 mortality in Vietnam: Evidence for policy from a national sample mortality surveillance  
44 system. *BMC Public Health* 2012;**12**:561.  
45  
46  
47  
48  
49 36 Hsiao M, Morris SK, Bassani DG, Montgomery AL, Thakur JS, Jha P. Factors Associated  
50 with Physician Agreement on Verbal Autopsy of over 11500 Injury Deaths in India. *PLoS*  
51 *ONE* 2012;**7**:e30336.  
52  
53  
54  
55  
56  
57 37 Dandona R, Mishra A. Deaths due to road traffic crashed in Hyderabad city in India: need  
58  
59  
60

1  
2  
3 for strengthening surveillance. *Natl Med J India* 2004;**17**:74–9.  
4  
5

6  
7 38 Sahdev P, Lacqua MJ, Singh B, Dogra TD. Road traffic fatalities in Delhi: causes, injury  
8 patterns, and incidence of preventable deaths. *Accident Analysis & Prevention*  
9 1994;**26**:377–84.  
10  
11

12  
13  
14 39 Bhattacharjee J, Bora D, Sharma RS, Verghese T. Unnatural deaths in Delhi during 1991.  
15  
16 *Med Sci Law* 1996;**36**:194–8.  
17  
18

19  
20 40 Gururaj G, Shastry KVR, Chandramouli AB, Subbakrishna DK, Kraus JF. *Traumatic brain*  
21 *injury*. Bangalore: : National Institute of Mental Health and Neuro Sciences. 2005.  
22  
23

24  
25 41 Colohan AR, Alves WM, Gross CR, Torner JC, Mehta VS, Tandon PN, *et al*. Head injury  
26 mortality in two centers with different emergency medical services and intensive care. *J*  
27 *Neurosurg Pediatrics* 1989;**71**:202–7.  
28  
29

30  
31  
32 42 National Crime Records Bureau. *Accidental Deaths and Suicides in India, 2011*. Ministry of  
33 Home Affairs, Government of India 2011.  
34  
35

36  
37  
38 43 Transport Research Wing, Ministry of Road Transport & Highways. Basic Road Statistics of  
39 India. Government of India. 2012;:1–109.  
40  
41

42  
43 44 Transport Research Wing, Ministry of Road Transport & Highways. Road Transport Year  
44 Book (2009-10 & 2010-11). Government of India. 2012;:1–154.  
45  
46  
47  
48  
49  
50  
51  
52  
53  
54  
55  
56  
57  
58  
59  
60

## FIGURE LEGENDS

### **Figure 1: Road traffic injury deaths, age-standardized death rate, and cumulative risk (age 0-69 years) across states and regions of India, by gender.**

Death rates are standardized to the 2005 United Nations estimated Indian population. Symbol size is proportional to sample size. Northeast states include Sikkim, Arunachal Pradesh, Nagaland, Manipur, Mizoram, Tripura, and Meghalaya. Total estimates include the 80 male and 19 female deaths from Pondicherry, Chandigarh, Uttarakhand, Dadra & Nagar Haveli, A&N Islands, Daman & Diu, Lakshadweep, and Goa. CHT=Chhatisgarh.

### **Figure 2: Deceased mode of transportation, place of death, and timing of death.**

(A) Deceased mode of transportation in present study compared to National Crime Records Bureau 2005 Report. Shaded line represents vulnerable road users (defined as road users without a rigid barrier protecting against traumatic forces, i.e. pedestrian, bicyclist, motorcyclist, and three wheelers). Percentages from present study are weighted by state and rural/urban residence. T=estimated/reported number of deaths in 2005 (in thousands). (B) Place of death and (C) timing of death based on verbal autopsy narratives. Shaded lines represent deaths that are reported as occurring at the scene of collision or occurring instantly (defined as within 5 minutes).

### **Figure 3: Reported injuries from 1124 verbal autopsy narratives (49% of all 2299 RTI deaths).**

Percentages refer to those in each row with given injury (columns). \*Values in bold denote two by two chi square tests with  $p < 0.05$  (excluding unknowns). Abdominal and spinal injuries were also reported but not shown due to small numbers (61 and 25 cases, respectively).

|                        | Narrative section |                   |       | Timing of Death |                   |       | Place of Death |                   |       | Deceased Mode of Transportation |                   |       | Injury Reported |                   |       |
|------------------------|-------------------|-------------------|-------|-----------------|-------------------|-------|----------------|-------------------|-------|---------------------------------|-------------------|-------|-----------------|-------------------|-------|
|                        | Missing n (%)     | Not missing n (%) | p     | Missing n (%)   | Not missing n (%) | p     | Missing n (%)  | Not missing n (%) | p     | Missing n (%)                   | Not missing n (%) | p     | Missing n (%)   | Not missing n (%) | p     |
| 1 all RTI (n=2299)     | 142 (6.2)         | 2157 (93.8)       |       | 703 (30.6)      | 1596 (69.4)       |       | 566 (24.6)     | 1733 (75.4)       |       | 194 (8.4)                       | 2105 (91.6)       |       | 1175 (51.1)     | 1124 (48.9)       |       |
| 2 age                  |                   |                   |       |                 |                   |       |                |                   |       |                                 |                   |       |                 |                   |       |
| 3 <20 years            | 12 (2.9)          | 402 (97.1)        | 0.002 | 106 (25.6)      | 308 (74.4)        | 0.015 | 90 (21.7)      | 324 (78.0)        | 0.133 | 37 (8.9)                        | 377 (91.1)        | 0.687 | 199 (48.1)      | 215 (51.9)        | 0.172 |
| 4 ≥20 years            | 130 (6.9)         | 1755 (93.1)       |       | 597 (31.7)      | 1288 (68.3)       |       | 476 (25.3)     | 1409 (75.0)       |       | 157 (8.3)                       | 1728 (91.7)       |       | 976 (51.8)      | 909 (48.2)        |       |
| 5 sex                  |                   |                   |       |                 |                   |       |                |                   |       |                                 |                   |       |                 |                   |       |
| 6 male                 | 118 (6.2)         | 1785 (93.8)       | 0.916 | 582 (30.6)      | 1321 (69.4)       | 0.991 | 461 (24.2)     | 1442 (75.8)       | 0.336 | 161 (8.5)                       | 1742 (91.5)       | 0.934 | 972 (51.1)      | 931 (48.9)        | 0.946 |
| 7 female               | 24 (6.1)          | 372 (93.9)        |       | 121 (30.6)      | 275 (69.4)        |       | 105 (26.5)     | 291 (73.5)        |       | 33 (8.3)                        | 363 (91.7)        |       | 203 (51.3)      | 193 (48.7)        |       |
| 8 location             |                   |                   |       |                 |                   |       |                |                   |       |                                 |                   |       |                 |                   |       |
| 9 rural                | 125 (7.2)         | 1623 (92.9)       | 0.001 | 559 (32.0)      | 1189 (68.0)       | 0.009 | 456 (26.1)     | 1292 (73.9)       | 0.004 | 143 (8.2)                       | 1605 (91.8)       | 0.429 | 896 (51.3)      | 852 (48.7)        | 0.799 |
| 10 urban               | 17 (3.1)          | 534 (96.9)        |       | 144 (26.1)      | 407 (73.9)        |       | 110 (20.0)     | 441 (80.0)        |       | 51 (9.3)                        | 500 (90.7)        |       | 279 (50.6)      | 272 (49.4)        |       |
| 11 neighbourhood asset |                   |                   |       |                 |                   |       |                |                   |       |                                 |                   |       |                 |                   |       |
| 12 low                 | 126 (7.5)         | 1548 (92.5)       | 0.001 | 552 (33.0)      | 1122 (67.0)       | 0.000 | 451 (26.9)     | 1223 (73.1)       | 0.001 | 136 (8.1)                       | 1538 (91.9)       | 0.468 | 883 (52.8)      | 791 (47.3)        | 0.057 |
| 13 high                | 16 (3.2)          | 487 (96.8)        |       | 121 (24.1)      | 382 (75.9)        |       | 97 (19.3)      | 406 (80.7)        |       | 46 (9.2)                        | 457 (90.9)        |       | 241 (47.9)      | 262 (52.1)        |       |
| 14 missing             | 0 (0.0)           | 122 (100.0)       |       | 30 (24.6)       | 92 (75.4)         |       | 18 (14.8)      | 104 (85.3)        |       | 12 (9.8)                        | 110 (90.2)        |       | 51 (41.8)       | 71 (58.2)         |       |
| 15 education           |                   |                   |       |                 |                   |       |                |                   |       |                                 |                   |       |                 |                   |       |
| 16 below primary       | 38 (4.0)          | 916 (96)          | 0.000 | 289 (30.3)      | 665 (69.7)        | 0.894 | 230 (24.1)     | 724 (75.9)        | 0.719 | 80 (8.4)                        | 874 (91.6)        | 0.757 | 468 (49.1)      | 486 (50.9)        | 0.094 |
| 17 primary and above   | 100 (7.7)         | 1196 (92.3)       |       | 396 (30.6)      | 900 (69.4)        |       | 321 (24.8)     | 975 (75.2)        |       | 104 (8.0)                       | 1192 (92.0)       |       | 682 (52.6)      | 614 (47.4)        |       |
| 18 missing             | 4 (8.2)           | 45 (91.8)         |       | 18 (36.7)       | 31 (63.3)         |       | 15 (30.6)      | 34 (69.4)         |       | 10 (20.4)                       | 39 (79.6)         |       | 25 (51.0)       | 24 (49.0)         |       |
| 19 occupation          |                   |                   |       |                 |                   |       |                |                   |       |                                 |                   |       |                 |                   |       |
| 20 non-worker          | 60 (8.1)          | 679 (91.9)        | 0.006 | 243 (32.9)      | 496 (67.1)        | 0.094 | 205 (27.7)     | 534 (72.3)        | 0.016 | 60 (8.1)                        | 679 (91.9)        | 0.701 | 381 (51.6)      | 358 (48.4)        | 0.757 |
| 21 worker              | 81 (5.2)          | 1478 (94.8)       |       | 459 (29.4)      | 1100 (70.6)       |       | 360 (23.1)     | 1199 (76.9)       |       | 134 (8.6)                       | 1425 (91.4)       |       | 793 (50.9)      | 766 (49.1)        |       |
| 22 missing             | 1 (100.0)         | 0 (0.0)           |       | 1 (100.0)       | 0 (0.0)           |       | 1 (100.0)      | 0 (0.0)           |       | 0 (0.0)                         | 1 (100.0)         |       | 1 (100.0)       | 0 (0.0)           |       |

**Supplementary Table 1: Summary of missing data.** There are no missing values for age, sex, and location in the study population. The chi square test was used to determine the p values and excluded deaths with missing neighbourhood asset, education, or occupation.



|                                  | Timing of Death was Instant |             |         | Place of Death was Prehospital |             |         | Head Injury was Reported |             |                 |
|----------------------------------|-----------------------------|-------------|---------|--------------------------------|-------------|---------|--------------------------|-------------|-----------------|
|                                  | n (%)                       | Adjusted OR | 99% CI  | n (%)                          | Adjusted OR | 99% CI  | n (%)                    | Adjusted OR | 99% CI          |
| 1 non-vulnerable road users      | 170 (58.6)                  | ref         | --      | 223 (69.5)                     | ref         | --      | 125 (31.5)               | ref         | --              |
| 2 vulnerable road users:         |                             |             |         |                                |             |         |                          |             |                 |
| 3 pedestrian                     | 338 (58.5)                  | 1.1         | 0.7-1.7 | 425 (69.1)                     | 1.1         | 0.7-1.7 | 192 (24.9)               | 0.8         | 0.5-1.1         |
| 4 bicyclist & motorcyclist       | 245 (52.0)                  | 0.8         | 0.5-1.1 | 306 (59.2)                     | 0.6         | 0.4-1.0 | 256 (43.5)               | <b>1.7*</b> | <b>1.2-2.5*</b> |
| 5 three wheelers & animal riders | 93 (56.4)                   | 0.9         | 0.5-1.6 | 117 (67.6)                     | 0.9         | 0.5-1.7 | 72 (33.0)                | 1.2         | 0.7-1.9         |
| 6 unknown                        | 37 (40.2)                   | 0.5         | 0.3-1.0 | 55 (51.4)                      | 0.5         | 0.3-1.0 | 46 (25.1)                | 0.8         | 0.5-1.4         |

8 **Supplementary Table 2: Association between deceased mode of transportation and the timing of death, place of death, and head injuries reported.** Odds ratios  
9 are adjusted for deceased's age, sex, rural/urban, neighbourhood asset, and education. \*Value in bold denote statistically significant difference between comparison  
10 groups.  
11

|    | 2005 UN population estimates (in '000) | Number of RTI deaths in 2005* |        | Crude RTI Death Rate in 2005 (per 100,000)* |      | % Under-reporting of Crude RTI Death Rate |      |
|----|----------------------------------------|-------------------------------|--------|---------------------------------------------|------|-------------------------------------------|------|
|    |                                        | MDS                           | NCRB   | MDS                                         | NCRB |                                           |      |
| 1  |                                        |                               |        |                                             |      |                                           |      |
| 2  | Northeast States                       | 13211                         | 3610   | 724                                         | 27.3 | 5.5                                       | 79.9 |
| 3  | Punjab                                 | 26455                         | 7380   | 1622                                        | 27.9 | 6.1                                       | 78.0 |
| 4  | Bihar + Jharkhand                      | 122181                        | 13172  | 3430                                        | 10.8 | 2.8                                       | 74.0 |
| 5  | Uttar Pradesh                          | 186591                        | 33287  | 9860                                        | 17.8 | 5.3                                       | 70.4 |
| 6  | Jammu & Kashmir                        | 11120                         | 2335   | 857                                         | 21.0 | 7.7                                       | 63.3 |
| 7  | Other States                           | 14121                         | 4037   | 1589                                        | 28.6 | 11.3                                      | 60.6 |
| 8  | Assam                                  | 29150                         | 3277   | 1456                                        | 11.2 | 5.0                                       | 55.6 |
| 9  | West Bengal                            | 86499                         | 9363   | 4364                                        | 10.8 | 5.0                                       | 53.4 |
| 10 | Madhya Pradesh + CDH                   | 90568                         | 15726  | 7686                                        | 17.4 | 8.5                                       | 51.1 |
| 11 | Haryana                                | 23688                         | 6128   | 3282                                        | 25.9 | 13.9                                      | 46.4 |
| 12 | Orissa                                 | 39485                         | 5083   | 2895                                        | 12.9 | 7.3                                       | 43.0 |
| 13 | Kerala                                 | 33785                         | 5051   | 3161                                        | 15.0 | 9.4                                       | 37.4 |
| 14 | Maharashtra                            | 106386                        | 16638  | 10613                                       | 15.6 | 10.0                                      | 36.2 |
| 15 | Rajasthan                              | 63375                         | 9237   | 6793                                        | 14.6 | 10.7                                      | 26.5 |
| 16 | Gujarat                                | 55926                         | 6987   | 5264                                        | 12.5 | 9.4                                       | 24.7 |
| 17 | Himachal Pradesh                       | 6559                          | 1077   | 854                                         | 16.4 | 13.0                                      | 20.7 |
| 18 | Karnataka                              | 57141                         | 8172   | 6876                                        | 14.3 | 12.0                                      | 15.9 |
| 19 | Delhi                                  | 16289                         | 2161   | 2023                                        | 13.3 | 12.4                                      | 6.4  |
| 20 | Tamil Nadu                             | 66154                         | 14808  | 13961                                       | 22.4 | 21.1                                      | 5.7  |
| 21 | Andhra Pradesh                         | 81934                         | 10991  | 10944                                       | 13.4 | 13.4                                      | 0.4  |
| 22 | Total                                  | 1130618                       | 178520 | 98254                                       | 15.8 | 8.7                                       | 45.0 |

**Supplementary Table 3: Comparison between present study (MDS) estimates and National Crime Records Bureau (NCRB) police reports of the number of RTI deaths and crude death rate, by state.** \*Excludes railroad deaths since NCRB does not publish state-level railroad death figures. Northeast States include Sikkim, Arunachal Pradesh, Nagaland, Manipur, Mizoram, Tripura, and Meghalaya. Other States include Pondicherry, Chandigarh, Uttaranchal, Dadra & Nagar Haveli, A & N Islands, Daman & Diu, Lakshadweep, and Goa. CDH = Chhatisgarh. % under reporting = (MDS death rate - NCRB death rate) / MDS death rate \*100%.

1  
2  
3  
4  
5  
6  
7  
8  
9  
10  
11  
12  
13  
14  
15  
16  
17  
18  
19  
20  
21  
22  
23  
24  
25  
26  
27  
28  
29  
30  
31  
32  
33  
34  
35  
36  
37  
38  
39  
40  
41  
42  
43  
44  
45  
46  
47  
48  
49  
50  
51  
52  
53  
54  
55  
56  
57  
58  
59  
60

## MILLION DEATH STUDY COLLOBORATORS

### Indian Academic Partners (in alphabetical order):

61. Department of Community Medicine Gujarat Medical College, Ahmedabad: DV Bala, P Seth, KN Trivedi
72. Department of Community Medicine Kolkatta Medical College, Kolkatta: SK Roy
83. Department of Community Medicine Regional Institute of Medical Sciences, Imphal: L Usharani
94. Department of Community Medicine S.C.B. Medical College Cuttack, Orissa: Dr. B Mohapatra
10. Department of Community Medicine SMS Medical College Jaipur: AK Bharadwaj, R Gupta
11. Epidemiological Research Center, Chennai: V Gajalakshmi, CV Kanimozhi
12. Gandhi Medical College, Bhopal: RP Dikshit, S Sorangi
13. Healix-Seskarhia Institute of Public Health, Navi Mumbai: PC Gupta, MS Pednekar, S Sreevidya
14. Apollo Institute of Medical Sciences & Research, Hyderabad: P Bhatia
15. St. John's Academy of Health Sciences, Bangalore: A Kurpad, P Mony, M Vaz, S Srinivasan, A Shet, AS Shet, D Xavier, S Rathi, V Habbare
18. King George Medical College, Lucknow: S Awasthi
19. Najafgarh Rural Health Training Centre, Ministry of Health Government of India, New Delhi: N Dhingra, J Sudhir, I Rawat (until 2007)
213. Regional Medical Research Center, ICMR Institute, Bhubaneshwar: AS Karketta, SK Dar
24. School of Preventative Oncology, Patna: DN Sinha
25. School of Public Health Post Graduate Institute of Medical Education and Research, Chandigarh: N Kaur, R Kumar, JS Thakur
26. Tata Memorial Cancer Hospital, Mumbai: RA Badwe, RP Dikshit, M Mallath, K Panse, A Budukh

### Lead Partners:

29. Office of the Registrar-General India, RK Puram, New Delhi India: C Chandramouli (Registrar General of India [RGI]), C Sethi, B Mishra (until 2012), S Jain (until 2008), DK Dey, AK Saxena, MS Thapa, N Kumar; JK Banthia and DK Sikri (former RGIs)
33. Million Death Study Coordinating Centre for Global Health Research (CGHR) Li Ka Shing Knowledge Institute, St. Michael's Hospital, Dalla Lana School of Public Health, University of Toronto, Canada: P Jha (Principal Investigator), R Kamadod, S Rathi, S Rao-Seshadri, P Rodriguez, P Sati, J Sudhir, C Ramasundarahettige, W Suraweera

### Affiliated Partners:

38. Indian Council of Medical Research, New Delhi India: VM Katoch (Director General or DG from 2008), NK Ganguly (DG to 2008), L Kant, B Bhattacharya, B Shah, DK Shukla
41. World Health Organisation, Geneva and SEARO Office, New Delhi: T Boerma, A Fric, S Habayeb (former WHO Representative-India), S Khanum, CD Mathers, DN Sinha, N Singh, P Singh (Deputy Regional Director)
43. Clinical Trial Service Unit and Epidemiological Studies Unit (CTSU), University of Oxford, England: N Bhala, J Boreham, R Peto, G Whitlock



**Road traffic injury mortality and its mechanisms in India:  
nationally representative mortality survey of 1.1 million  
homes**

|                                                                                                                                                         |                                                                                                                                                                                                                                                                                                                                                                                                                                                                                                                                                                                                                                                              |
|---------------------------------------------------------------------------------------------------------------------------------------------------------|--------------------------------------------------------------------------------------------------------------------------------------------------------------------------------------------------------------------------------------------------------------------------------------------------------------------------------------------------------------------------------------------------------------------------------------------------------------------------------------------------------------------------------------------------------------------------------------------------------------------------------------------------------------|
| Journal:                                                                                                                                                | <i>BMJ Open</i>                                                                                                                                                                                                                                                                                                                                                                                                                                                                                                                                                                                                                                              |
| Manuscript ID:                                                                                                                                          | bmjopen-2013-002621.R1                                                                                                                                                                                                                                                                                                                                                                                                                                                                                                                                                                                                                                       |
| Article Type:                                                                                                                                           | Research                                                                                                                                                                                                                                                                                                                                                                                                                                                                                                                                                                                                                                                     |
| Date Submitted by the Author:                                                                                                                           | 15-May-2013                                                                                                                                                                                                                                                                                                                                                                                                                                                                                                                                                                                                                                                  |
| Complete List of Authors:                                                                                                                               | Hsiao, Marvin; University of Toronto, Centre for Global Health Research; University of Toronto, Department of Surgery<br>Malhotra, Ajai; VCU Medical Center, Virginia Commonwealth University, Department of Surgery<br>Thakur, JS; Post Graduate Institute of Medical Education and Research, Department of Community Medicine<br>Sheth, Jay; Smt. N.H.L. Municipal Medical College,<br>Nathens, Avery; University of Toronto, Department of Surgery;<br>Sunnybrook Health Sciences Centre, Sunnybrook Research Institute<br>Dhingra, Neeraj; National AIDS Control Organization,<br>Jha, Prabhat; University of Toronto, Centre for Global Health Research |
| <b>Primary Subject Heading</b>:                                                                                                                         | Epidemiology                                                                                                                                                                                                                                                                                                                                                                                                                                                                                                                                                                                                                                                 |
| Secondary Subject Heading:                                                                                                                              | Global health, Public health                                                                                                                                                                                                                                                                                                                                                                                                                                                                                                                                                                                                                                 |
| Keywords:                                                                                                                                               | road traffic injury, verbal autopsy, India, low- and middle-income countries                                                                                                                                                                                                                                                                                                                                                                                                                                                                                                                                                                                 |
| Note: The following files were submitted by the author for peer review, but cannot be converted to PDF. You must view these files (e.g. movies) online. |                                                                                                                                                                                                                                                                                                                                                                                                                                                                                                                                                                                                                                                              |
| STROBE_checklist_BMJ-Open_cross-sectional-studies.doc                                                                                                   |                                                                                                                                                                                                                                                                                                                                                                                                                                                                                                                                                                                                                                                              |

SCHOLARONE™  
Manuscripts

## Road traffic injury mortality and its mechanisms in India: nationally representative mortality survey of 1.1 million homes

Marvin Hsiao, Ajai Malhotra, JS Thakur, Jay K Sheth, Avery B Nathens, Neeraj Dhingra, Prabhat Jha, for the Million Death Study Collaborators.

Centre for Global Health Research, Li Ka Shing Knowledge Institute, St Michael's Hospital, University of Toronto, Toronto, Canada (M Hsiao MD, Prof P Jha DPhil); Division of General Surgery, Department of Surgery, University of Toronto, Toronto, Canada (M Hsiao MD, Prof AB Nathens MD); Department of Surgery, VCU Medical Center, Virginia Commonwealth University, Richmond, USA (Prof A Malhotra MD); Department of Community Medicine, Post Graduate Institute of Medical Education and Research, Chandigarh, India (JS Thakur MD); Smt. N.H.L. Municipal Medical College, Ahmedabad, India (JK Sheth MD); Sunnybrook Research Institute, Sunnybrook Health Sciences Centre, Toronto, Canada (Prof AB Nathens MD); National AIDS Control Organization, New Delhi, India (N Dhingra MD)

Correspondence to:

Marvin Hsiao

Centre for Global Health Research, Li Ka Shing Knowledge Institute, St Michael's Hospital, and Division of General Surgery, Department of Surgery, University of Toronto  
30 Bond Street, Toronto, Ontario, Canada M5B 1W8

[marvin.my.hsiao@gmail.com](mailto:marvin.my.hsiao@gmail.com)

+1 416-864-6042 (phone) / +1 416-864-5256 (fax)

Keywords: Road traffic injury; verbal autopsy; India; low- and middle-income countries

Word count: Text:3440

**ABSTRACT:**

**Objectives:** To quantify and describe the mechanism of road traffic injury (RTI) deaths in India.

**Design:** We conducted a nationally representative mortality survey where at least two physicians coded each non-medical field staff's verbal autopsy reports. RTI mechanism data were extracted from the narrative section of these reports.

**Setting:** 1.1 million homes in India.

**Participants:** Over 122 000 deaths at all ages from 2001-2003.

**Primary and secondary outcome measures:** Age- and sex-specific mortality rates, place and timing of death, modes of transportation, and injuries sustained.

**Results:** The 2299 RTI deaths in the survey correspond to an estimated 183 600 RTI deaths or about 2% of all deaths in 2005 nationally, of which 65% occurred in males between the ages of 15-59 years. The age-adjusted mortality rate was greater in males than in females, in urban than in rural areas, and was notably higher than that estimated from national police records. Pedestrians (68 000), motorcyclists (36 000), and other vulnerable road users (20 000) constituted 68% of RTI deaths (124 000) nationally. Among the study sample, the majority of all RTI deaths occurred at the scene of collision (1005/1733, 58%), within minutes of collision (883/1596, 55%), and/or involved a head injury (691/1124, 62%). Compared to non-pedestrian RTI deaths, about 55 000 (81%) of pedestrian deaths were associated with less education and living in poorer neighbourhoods.

**Conclusions:** In India, RTI cause a substantial number of deaths, particularly among pedestrians and other vulnerable road users. Interventions to prevent collisions and reduce injuries might address over half of the RTI deaths. Improved pre-hospital transport and hospital trauma care might address just over a third of the RTI deaths.

## ARTICLE SUMMARY

### Article focus

- To directly estimate the age- and sex-specific mortality rates and describe the place and timing of death, modes of transportation, and injuries sustained for road traffic injury (RTI) deaths in India using a nationally representative mortality survey of 1.1 million homes.

### Key messages

- Road traffic injuries cause a substantial number of avertable deaths, particularly in males of productive working age and among pedestrians and other vulnerable road users.
- Preventative interventions should be emphasized as the majority of all RTI deaths occurred at the scene of collision, within minutes of collision, and/or involved a head injury.
- Properly designed mortality survey with verbal autopsy narratives can provide much-needed data to assist RTI prevention efforts.

### Strengths and limitations of this study

- This study is the first nationally representative survey of the causes of death in India and overcomes limitations of existing data sources including regional injury surveys, hospital series, and national police reports.
- Limitations of the study include potential misclassification of deaths by physician coders, the use of layperson narratives with a potential for recall bias and inaccuracies, and limited ability to forward project study results given the rapid changes in motorization in India.

## INTRODUCTION

Road traffic injuries (RTI) area large and growing public health burden, especially in low-and middle-income countries (LMIC) where 90% of the world's deaths due to RTI are estimated to occur.[1] There are few high-quality epidemiologic data on RTI to guide the development, implementation, and surveillance of evidence-based policy and programs in LMICs.[2-4]

The number of deaths due to RTI in India is projected to rise with increasing motorization.[1,5]Aside from a few regional injury surveys,[6-11] the current data on the numbers and mechanisms of RTI deaths in India rely on police or hospital records, both of which can substantially underestimate death rates in the poor, rural, and uneducated people who still constitute large proportions of the Indian population.[2-4,12,13]

The World Health Organization (WHO), using indirect modeling methods, estimated about 202 000 RTI deaths in India in 2004.[14,15] No study has validated this estimate with direct measurement nor documented detailed RTI mechanism for India nationally. Here, we estimate the regional, age- and sex-specific mortality rate and risk of RTI death in India using data from the Million Death Study (MDS). We also report the modes of transportation, place and timing of death, and injuries sustained in RTI deaths.



## METHODS

**Study Design:** The MDS is an on-going nationally representative survey designed to determine the causes and risk factors of death in India, organized by the Registrar General of India (RGI). The design, methodology, and preliminary findings of the MDS have been described elsewhere.[16-19]In brief, the MDS used an enhanced version of verbal autopsy (known as the routine, reliable, representative, re-sampled household investigation of mortality with medical evaluation or RHIME) to monitor a nationally representative sample of 1.1 million households in the Sample Registration System (SRS). Within six months of every death occurring in these households from 2001-3, a trained, nonmedical RGI surveyor interviewed a relative or close-acquaintance of the deceased to obtain the symptoms and events around the death using structured questions and a local language narrative guided by a specific symptom list. These records were converted into electronic records and emailed to two of 140 trained physicians who, independently and anonymously, assigned an underlying cause of death (with allocation determined randomly based only on the physician's ability to read the local language), using guidelines for the major causes of death.[20]Records were assigned cause of death in three-digit International Statistical Classification of Diseases and Related Health Problems, 10th revision (ICD-10).[21] Records where coders disagreed on the cause of death underwent anonymous reconciliation. Continuing disagreements were adjudicated by a third senior physician. Five percent of households were randomly resurveyed and the results were consistent within families of ICD-10 codes.[16] Participation in the SRS is on a voluntary basis and oral consent was obtained under the confidentiality and consent procedures of the Registration of Births and Deaths Act, 1969.

**Road Traffic Injury Deaths:** The RTI deaths in this study were of people who died between 2001 and 2003 with a final assigned ICD-10 code within V01-V89. We translated the open-ended narratives into English from 14 local languages, and systematically extracted the modes

1  
2  
3 of transportation, place and timing of death, and injuries sustained from 2157 of the 2299 RTI  
4 deaths using a standardized data extraction tool and procedure (the remaining 142 deaths, 6%,  
5 had missing or illegible narratives). For these four data elements, there were substantial inter-  
6 rater agreement between two investigators and two research assistants who were trained and  
7 independently extracted data from the narratives of a random 10% of RTI deaths (lowest kappa  
8 statistic was greater than 0.69 for all pair-wise comparisons between the four data extractors;  
9 data not shown). The two research assistants then independently extracted data from all  
10 narratives. Adjudication was done by an investigator (MH) for discrepancies in extracted data.  
11  
12  
13  
14  
15  
16  
17  
18  
19  
20  
21  
22

**Analysis:** The age and sex-specific proportion of RTI deaths within the 2001-2003 survey was  
23 applied to the 2005 United Nations (UN) estimates of the number of deaths from all causes in  
24 India, after weighting for sampling probability.[22] The 2005 UN death estimates were used so  
25 as to correct for the slight undercounts reported in the total death rates in the SRS[23,24] and to  
26 account for the 12% of enumerated deaths without completed field visits (mostly due to out-  
27 migration of the family or from incomplete field records). The proportion of these missed deaths  
28 was similarly dispersed across sex, age, and states. Use of 2003 or 2004 UN death totals  
29 yielded nearly identical results (data not shown). The 99% confidence intervals (99%CI) for  
30 mortality rate were calculated based on the weighted number of study deaths. State- and  
31 rural/urban-specific estimates of the number, mortality rate, and lifetime risk of RTI death were  
32 calculated by partitioning the UN national death totals according to relative SRS death rates as  
33 previously described.[18,25,26] Urban and rural status was defined according to the Census of  
34 India. Logistic regression was used to compare the socio-demographic traits of pedestrian and  
35 non-pedestrian RTI deaths. Household fuel type was used as a measure of community wealth,  
36 based on earlier principal component analyses [18]: high asset neighbourhoods had >50% of  
37 households that used gas, electricity, or kerosene; low asset or poor neighbourhoods used  
38  
39  
40  
41  
42  
43  
44  
45  
46  
47  
48  
49  
50  
51  
52  
53  
54  
55  
56  
57  
58  
59  
60

1  
2  
3 primarily coal, firewood, or other. Attributable proportion was calculated for traits of pedestrian  
4  
5 deaths compared to non-pedestrian RTI deaths.  
6  
7

8  
9  
10 The MDS received ethics approval from the review boards of the Post-Graduate Institute of  
11  
12 Medical Education and Research in Chandigarh, India; St Michael's Hospital in Toronto,  
13  
14 Canada; and the Indian Council of Medical Research's Health Ministry's Screening Committee.  
15  
16  
17  
18  
19

## 20 21 **RESULTS**

22  
23 The 2299 RTI deaths in the 2001-2003 survey correspond to an estimated 183 600 (99%CI 173  
24  
25 800-193 400) RTI deaths in India in 2005. The majority of these RTI deaths occurred in males  
26  
27 (152 100 deaths, 82.8%; table 1). The age-standardized RTI mortality rate for males (26.2 per  
28  
29 100 000, 24.6-27.7) was higher than for females (5.7 per 100 000, 5.0-6.4). While the RTI  
30  
31 mortality rate increased with age in both genders, the largest number of RTI deaths occurred in  
32  
33 males between 15-59 years of age (118 900, 64.8%).  
34  
35  
36  
37

38 At these death rates and in the theoretical absence of other causes of death, males in India had  
39  
40 a 2.1% (2.0-2.3) risk of dying from RTI before age 70, with the highest risks at ages 30-59  
41  
42 years; females had a 0.5% (0.4-0.5) risk of dying from RTI before age 70. Males in Haryana,  
43  
44 Punjab, Tamil Nadu, and Uttar Pradesh had significantly higher risks (3.0-4.1%) than the  
45  
46 national risk (figure 1). In contrast, males in Bihar, Jharkhand, Andhra Pradesh, Orissa, Gujarat,  
47  
48 and West Bengal had significantly lower risks (1.3-1.6%) than the national risk of RTI deaths.  
49  
50 Males living in urban areas had slightly higher age-standardized mortality rates and risks of RTI  
51  
52 deaths (27.6 per 100 000; 2.4%, 2.1-2.6) compared to males living in rural areas (24.9 per 100  
53  
54 000; 2.0%, 1.8-2.1). By contrast, female RTI mortality rates and risks before age 70 varied much  
55  
56 less across states and were similar in rural and urban areas (data not shown).  
57  
58  
59  
60

1  
2  
3  
4  
5  
6  
7  
8  
9  
10  
11  
12  
13  
14  
15  
16  
17  
18  
19  
20  
21  
22  
23  
24  
25  
26  
27  
28  
29  
30  
31  
32  
33  
34  
35  
36  
37  
38  
39  
40  
41  
42  
43  
44  
45  
46  
47  
48  
49  
50  
51  
52  
53  
54  
55  
56  
57  
58  
59  
60

For peer review only

|                                               | Study deaths, 2001-2003                 |                 |             | BMJ Open                     | All India, 2005                                       |                                  |                                      |                            |
|-----------------------------------------------|-----------------------------------------|-----------------|-------------|------------------------------|-------------------------------------------------------|----------------------------------|--------------------------------------|----------------------------|
|                                               | Number of RTI deaths / all coded deaths | Proportion RTI* | Rural (%**) | Two coders immediately agree | All deaths / population (millions, 2005 UN estimates) | Estimated RTI deaths§, thousands | RTI death rateΨ per 100 000 (99% CI) | Period risk for RTI death† |
| <b>1 Male - age in years</b>                  |                                         |                 |             |                              |                                                       |                                  |                                      |                            |
| 2 0-4                                         | 44 / 11719                              | 0.4%            | 37 (76.7)   | 44                           | 1.2 / 67                                              | 4.9                              | 7.4 (6.5-8.4)¶                       | 0.04%                      |
| 3 5-14                                        | 97 / 1926                               | 5.2%            | 86 (84.1)   | 87                           | 0.2 / 129                                             | 8.5                              | 6.6 (4.9-8.3)                        | 0.1%                       |
| 4 15-29                                       | 605 / 4727                              | 13.0%           | 462 (68.9)  | 558                          | 0.4 / 163                                             | 47.1                             | 28.9 (25.9-31.9)                     | 0.4%                       |
| 5 30-44                                       | 529 / 6817                              | 7.7%            | 385 (67.0)  | 477                          | 0.6 / 115                                             | 43.8                             | 37.9 (33.7-42.1)                     | 0.6%                       |
| 6 45-59                                       | 356 / 11731                             | 3.0%            | 249 (60.9)  | 312                          | 0.9 / 73                                              | 28.0                             | 38.4 (33.2-43.6)                     | 0.6%                       |
| 7 60-69                                       | 149 / 12120                             | 1.2%            | 117 (71.8)  | 133                          | 0.9 / 24                                              | 10.6                             | 44.0 (34.6-53.4)                     | 0.5%                       |
| 8 >70                                         | 123 / 18732                             | 0.6%            | 106 (81.2)  | 98                           | 1.3 / 14                                              | 9.1                              | 64.5 (49.1-80.0)                     | --                         |
| 9 All ages                                    | 1903 / 67772                            | 2.8%            | 1442 (68.9) | 1709                         | 5.3 / 585                                             | 152.1                            | 26.2                                 | 2.1%†                      |
| 10 (% or 99% CI)                              |                                         |                 |             | (89.8%)                      |                                                       | (143.2-161.0)                    | (24.6-27.7)                          | (2.0-2.3)                  |
| <b>11 Female - age in years</b>               |                                         |                 |             |                              |                                                       |                                  |                                      |                            |
| 12 0-4                                        | 50 / 11492                              | 0.4%            | 46 (93.4)   | 45                           | 1.2 / 61                                              | 5.0                              | 8.1 (7.1-9.1)¶                       | 0.04%                      |
| 13 5-14                                       | 44 / 1955                               | 2.3%            | 38 (80.1)   | 43                           | 0.2 / 118                                             | 3.8                              | 3.2 (2.0-4.4)                        | 0.03%                      |
| 14 15-29                                      | 72 / 4394                               | 1.5%            | 53 (60.5)   | 63                           | 0.3 / 150                                             | 5.3                              | 3.5 (2.4-4.6)                        | 0.1%                       |
| 15 30-44                                      | 59 / 4055                               | 1.4%            | 39 (59.0)   | 50                           | 0.3 / 106                                             | 4.4                              | 4.1 (2.7-5.5)                        | 0.1%                       |
| 16 45-59                                      | 70 / 6402                               | 1.1%            | 55 (70.9)   | 61                           | 0.5 / 69                                              | 6.0                              | 8.6 (5.9-11.3)                       | 0.1%                       |
| 17 60-69                                      | 54 / 9016                               | 0.6%            | 42 (68.6)   | 52                           | 0.6 / 25                                              | 3.7                              | 14.8 (9.8-19.9)                      | 0.2%                       |
| 18 >70                                        | 47 / 17343                              | 0.3%            | 33 (61.8)   | 35                           | 1.3 / 16                                              | 3.5                              | 21.6 (13.4-29.9)                     | --                         |
| 19 All ages                                   | 396 / 54657                             | 0.7%            | 306 (69.8)  | 349                          | 4.5 / 546                                             | 31.5                             | 5.7                                  | 0.5%†                      |
| 20 (% or 99% CI)                              |                                         |                 |             | (88.1%)                      |                                                       | (27.5-35.6)                      | (5.0-6.4)                            | (0.4-0.5)                  |
| <b>21 Total male and female, &lt;70 years</b> | 2129 / 86354                            | 2.4%            | 1609 (68.5) | 1925                         | 7.2 / 1100                                            | 171.0                            | 15.5                                 | 1.3%†                      |
| 22 (% or 99% CI)                              |                                         |                 |             | (90.4%)                      |                                                       | (161.5-180.4)                    | (14.7-16.4)                          | (1.3-1.4)                  |
| <b>23 Total male and female, all ages</b>     | 2299 / 122429                           | 1.8%            | 1748 (69.0) | 2058                         | 9.8 / 1131                                            | 183.6                            | 16.2                                 | 1.3%†                      |
| 24 (% or 99% CI)                              |                                         |                 |             | (89.5%)                      |                                                       | (173.8-193.4)                    | (15.4-17.1)                          | (1.3-1.4)                  |

**Table 1: Road traffic injury deaths in the present study and estimated national totals for 2005, by age and gender.** \*Proportion of RTI deaths compared to all deaths, weighted by state and residence (rural/urban). \*\*Percentage rural is weighted by state and residence (rural/urban). §Obtained by multiplying the United Nations estimated total deaths in 2005 by the weighted proportions. ΨAge standardized to the 2005 United Nations estimated Indian population; 99% CI shown are calculated based on weighted number of study deaths, which result in wider CI than those based on physician agreement. †Annual RTI death rate multiplied by the duration of age range, except for the lifetime risk which is calculated between 0-69 years by summation of the age specific period risks. ¶Crude death rate.

1  
2  
3 The deceased mode of transportation was described in the narratives of 2105 (92%) of the RTI  
4 deaths. National estimates for the deceased mode of transportation were calculated, as those  
5 with unknown and known modes of transportation did not appear to differ with respect to the  
6 major socio-demographic traits (Supplementary Table 1). Vulnerable road users are those  
7 without a rigid barrier protecting against traumatic forces and include pedestrians, motorcyclists,  
8 bicyclists, and three-wheelers. They constituted a majority (68%; n=124 000, 99%CI 115 000-  
9 131 000) of RTI deaths, led by pedestrians (37%; n=68 000, 62 000-73 000) and motorcyclists  
10 (20%; n=36 000, 31 000-40 000) (figure 2). Drivers and passengers of motorized four-wheelers  
11 comprised 16% (n=31 000, 27 000-35 000) of RTI deaths. By contrast, the 2005 police reports,  
12 which use a different but compatible classification system to ICD-10, recorded only 33000  
13 vulnerable road user deaths and only 9000 pedestrian deaths.[27] The most common types of  
14 vehicle to collide into the decedents were heavy transport vehicles and buses (37%; n=68 000,  
15 61 000-74 000), followed by cars and vans (15%; n=28 000, 24 000-32 000). Single-vehicle  
16 incidents comprised 9% of deaths (n=17 000, 14 000-20 000). The most frequent combinations,  
17 resulting in 23% (n=42 000, 37 000-47 000) of RTI deaths, were collisions of heavy transport  
18 vehicles or buses with pedestrians and motorcyclists (data not shown).  
19  
20  
21  
22  
23  
24  
25  
26  
27  
28  
29  
30  
31  
32  
33  
34  
35  
36  
37  
38  
39

40 The place and timing of death were described in the narratives of 1733 (75%) and 1596 (69%)  
41 of the RTI deaths respectively (figure 2; see supplementary table 1 for a summary of missing  
42 data from the narratives with respect to deceased characteristics). For these narratives, only the  
43 study proportion and not national estimates were made. Most RTI deaths occurred at the scene  
44 of collision (58%, 1005/1733) or instantly, defined as within 5 minutes (55%, 883/1596). Only 3%  
45 (45/1733) were labeled as potentially avertable with better pre-hospital transport as they  
46 occurred on scene but not instantly. Another 35% of deaths occurred en route (7%, 124/1733) or  
47 in hospital (28%, 481/1733).  
48  
49  
50  
51  
52  
53  
54  
55  
56  
57  
58  
59  
60

1  
2  
3 Injuries sustained by the deceased were reported from 1124 narratives (49%). Head injuries  
4  
5 were the most commonly reported (62%, 691/1124), of which 76% (524/691) were reported as  
6  
7 isolated head injuries (figure 3). A greater percentage of motorcyclists (78%, 188/241) had head  
8  
9 injuries reported compared to non-motorcyclists (57%, 457/807). After adjusting for age, sex,  
10  
11 rural/urban, neighbourhood asset, and education, bicyclists and motorcyclists were more likely  
12  
13 to have head injuries reported compared to non-vulnerable road users (adjusted OR 1.7, 1.2-  
14  
15 2.5) (supplementary table 2).  
16  
17  
18  
19

20  
21 Compared to non-pedestrian RTI deaths, pedestrian deaths occurred to those who had less  
22  
23 education (or in the case of children age <15 years, have less educated parents) (adjusted OR  
24  
25 2.9, 99%CI 2.0-4.2), lived in poorer neighbourhoods (1.7, 1.1-2.5), were children or elderly adults  
26  
27 (<15 years: 2.9, 1.8-4.5; >59 years: 1.7, 1.2-2.4), were female (1.5, 1.2-2.2), and lived in urban  
28  
29 areas (1.5, 1.1-2.2) (table 2). If pedestrian deaths had the same proportion of secondary or  
30  
31 higher education as non-pedestrian RTI deaths, there would be 406/825 (49%) fewer pedestrian  
32  
33 deaths, corresponding to approximately 33 000 deaths nationally in 2005. The corresponding  
34  
35 attributable proportion for living in richer versus poorer neighbourhoods would be 265/825 (32%)  
36  
37 or approximately 22 000 deaths nationally. Within the narratives we could code, there were no  
38  
39 differences between pedestrians and non-pedestrian RTI deaths in timing of death, place of  
40  
41 death, reported injuries, or reported routine use of alcohol or smoking (data not shown).  
42  
43  
44  
45  
46  
47  
48  
49  
50  
51  
52  
53  
54  
55  
56  
57  
58  
59  
60

|                                          | Pedestrian /<br>Non-Pedestrian<br>Total=825/1280 | Adjusted OR <sup>^</sup><br>(99% CI) | Attributable<br>Pedestrian Deaths<br>(% of all 825<br>pedestrian deaths) |
|------------------------------------------|--------------------------------------------------|--------------------------------------|--------------------------------------------------------------------------|
| <b>Education*</b>                        |                                                  |                                      |                                                                          |
| Secondary or higher                      | 112/382                                          | ref                                  |                                                                          |
| Primary or middle                        | 248/450                                          | 1.8 (1.3-2.6)                        | 110 } 406 (49%)                                                          |
| Below primary                            | 451/423                                          | 2.9 (2.0-4.2)                        |                                                                          |
| Unknown                                  | 14/25                                            | 1.6 (0.6-4.2)                        | N/A                                                                      |
| <b>Neighbourhood Asset</b>               |                                                  |                                      |                                                                          |
| High                                     | 137/320                                          | ref                                  |                                                                          |
| Low                                      | 643/895                                          | 1.7 (1.1-2.5)                        | 265 (32%)                                                                |
| Unknown                                  | 45/65                                            | 1.5 (0.8-2.8)                        | N/A                                                                      |
| <b>Age in years</b>                      |                                                  |                                      |                                                                          |
| 15-59 (driving ages)                     | 497/1046                                         | ref                                  |                                                                          |
| <15 (children)                           | 144/74                                           | 2.9 (1.8-4.5)                        | 94 } 170 (21%)                                                           |
| >59 (elderly adults)                     | 184/160                                          | 1.7 (1.2-2.4)                        |                                                                          |
| <b>Sex</b>                               |                                                  |                                      |                                                                          |
| Male                                     | 621/1121                                         | ref                                  |                                                                          |
| Female                                   | 204/159                                          | 1.5 (1.1-2.2)                        | 68 (8%)                                                                  |
| <b>Location</b>                          |                                                  |                                      |                                                                          |
| Rural                                    | 643/962                                          | ref                                  |                                                                          |
| Urban                                    | 182/318                                          | 1.5 (1.1-2.2)                        | 61 (7%)                                                                  |
| <b>Occupation</b>                        |                                                  |                                      |                                                                          |
| Salaried / Wage Earner / Professional    | 229/517                                          | ref                                  |                                                                          |
| Cultivator / Agricultural labour / Other | 162/300                                          | 0.9 (0.6-1.3)                        | N/A                                                                      |
| Non-worker / Children <15 years          | 433/463                                          | 1.2 (0.9-1.6)                        | N/A                                                                      |
| Unknown                                  | 1/0                                              | N/A                                  | N/A                                                                      |
| <b>Routine Alcohol Use**</b>             |                                                  |                                      |                                                                          |
| No                                       | 494/877                                          | ref                                  |                                                                          |
| Yes                                      | 145/260                                          | 1.1 (0.7-1.5)                        | N/A                                                                      |
| Unknown                                  | 42/69                                            | 1.0 (0.5-1.9)                        | N/A                                                                      |

**Table 2: Characteristics of pedestrian RTI deaths and attributable proportions.** \*Education of deceased adults or, in cases of deceased children <15 years, education of respondent. \*\*Excludes 218 children. ^Odds ratios are adjusted for all other variables in this table except for alcohol use; the odds ratios for alcohol use are adjusted for all other variables in this table.

## DISCUSSION

RTI is an important cause of death in India, causing 183 600 deaths in 2005, or about 2% of all deaths.[22] Much of the deceased were men between ages 15-59 years. Males had a four-fold higher cumulative risk of RTI death compared to females before the age of 70. Among the major



1  
2  
3 states, there was approximately 3-fold variation in the age-standardized RTI death rate and  
4  
5 cumulative risk for males.  
6  
7

8  
9  
10 Our estimated number of RTI deaths is more than 50% greater than the 118 265 deaths  
11 reported in the official police statistics of the National Crime Records Bureau (NCRB) in  
12 2005.[27] Compared to our estimates, the extent of under-reporting of the crude death rate in  
13 major states by NCRB ranged from <1% to about 80% (supplementary table 3). Existing  
14 regional population-based injury surveys in India support our findings and also report higher  
15 crude RTI death rates than NCRB statistics.[8,11]Under-reporting of RTI deaths in police  
16 statistics has been reported in India and other LMIC.[28-30]A study in urban India comparing  
17 both hospital- and community-based RTI data to police records identified factors contributing to  
18 under-reporting that included the deceased believed to be at fault, collision resulting from hit-  
19 and-runs, limited police resources, and the lack of a standard police reporting protocol by  
20 hospitals.[28] The factors contributing to police under-reporting, especially in rural India, require  
21 further examination. Our estimated number of RTI deaths in 2005 was consistent with the WHO  
22 estimate for 2004.[14] However, we observed a slightly higher male proportion (83% MDS vs.  
23 77% WHO, all ages) and a higher proportion of male deaths between 15-59 years (65% MDS  
24 vs. 61% WHO).  
25  
26  
27  
28  
29  
30  
31  
32  
33  
34  
35  
36  
37  
38  
39  
40  
41  
42  
43

44 Almost three-quarters of all RTI deaths in India were of pedestrians and other vulnerable road  
45 users. In contrast, a much lower proportion (27%) was reported by the NCRB (figure 2).This  
46 difference equated to 59 000 pedestrian and 32 000 other vulnerable road user deaths that were  
47 not included in the 2005 NCRB records. Existing RTI studies based on regional surveys and  
48 hospital series also reported a high proportion (>60%) of vulnerable road user deaths similar to  
49 our findings.[11,12,30-32]Since the majority of vulnerable road users were pedestrians, our  
50 findings suggested that RTI deaths in individuals who were less educated, poor, female or live in  
51  
52  
53  
54  
55  
56  
57  
58  
59  
60

1  
2  
3 urban areas may have been disproportionately excluded from the NCRB records. While poverty  
4 and education are not likely to be in the direct causal pathway of pedestrian deaths, they  
5 nonetheless point to other associated risk factors. Indeed, 55 000 pedestrian deaths in 2005  
6 (81%) was associated with lower education or living in poorer neighbourhoods compared to non-  
7 pedestrian RTI deaths. While the less educated and the poor likely travelled more often by foot,  
8 they might also be exposed to undetermined environmental (neighbourhoods with unsafe  
9 roads), biological (poor vision or decreased mobility due to poor health), and behavioral (alcohol  
10 or other substance use) risk factors for pedestrian death.[12, 33, 34]Further studies are needed  
11 to better understand pedestrian deaths in LMIC.  
12  
13  
14  
15  
16  
17  
18  
19  
20  
21  
22  
23  
24

25 Over half of RTI deaths occurred instantly at the scene of collision and/or had head injury  
26 reported. These findings, together with existing RTI hospital series and regional surveys in India,  
27 make a strong argument that investments in primary and secondary prevention could potentially  
28 avert the greatest proportion of RTI deaths. To address the high proportion of instant deaths and  
29 head injuries among RTI deaths in India, specific interventions that are effective and based on  
30 studies in LMIC should be emphasized; these may include speed bumps, motorcycle helmets,  
31 and increasing fines and license suspensions for rule infractions.[33]In contrast, improving pre-  
32 hospital transport and hospital trauma care, could only potentially affect the 38%who died on  
33 scene with delayed hospital transport (3%), en route to hospital (7%), or in hospital (28%).  
34  
35  
36  
37  
38  
39  
40  
41  
42  
43  
44  
45

46 Our study is the first nationally representative survey of the causes of death in India. The simple  
47 descriptive statistics provide clear evidence on the large and avertable burden from RTI,  
48 particularly among productive age adults and pedestrians. To the best of our knowledge, only  
49 one recent study in Vietnam has used similar methods to analyze RTI deaths and policy  
50 implications on a national scale.[35]  
51  
52  
53  
54  
55  
56  
57  
58  
59  
60

1  
2  
3 Our study faced certain limitations. First, we might have misclassified certain causes of death  
4 including suicide as RTI deaths. However, the extent of misclassification should be minimal  
5 since the RHIME verbal autopsy method was shown to be robust in discerning between types of  
6 injury deaths[36]and since the immediate two-physician agreement was high for RTI  
7 deaths(89.5%, table 1). Furthermore, suicides cause about 200 000 deaths in India annually but  
8 few are due to RTI.[19] Second, since the modes of transportation, place and timing of death,  
9 and injuries sustained were extracted from layperson open-ended narratives, the data accuracy  
10 may be in question. For example with the deceased mode of transportation, the extent of  
11 misclassification (by our study) or misreporting (by NCRB) that contributed to the differences  
12 between the two sources is uncertain. With reported injuries, our findings from these narratives  
13 most likely undercounted less visible injuries (chest, abdomen, and spine) compared to highly  
14 visible injuries such as bleeding and deformity for head and extremity injuries. Nevertheless, our  
15 findings are consistent with available Indian regional surveys and hospital series on the mode of  
16 transportation[11,12,30-32,37] place and timing of death,[1,37-41] and injuries  
17 sustained.[12,37,42,43]Third, since the narrative was not designed specifically to capture RTI  
18 death characteristics, over 25% of deaths had missing data for mode of transportation, place of  
19 death, timing of death, or reported injuries(supplementary table 1).Thus, our findings for these  
20 elements extracted from the narratives may be less representative of the decedents who lived in  
21 rural or poor areas. Finally, reliable forward projection of the number of RTI deaths beyond 2005  
22 was not possible since the increase in the NCRB reported number of RTI deaths of140% from  
23 2005 to 2011 appeared to outpace the rate of population growth.[44] As the proportion of  
24 vulnerable road user deaths remained stable during this period in the NCRB reports, we  
25 postulated that this increase represented an actual increase in RTI death totals rather than more  
26 accurate reporting. Furthermore, given the rapid economic expansion and concurrent changes  
27 in motorization including the types of vehicle sharing the road and road infrastructure,[45,46]our  
28 results on deceased mode of transportation, place and timing of death, and injuries sustained  
29  
30  
31  
32  
33  
34  
35  
36  
37  
38  
39  
40  
41  
42  
43  
44  
45  
46  
47  
48  
49  
50  
51  
52  
53  
54  
55  
56  
57  
58  
59  
60

1  
2  
3 may not reflect the current Indian scenario. An analysis of the trend from 2001-2014 is planned  
4  
5 pending ongoing data collection in the MDS.  
6  
7

8  
9  
10 In India, RTI is a significant cause of preventable death, particularly in males of productive  
11  
12 working age and among pedestrians, bicyclists, and motorcyclist. We have shown that properly  
13  
14 designed simple verbal autopsy narratives can document the much needed surveillance data on  
15  
16 the numbers, rates, risks, and basic RTI mechanism such as modes of transportation, timing of  
17  
18 death, place of death, and injuries sustained. Our findings suggested that investment in primary  
19  
20 and secondary prevention could address a large proportion of avoidable RTI deaths.  
21  
22

## 23 24 25 **ACKNOWLEDGEMENTS**

26  
27 We thank the Office of the RGI for the ongoing productive collaboration on the MDS, C  
28  
29 Ramasundarahettige for technical assistance, M Puri and S Levitt for data extraction. The  
30  
31 opinions expressed in this article are those of the authors and do not necessarily represent  
32  
33 those of the Government of India or the RGI.  
34  
35

## 36 37 38 **COMPETING INTERESTS**

39  
40 We declare that we have no competing interests.  
41  
42

## 43 44 45 **FUNDING**

46  
47 This study is supported by grants from the John E Fogarty International Center of the National  
48  
49 Institutes of Health (R01-TW05991-01 and TW07939-01), the Bill & Melinda Gates Foundation  
50  
51 through the Disease Control Priorities Network Project, and the University of Toronto (to PJ); the  
52  
53 Canada Research Chair Programme (to PJ and ABN); and the Canadian Institutes of Health  
54  
55 Research Doctoral Award (to MH). The funding sources had no role in the study design; data  
56  
57 collection, analysis, interpretation; writing of the manuscript; or decision to submit for publication.  
58  
59  
60

1  
2  
3 The senior author had full access to all the data in the study and had final responsibility for the  
4  
5 decision to submit this study for publication.  
6  
7  
8

### 9 10 **AUTHOR'S CONTRIBUTION**

11 PJ and the MDS Collaborators (appendix) designed, planned, the executed the MDS in close  
12  
13 collaboration with the Office of the Registrar General of India (RGI). MH and PJ performed the  
14  
15 data analysis. All authors contributed to data interpretation, revisions of the manuscript, and  
16  
17 provided final approval. PJ is the guarantor for this report.  
18  
19  
20

### 21 22 23 **DATA SHARING STATEMENT**

24  
25 Data used in this study are the property of the Registrar General of India and the overall  
26  
27 mortality results have been published in 2009.[47] This specific analyses is produced under an  
28  
29 agreement with CGHR.  
30  
31  
32  
33  
34  
35  
36  
37  
38  
39  
40  
41  
42  
43  
44  
45  
46  
47  
48  
49  
50  
51  
52  
53  
54  
55  
56  
57  
58  
59  
60

## REFERENCES

- 1 Peden M, Scurfield R, Sleet D, *et al*. World report on road traffic injury prevention: World Health Organization 2004;1–244.
- 2 Chisholm D, Naci H, Hyder AA, *et al*. Cost effectiveness of strategies to combat road traffic injuries in sub-Saharan Africa and South East Asia: mathematical modelling study. *BMJ* 2012;**344**:e612.
- 3 The PLoS Medicine Editors. Preventing Road Deaths—Time for Data. *PLoS Med* 2010;**7**:e1000257.
- 4 Barffour M, Gupta S, Gururaj G, *et al*. Evidence-based road safety practice in India: assessment of the adequacy of publicly available data in meeting requirements for comprehensive road safety data systems. *Traffic Inj Prev* 2012;**13 Suppl 1**:17–23.
- 5 Kopits E, Cropper ML. *Traffic fatalities and economic growth*. World Bank Development Research Group Environment and Infrastructure, 2003.
- 6 Sathiyasekaran BW. Population-based cohort study of injuries. *Injury* 1996;**27**:695–8.
- 7 Varghese M, Mohan D. Transportation injuries in rural Haryana, North India. *In: Proceedings of the international conference on traffic safety 2003*;326–9.
- 8 WHO. Injury Prevention and Control: An epidemiological study of injuries in the area of Municipal Corporation of Delhi. *Regional Office for South-East Asia* 2003;1–18.
- 9 Gururaj G, Suryanarayana SP. Burden and impact of injuries: Results of population-based survey. *Proceedings of the 7th world conference on injury prevention 2004*;275–6.
- 10 Dandona R. Patterns of road traffic injuries in a vulnerable population in Hyderabad, India.

- 1  
2  
3  
4  
5  
6  
7  
8  
9  
10  
11  
12  
13  
14  
15  
16  
17  
18  
19  
20  
21  
22  
23  
24  
25  
26  
27  
28  
29  
30  
31  
32  
33  
34  
35  
36  
37  
38  
39  
40  
41  
42  
43  
44  
45  
46  
47  
48  
49  
50  
51  
52  
53  
54  
55  
56  
57  
58  
59  
60
- Injury Prevention* 2006;**12**:183–8.
- 11 Dandona R, Kumar GA, Ameer MA, *et al.* Incidence and burden of road traffic injuries in urban India. *Inj Prev* 2008;**14**:354–9.
- 12 Gururaj G. Road traffic deaths, injuries and disabilities in India: current scenario. *Natl Med J India* 2008;**21**:14–20.
- 13 Garg N, Hyder A. Road traffic injuries in India: A review of the literature. *Scand J of Public Health* 2006;**34**:100–9.
- 14 World Health Organization. *The Global Burden of Disease: 2004 Update*. World Health Organization 2008.
- 15 Mathers CD, Bernard C, Moesgaard Iburg K, *et al.* Global Burden of Disease in 2002: data sources, methods, and results. Global Programme on Evidence for Health Policy Discussion Paper No. 54. World Health Organization 2003.
- 16 Jha P, Gajalakshmi V, Gupta PC, *et al.* Prospective Study of One Million Deaths in India: Rationale, Design, and Validation Results. *PLoS Med* 2006;**3**:e18.
- 17 Million Death Study Collaborators,. Causes of neonatal and child mortality in India: a nationally representative mortality survey. *Lancet* 2010;**376**:1853–60.
- 18 Dikshit R, Gupta PC, Ramasundarahettige C, *et al.* Cancer mortality in India: a nationally representative survey. *Lancet* 2012;**379**:1807–16.
- 19 Patel V, Ramasundarahettige C, Vijayakumar L, *et al.* Suicide mortality in India: a nationally representative survey. *Lancet* 2012;**379**:2343–51.
- 20 Sinha DN, Dikshit R, Kumar R, *et al.* Prospective Study of Million Deaths in India: Technical

- document no VIII: Health care professional's manual for assigning causes of death based on RHIME household reports. RGI-CGHR, University of Toronto. 2011.<http://www.cghr.org/mds> (accessed 1 Aug2012).
- 21 WHO. *International Statistical Classification of Diseases and Related Health Problems, ICD-10: Three Volume Set*. World Health Organization 2010.
- 22 United Nations Populations Division. World population prospects (2008 revision). 2009.<http://www.un.org/esa/population/publications/wpp2008/> (accessed 2 July 2011).
- 23 Mari Bhat PN. Completeness of India's sample registration system: an assessment using the general growth balance method. *Popul Stud* 2002;**56**:119–34.
- 24 Sivanandan V. *An assessment of the completeness of death registration in India over the periods 1975-1978 and 1996-1999 under the generalized population model: an analysis based on SRS data*. Mumbai: International Institute for Population Sciences2004.
- 25 Jha P, Kumar R, Khera A, *et al*. HIV mortality and infection in India: estimates from nationally representative mortality survey of 1.1 million homes. *BMJ* 2010;**340**:c621.
- 26 Dhingra N, Jha P, Sharma VP, *et al*. Adult and child malaria mortality in India: a nationally representative mortality survey. *Lancet* 2010;**376**:1768–74.
- 27 National Crime Records Bureau. *Accidental Deaths and Suicides in India, 2005*. Ministry of Home Affairs, Government of India2005.
- 28 Dandona R, Kumar GA, Ameer MA, *et al*. Under-reporting of road traffic injuries to the police: results from two data sources in urban India. *Inj Prev* 2008;**14**:360–5.
- 29 Alcorn T. Uncertainty clouds China's road-traffic fatality data. *Lancet* 2011;**378**:305–6.



- 1  
2  
3 30 Naci H, Chisholm D, Baker TD. Distribution of road traffic deaths by road user group: a  
4 global comparison. *Inj Prev* 2009;**15**:55–9.  
5  
6  
7  
8  
9 31 Mohan D. *The road ahead: Traffic injuries and fatalities in India*. Transportation research  
10 and injury prevention programme, Indian Institute of Technology, Delhi2004.  
11  
12  
13  
14 32 Mohan D. Traffic safety and health in Indian cities. *Journal of Transport and Infrastructure*  
15 2002;**9**:79–94.  
16  
17  
18  
19 33 Norton R, Hyder A, Bishai D, *et al*. Unintentional Injuries. In: *Disease Control Priorities in*  
20 *Developing Countries*. Oxford University Press, USA2006.  
21  
22  
23  
24  
25 34 Grimm M, Treibich C. Determinants of road traffic crash fatalities across Indian states.  
26 *Health Econ* Published Online First: 30 August 2012. doi:10.1002/hec.2870  
27  
28  
29  
30 35 Ngo AD, Rao C, Phuong Hoa N, *et al*. Road traffic related mortality in Vietnam: Evidence  
31 for policy from a national sample mortality surveillance system. *BMC Public Health*  
32 2012;**12**:561.  
33  
34  
35  
36  
37 36 Hsiao M, Morris SK, Bassani DG, *et al*. Factors Associated with Physician Agreement on  
38 Verbal Autopsy of over 11500 Injury Deaths in India. *PLoS ONE* 2012;**7**:e30336.  
39  
40  
41  
42 43 Singh H, Dhatarwal SK. Pattern and distribution of injuries in fatal road traffic accidents in  
44 Rohtak (Haryana). *Journal of Indian Academy of Forensic Medicine* 2004;**26**:20–3.  
45  
46  
47  
48 48 Dandona R, Mishra A. Deaths due to road traffic crashed in Hyderabad city in India: need  
49 for strengthening surveillance. *Natl Med J India* 2004;**17**:74–9.  
50  
51  
52  
53 53 39 Sahdev P, Lacqua MJ, Singh B, *et al*. Road traffic fatalities in Delhi: causes, injury patterns,  
54 and incidence of preventable deaths. *Accident Analysis & Prevention* 1994;**26**:377–84.  
55  
56  
57  
58  
59  
60

- 1  
2  
3 40 Bhattacharjee J, Bora D, Sharma RS, *et al.* Unnatural deaths in Delhi during 1991. *Med Sci*  
4 *Law* 1996;**36**:194–8.  
5  
6  
7  
8  
9 41 Jain A, Menezes RG, Kanchan T, *et al.* Two wheeler accidents on Indian roads--a study  
10 from Mangalore, India. *J Forensic Leg Med* 2009;**16**:130–3.  
11  
12  
13  
14 42 Gururaj G, Shastry KVR, Chandramouli AB, *et al.* *Traumatic brain injury*. Bangalore:  
15 National Institute of Mental Health and Neuro Sciences, 2005.  
16  
17  
18  
19 43 Colohan AR, Alves WM, Gross CR, *et al.* Head injury mortality in two centers with different  
20 emergency medical services and intensive care. *J Neurosurg Pediatrics* 1989;**71**:202–7.  
21  
22  
23  
24 44 National Crime Records Bureau. *Accidental Deaths and Suicides in India, 2011*. Ministry of  
25 Home Affairs, Government of India 2011.  
26  
27  
28  
29  
30 45 Transport Research Wing, Ministry of Road Transport & Highways. Basic Road Statistics of  
31 India. Government of India 2012.  
32  
33  
34  
35 46 Transport Research Wing, Ministry of Road Transport & Highways. Road Transport Year  
36 Book (2009-10 & 2010-11). Government of India 2012.  
37  
38  
39  
40 47 Registrar General of India and Centre for Global Health Research. *Causes of Death in*  
41 *India, 2001-2003: Sample Registration System*. Government of India 2009.  
42  
43  
44  
45  
46  
47  
48  
49  
50  
51  
52  
53  
54  
55  
56  
57  
58  
59  
60

## FIGURE LEGENDS

### **Figure 1: Road traffic injury deaths, age-standardized death rate, and cumulative risk (age 0-69 years) across states and regions of India, by gender.**

Death rates are standardized to the 2005 United Nations estimated Indian population. Symbol size is proportional to sample size. Northeast states include Sikkim, Arunachal Pradesh, Nagaland, Manipur, Mizoram, Tripura, and Meghalaya. Total estimates include the 80 male and 19 female deaths from Pondicherry, Chandigarh, Uttarakhand, Dadra & Nagar Haveli, A&N Islands, Daman & Diu, Lakshadweep, and Goa. CHT=Chhatisgarh.

### **Figure 2: Deceased mode of transportation, place of death, and timing of death.**

(A) Deceased mode of transportation in present study compared to National Crime Records Bureau 2005 Report. Shaded line represents vulnerable road users (defined as road users without a rigid barrier protecting against traumatic forces, i.e. pedestrian, bicyclist, motorcyclist, and three wheelers). Percentages from present study are weighted by state and rural/urban residence. T=estimated/reported number of deaths in 2005 (in thousands). (B) Place of death and (C) timing of death based on verbal autopsy narratives. Shaded lines represent deaths that are reported as occurring at the scene of collision or occurring instantly (defined as within 5 minutes).

### **Figure 3: Reported injuries from 1124 verbal autopsy narratives (49% of all 2299 RTI deaths).**

Percentages refer to those in each row with given injury (columns). \*Values in bold denote two by two chi square tests with  $p < 0.05$  (excluding unknowns). Abdominal and spinal injuries were also reported but not shown due to small numbers (61 and 25 cases, respectively).

**LIST OF ACRONYMS**

|        |                                                                                                             |
|--------|-------------------------------------------------------------------------------------------------------------|
| CI     | Confidence interval                                                                                         |
| ICD-10 | International Statistical Classification of Diseases and Related Health Problems, 10 <sup>th</sup> Revision |
| LMIC   | Low- and middle-income countries                                                                            |
| MDS    | Million Death Study                                                                                         |
| NCRB   | National Crime Records Bureau                                                                               |
| RGI    | Registrar General of India                                                                                  |
| RTI    | Road traffic injury                                                                                         |
| SRS    | Sample registration system                                                                                  |
| UN     | United Nations                                                                                              |
| WHO    | World Health Organization                                                                                   |

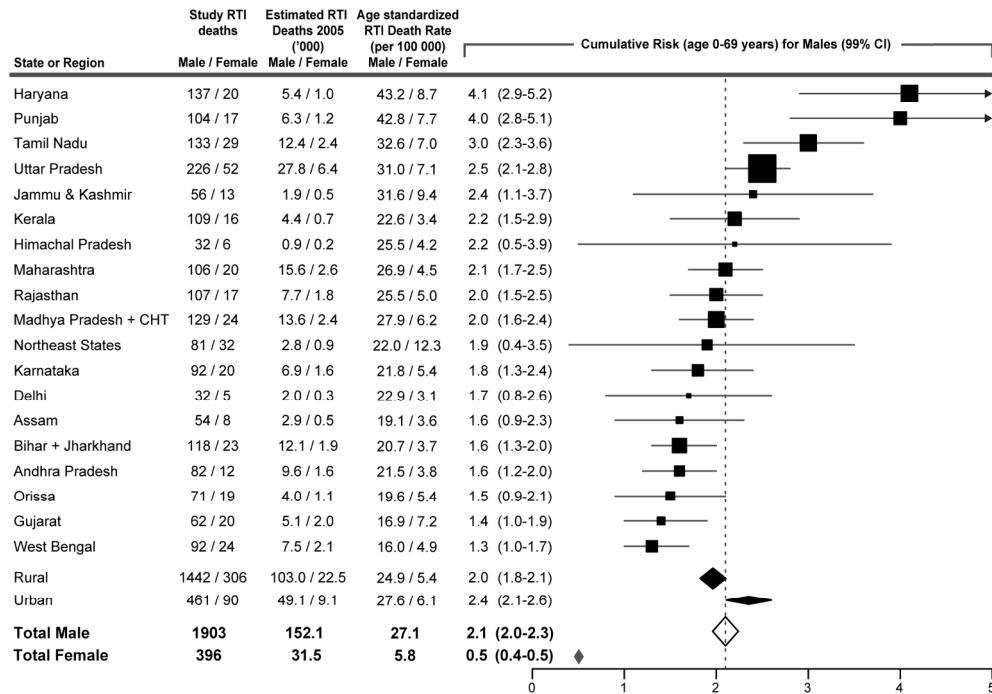

Figure 1: Road traffic injury deaths, age-standardized death rate, and cumulative risk (age 0-69 years) across states and regions of India, by gender.

Death rates are standardized to the 2005 United Nations estimated Indian population. Symbol size is proportional to sample size. Northeast states include Sikkim, Arunachal Pradesh, Nagaland, Manipur, Mizoram, Tripura, and Meghalaya. Total estimates include the 80 male and 19 female deaths from Pondicherry, Chandigarh, Uttarakhand, Dadra & Nagar Haveli, A&N Islands, Daman & Diu, Lakshadweep, and Goa. CHT=Chhatisgarh.

160x111mm (300 x 300 DPI)

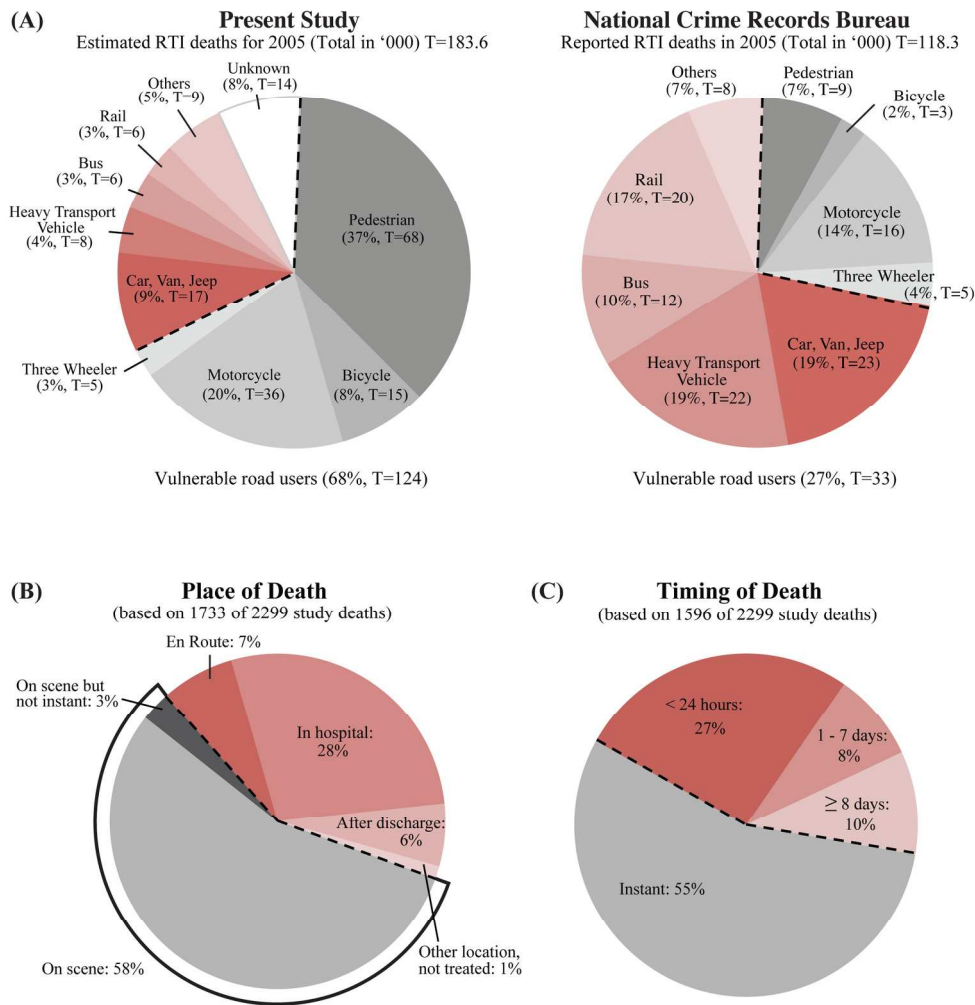

Figure 2: Deceased mode of transportation, place of death, and timing of death. (A) Deceased mode of transportation in present study compared to National Crime Records Bureau 2005 Report. Shaded line represents vulnerable road users (defined as road users without a rigid barrier protecting against traumatic forces, i.e. pedestrian, bicyclist, motorcyclist, and three wheelers). Percentages from present study are weighted by state and rural/urban residence. T=estimated/reported number of deaths in 2005 (in thousands). (B) Place of death and (C) timing of death based on verbal autopsy narratives. Shaded lines represent deaths that are reported as occurring at the scene of collision or occurring instantly (defined as within 5 minutes).

178x182mm (300 x 300 DPI)

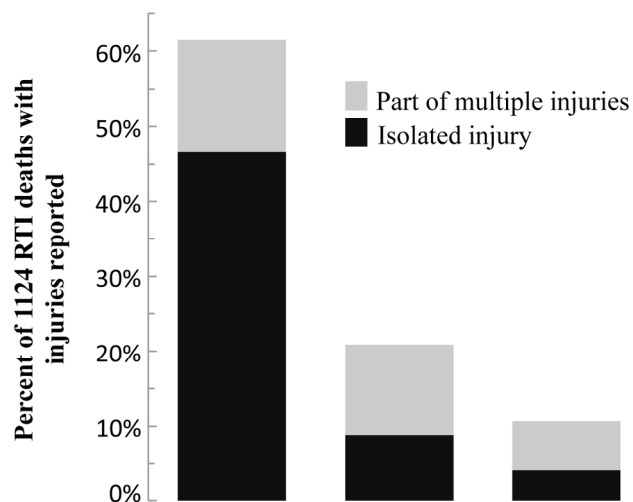

|                                                   | Head<br>n (%)    | Extremity<br>n (%) | Chest<br>n (%) |
|---------------------------------------------------|------------------|--------------------|----------------|
| <b>RTI deaths with reported injuries (N=1124)</b> | 691 (62)         | 235 (21)           | 120 (11)       |
| <b>Sex</b>                                        |                  |                    |                |
| Male (N=931)                                      | 584 (63)         | 194 (21)           | 105 (11)       |
| Female (N=193)                                    | 107 (55)         | 41 (21)            | 15 (8)         |
| <b>Place of Death</b>                             |                  |                    |                |
| Pre-hospital (N=492)                              | 322 (65)         | <b>56 (11)*</b>    | 44 (9)         |
| Hospital or other (N=457)                         | 291 (64)         | <b>142 (31)*</b>   | 58 (13)        |
| Unknown (N=175)                                   | 78 (45)          | 37 (21)            | 18 (10)        |
| <b>Timing of Death</b>                            |                  |                    |                |
| Instant (N=347)                                   | 216 (62)         | <b>28 (8)*</b>     | 29 (8)         |
| Later (N=521)                                     | 344 (66)         | <b>145 (28)*</b>   | 62 (12)        |
| Unknown (N=256)                                   | 131 (51)         | 62 (24)            | 29 (11)        |
| <b>Mode of Transportation</b>                     |                  |                    |                |
| Motorcycle (N=241)                                | <b>188 (78)*</b> | 51 (21)            | 18 (7)         |
| Non-motorcycle (N=807)                            | <b>457 (57)*</b> | 160 (20)           | 95 (12)        |
| Unknown (N=76)                                    | 46 (61)          | 24 (32)            | 7 (9)          |

Figure 3: Reported injuries from 1124 verbal autopsy narratives (49% of all 2299 RTI deaths). Percentages refer to those in each row with given injury (columns). \*Values in bold denote two by two chi square tests with  $p < 0.05$  (excluding unknowns). Abdominal and spinal injuries were also reported but not shown due to small numbers (61 and 25 cases, respectively).

141x191mm (300 x 300 DPI)

|                               | Narrative section |                      |       | Timing of Death  |                      |       | BMJ Open         |                      |       | Deceased Mode of Transportation |                      |       | Injury Reported  |                      |       |
|-------------------------------|-------------------|----------------------|-------|------------------|----------------------|-------|------------------|----------------------|-------|---------------------------------|----------------------|-------|------------------|----------------------|-------|
|                               | Missing<br>n (%)  | Not missing<br>n (%) | p     | Missing<br>n (%) | Not missing<br>n (%) | p     | Missing<br>n (%) | Not missing<br>n (%) | p     | Missing<br>n (%)                | Not missing<br>n (%) | p     | Missing<br>n (%) | Not missing<br>n (%) | p     |
| 1 <b>all RTI (n=2299)</b>     | 142 (6.2)         | 2157 (93.8)          |       | 703 (30.6)       | 1596 (69.4)          |       | 566 (24.6)       | 1733 (75.4)          |       | 194 (8.4)                       | 2105 (91.6)          |       | 1175 (51.1)      | 1124 (48.9)          |       |
| 2 <b>age</b>                  |                   |                      |       |                  |                      |       |                  |                      |       |                                 |                      |       |                  |                      |       |
| 3 <20 years                   | 12 (2.9)          | 402 (97.1)           | 0.002 | 106 (25.6)       | 308 (74.4)           | 0.015 | 90 (21.7)        | 324 (78.0)           | 0.133 | 37 (8.9)                        | 377 (91.1)           | 0.687 | 199 (48.1)       | 215 (51.9)           | 0.172 |
| 4 ≥20 years                   | 130 (6.9)         | 1755 (93.1)          |       | 597 (31.7)       | 1288 (68.3)          |       | 476 (25.3)       | 1409 (75.0)          |       | 157 (8.3)                       | 1728 (91.7)          |       | 976 (51.8)       | 909 (48.2)           |       |
| 5 <b>sex</b>                  |                   |                      |       |                  |                      |       |                  |                      |       |                                 |                      |       |                  |                      |       |
| 6 male                        | 118 (6.2)         | 1785 (93.8)          | 0.916 | 582 (30.6)       | 1321 (69.4)          | 0.991 | 461 (24.2)       | 1442 (75.8)          | 0.336 | 161 (8.5)                       | 1742 (91.5)          | 0.934 | 972 (51.1)       | 931 (48.9)           | 0.946 |
| 7 female                      | 24 (6.1)          | 372 (93.9)           |       | 121 (30.6)       | 275 (69.4)           |       | 105 (26.5)       | 291 (73.5)           |       | 33 (8.3)                        | 363 (91.7)           |       | 203 (51.3)       | 193 (48.7)           |       |
| 8 <b>location</b>             |                   |                      |       |                  |                      |       |                  |                      |       |                                 |                      |       |                  |                      |       |
| 9 rural                       | 125 (7.2)         | 1623 (92.9)          | 0.001 | 559 (32.0)       | 1189 (68.0)          | 0.009 | 456 (26.1)       | 1292 (73.9)          | 0.004 | 143 (8.2)                       | 1605 (91.8)          | 0.429 | 896 (51.3)       | 852 (48.7)           | 0.799 |
| 10 urban                      | 17 (3.1)          | 534 (96.9)           |       | 144 (26.1)       | 407 (73.9)           |       | 110 (20.0)       | 441 (80.0)           |       | 51 (9.3)                        | 500 (90.7)           |       | 279 (50.6)       | 272 (49.4)           |       |
| 11 <b>neighbourhood asset</b> |                   |                      |       |                  |                      |       |                  |                      |       |                                 |                      |       |                  |                      |       |
| 12 low                        | 126 (7.5)         | 1548 (92.5)          | 0.001 | 552 (33.0)       | 1122 (67.0)          | 0.000 | 451 (26.9)       | 1223 (73.1)          | 0.001 | 136 (8.1)                       | 1538 (91.9)          | 0.468 | 883 (52.8)       | 791 (47.3)           | 0.057 |
| 13 high                       | 16 (3.2)          | 487 (96.8)           |       | 121 (24.1)       | 382 (75.9)           |       | 97 (19.3)        | 406 (80.7)           |       | 46 (9.2)                        | 457 (90.9)           |       | 241 (47.9)       | 262 (52.1)           |       |
| 14 missing                    | 0 (0.0)           | 122 (100.0)          |       | 30 (24.6)        | 92 (75.4)            |       | 18 (14.8)        | 104 (85.3)           |       | 12 (9.8)                        | 110 (90.2)           |       | 51 (41.8)        | 71 (58.2)            |       |
| 15 <b>education</b>           |                   |                      |       |                  |                      |       |                  |                      |       |                                 |                      |       |                  |                      |       |
| 16 below primary              | 38 (4.0)          | 916 (96)             | 0.000 | 289 (30.3)       | 665 (69.7)           | 0.894 | 230 (24.1)       | 724 (75.9)           | 0.719 | 80 (8.4)                        | 874 (91.6)           | 0.757 | 468 (49.1)       | 486 (50.9)           | 0.094 |
| 17 primary and above          | 100 (7.7)         | 1196 (92.3)          |       | 396 (30.6)       | 900 (69.4)           |       | 321 (24.8)       | 975 (75.2)           |       | 104 (8.0)                       | 1192 (92.0)          |       | 682 (52.6)       | 614 (47.4)           |       |
| 18 missing                    | 4 (8.2)           | 45 (91.8)            |       | 18 (36.7)        | 31 (63.3)            |       | 15 (30.6)        | 34 (69.4)            |       | 10 (20.4)                       | 39 (79.6)            |       | 25 (51.0)        | 24 (49.0)            |       |
| 19 <b>occupation</b>          |                   |                      |       |                  |                      |       |                  |                      |       |                                 |                      |       |                  |                      |       |
| 20 non-worker                 | 60 (8.1)          | 679 (91.9)           | 0.006 | 243 (32.9)       | 496 (67.1)           | 0.094 | 205 (27.7)       | 534 (72.3)           | 0.016 | 60 (8.1)                        | 679 (91.9)           | 0.701 | 381 (51.6)       | 358 (48.4)           | 0.757 |
| 21 worker                     | 81 (5.2)          | 1478 (94.8)          |       | 459 (29.4)       | 1100 (70.6)          |       | 360 (23.1)       | 1199 (76.9)          |       | 134 (8.6)                       | 1425 (91.4)          |       | 793 (50.9)       | 766 (49.1)           |       |
| 22 missing                    | 1 (100.0)         | 0 (0.0)              |       | 1 (100.0)        | 0 (0.0)              |       | 1 (100.0)        | 0 (0.0)              |       | 0 (0.0)                         | 1 (100.0)            |       | 1 (100.0)        | 0 (0.0)              |       |

**Supplementary Table 1: Summary of missing data.** There are no missing values for age, sex, and location in the study population. The chi square test was used to determine the p values and excluded deaths with missing neighbourhood asset, education, or occupation.



| Deceased Mode of Transportation  | Timing of Death was Instant |             |         | Place of Death was Prehospital |             |         | Head Injury was Reported |             |                 |
|----------------------------------|-----------------------------|-------------|---------|--------------------------------|-------------|---------|--------------------------|-------------|-----------------|
|                                  | n (%)                       | Adjusted OR | 99% CI  | n (%)                          | Adjusted OR | 99% CI  | n (%)                    | Adjusted OR | 99% CI          |
| 1 non-vulnerable road users      | 170 (58.6)                  | ref         | --      | 223 (69.5)                     | ref         | --      | 125 (31.5)               | ref         | --              |
| 2 vulnerable road users:         |                             |             |         |                                |             |         |                          |             |                 |
| 3 pedestrian                     | 338 (58.5)                  | 1.1         | 0.7-1.7 | 425 (69.1)                     | 1.1         | 0.7-1.7 | 192 (24.9)               | 0.8         | 0.5-1.1         |
| 4 bicyclist & motorcyclist       | 245 (52.0)                  | 0.8         | 0.5-1.1 | 306 (59.2)                     | 0.6         | 0.4-1.0 | 256 (43.5)               | <b>1.7*</b> | <b>1.2-2.5*</b> |
| 5 three wheelers & animal riders | 93 (56.4)                   | 0.9         | 0.5-1.6 | 117 (67.6)                     | 0.9         | 0.5-1.7 | 72 (33.0)                | 1.2         | 0.7-1.9         |
| 6 unknown                        | 37 (40.2)                   | 0.5         | 0.3-1.0 | 55 (51.4)                      | 0.5         | 0.3-1.0 | 46 (25.1)                | 0.8         | 0.5-1.4         |

8 **Supplementary Table 2: Association between deceased mode of transportation and the timing of death, place of death, and head injuries reported.** Odds ratios  
9 are adjusted for deceased's age, sex, rural/urban, neighbourhood asset, and education. \*Value in bold denote statistically significant difference between comparison  
10 groups.  
11

For peer review only

12  
13  
14  
15  
16  
17  
18  
19  
20  
21  
22  
23  
24  
25  
26  
27  
28  
29  
30  
31  
32  
33  
34  
35  
36  
37  
38  
39  
40  
41  
42  
43  
44  
45  
46  
47  
48  
49

|    | 2005 UN<br>population<br>estimates (in '000) | Number of RTI<br>deaths in 2005* |        | Crude RTI Death<br>Rate in 2005<br>(per 100,000)* |      | % Under-reporting of<br>Crude RTI Death<br>Rate |          |
|----|----------------------------------------------|----------------------------------|--------|---------------------------------------------------|------|-------------------------------------------------|----------|
|    |                                              | MDS                              | NCRB   | MDS                                               | NCRB |                                                 |          |
|    |                                              |                                  |        |                                                   |      |                                                 | BMJ Open |
| 1  |                                              |                                  |        |                                                   |      |                                                 |          |
| 2  | Northeast States                             | 13211                            | 3610   | 724                                               | 27.3 | 5.5                                             | 79.9     |
| 3  | Punjab                                       | 26455                            | 7380   | 1622                                              | 27.9 | 6.1                                             | 78.0     |
| 4  | Bihar + Jharkhand                            | 122181                           | 13172  | 3430                                              | 10.8 | 2.8                                             | 74.0     |
| 5  | Uttar Pradesh                                | 186591                           | 33287  | 9860                                              | 17.8 | 5.3                                             | 70.4     |
| 6  | Jammu & Kashmir                              | 11120                            | 2335   | 857                                               | 21.0 | 7.7                                             | 63.3     |
| 7  | Other States                                 | 14121                            | 4037   | 1589                                              | 28.6 | 11.3                                            | 60.6     |
| 8  | Assam                                        | 29150                            | 3277   | 1456                                              | 11.2 | 5.0                                             | 55.6     |
| 9  | West Bengal                                  | 86499                            | 9363   | 4364                                              | 10.8 | 5.0                                             | 53.4     |
| 10 | Madhya Pradesh + CDH                         | 90568                            | 15726  | 7686                                              | 17.4 | 8.5                                             | 51.1     |
| 11 | Haryana                                      | 23688                            | 6128   | 3282                                              | 25.9 | 13.9                                            | 46.4     |
| 12 | Orissa                                       | 39485                            | 5083   | 2895                                              | 12.9 | 7.3                                             | 43.0     |
| 13 | Kerala                                       | 33785                            | 5051   | 3161                                              | 15.0 | 9.4                                             | 37.4     |
| 14 | Maharashtra                                  | 106386                           | 16638  | 10613                                             | 15.6 | 10.0                                            | 36.2     |
| 15 | Rajasthan                                    | 63375                            | 9237   | 6793                                              | 14.6 | 10.7                                            | 26.5     |
| 16 | Gujarat                                      | 55926                            | 6987   | 5264                                              | 12.5 | 9.4                                             | 24.7     |
| 17 | Himachal Pradesh                             | 6559                             | 1077   | 854                                               | 16.4 | 13.0                                            | 20.7     |
| 18 | Karnataka                                    | 57141                            | 8172   | 6876                                              | 14.3 | 12.0                                            | 15.9     |
| 19 | Delhi                                        | 16289                            | 2161   | 2023                                              | 13.3 | 12.4                                            | 6.4      |
| 20 | Tamil Nadu                                   | 66154                            | 14808  | 13961                                             | 22.4 | 21.1                                            | 5.7      |
| 21 | Andhra Pradesh                               | 81934                            | 10991  | 10944                                             | 13.4 | 13.4                                            | 0.4      |
| 22 | Total                                        | 1130618                          | 178520 | 98254                                             | 15.8 | 8.7                                             | 45.0     |

**Supplementary Table 3: Comparison between present study (MDS) estimates and National Crime Records Bureau (NCRB) police reports of the number of RTI deaths and crude death rate, by state.** \*Excludes railroad deaths since NCRB does not publish state-level railroad death figures. Northeast States include Sikkim, Arunachal Pradesh, Nagaland, Manipur, Mizoram, Tripura, and Meghalaya. Other States include Pondicherry, Chandigarh, Uttaranchal, Dadra & Nagar Haveli, A & N Islands, Daman & Diu, Lakshadweep, and Goa. CDH = Chhatisgarh. % under reporting = (MDS death rate - NCRB death rate) / MDS death rate \*100%.

1  
2  
3  
4  
5  
6  
7  
8  
9  
10  
11  
12  
13  
14  
15  
16  
17  
18  
19  
20  
21  
22  
23  
24  
25  
26  
27  
28  
29  
30  
31  
32  
33  
34  
35  
36  
37  
38  
39  
40  
41  
42  
43  
44  
45  
46  
47  
48  
49  
50  
51  
52  
53  
54  
55  
56  
57  
58  
59  
60

## MILLION DEATH STUDY COLLOBORATORS

### Indian Academic Partners (in alphabetical order):

61. Department of Community Medicine Gujarat Medical College, Ahmedabad: DV Bala, P Seth, KN Trivedi
72. Department of Community Medicine Kolkatta Medical College, Kolkatta: SK Roy
83. Department of Community Medicine Regional Institute of Medical Sciences, Imphal: L Usharani
94. Department of Community Medicine S.C.B. Medical College Cuttack, Orissa: Dr. B Mohapatra
10. Department of Community Medicine SMS Medical College Jaipur: AK Bharadwaj, R Gupta
16. Epidemiological Research Center, Chennai: V Gajalakshmi, CV Kanimozhi
17. Gandhi Medical College, Bhopal: RP Dikshit, S Sorangi
18. Healix-Seskarhia Institute of Public Health, Navi Mumbai: PC Gupta, MS Pednekar, S Sreevidya
19. Apollo Institute of Medical Sciences & Research, Hyderabad: P Bhatia
10. St. John's Academy of Health Sciences, Bangalore: A Kurpad, P Mony, M Vaz, S Srinivasan, A Shet, AS Shet, D Xavier, S Rathi, V Habbare
18. King George Medical College, Lucknow: S Awasthi
19. Najafgarh Rural Health Training Centre, Ministry of Health Government of India, New Delhi: N Dhingra, J Sudhir, I Rawat (until 2007)
213. Regional Medical Research Center, ICMR Institute, Bhubaneshwar: AS Karketta, SK Dar
24. School of Preventative Oncology, Patna: DN Sinha
25. School of Public Health Post Graduate Institute of Medical Education and Research, Chandigarh: N Kaur, R Kumar, JS Thakur
26. Tata Memorial Cancer Hospital, Mumbai: RA Badwe, RP Dikshit, M Mallath, K Panse, A Budukh

### Lead Partners:

29. Office of the Registrar-General India, RK Puram, New Delhi India: C Chandramouli (Registrar General of India [RGI]), C Sethi, B Mishra (until 2012), S Jain (until 2008), DK Dey, AK Saxena, MS Thapa, N Kumar; JK Banthia and DK Sikri (former RGIs)
33. Million Death Study Coordinating Centre for Global Health Research (CGHR) Li Ka Shing Knowledge Institute, St. Michael's Hospital, Dalla Lana School of Public Health, University of Toronto, Canada: P Jha (Principal Investigator), R Kamadod, S Rathi, S Rao-Seshadri, P Rodriguez, P Sati, J Sudhir, C Ramasundarahettige, W Suraweera

### Affiliated Partners:

38. Indian Council of Medical Research, New Delhi India: VM Katoch (Director General or DG from 2008), NK Ganguly (DG to 2008), L Kant, B Bhattacharya, B Shah, DK Shukla
41. World Health Organisation, Geneva and SEARO Office, New Delhi: T Boerma, A Fric, S Habayeb (former WHO Representative-India), S Khanum, CD Mathers, DN Sinha, N Singh, P Singh (Deputy Regional Director)
43. Clinical Trial Service Unit and Epidemiological Studies Unit (CTSUS), University of Oxford, England: N Bhala, J Boreham, R Peto, G Whitlock

1  
2  
3  
4  
5  
6  
7  
8  
9 **Road traffic injury mortality and its mechanisms in India: nationally**  
10 **representative mortality survey of 1.1 million homes**  
11

12 Marvin Hsiao, Ajai Malhotra, JS Thakur, Jay K Sheth, Avery B Nathens, Neeraj Dhingra,  
13 Prabhat Jha, for the Million Death Study Collaborators.  
14  
15

16  
17 Centre for Global Health Research, Li Ka Shing Knowledge Institute, St Michael's Hospital,  
18 University of Toronto, Toronto, Canada (M Hsiao MD, Prof P Jha DPhil); Division of General  
19 Surgery, Department of Surgery, University of Toronto, Toronto, Canada (M Hsiao MD, Prof AB  
20 Nathens MD); Department of Surgery, VCU Medical Center, Virginia Commonwealth University,  
21 Richmond, USA (Prof A Malhotra MD); Department of Community Medicine, Post Graduate  
22 Institute of Medical Education and Research, Chandigarh, India (JS Thakur MD); Smt. N.H.L.  
23 Municipal Medical College, Ahmedabad, India (JK Sheth MD); Sunnybrook Research Institute,  
24 Sunnybrook Health Sciences Centre, Toronto, Canada (Prof AB Nathens MD); National AIDS  
25 Control Organization, New Delhi, India (N Dhingra MD)  
26  
27  
28  
29

30  
31 Correspondence to:

32 Marvin Hsiao

33 Centre for Global Health Research, Li Ka Shing Knowledge Institute, St Michael's Hospital, and  
34 Division of General Surgery, Department of Surgery, University of Toronto

35 30 Bond Street, Toronto, Ontario, Canada M5B 1W8

36 [marvin.my.hsiao@gmail.com](mailto:marvin.my.hsiao@gmail.com)

37 +1 416-864-6042 (phone) / +1 416-864-5256 (fax)

38  
39 Keywords: Road traffic injury; verbal autopsy; India; low- and middle-income countries

40 | Word count: Text:~~3214~~3440  
41  
42  
43  
44  
45  
46  
47  
48  
49  
50  
51  
52  
53  
54

**ABSTRACT:**

**Objectives:** To quantify and describe the mechanism of road traffic injury (RTI) deaths in India.

**Design:** We conducted a nationally representative mortality survey where at least two physicians coded each non-medical field staff's verbal autopsy reports. RTI mechanism data were extracted from the narrative section of these reports.

**Setting:** 1.1 million homes in India.

**Participants:** Over 122 000 deaths at all ages from 2001-2003.

**Primary and secondary outcome measures:** Age- and sex-specific mortality rates, place and timing of death, modes of transportation, and injuries sustained.

**Results:** The 2299 RTI deaths in the survey correspond to an estimated 183 600 RTI deaths or about 2% of all deaths in 2005 nationally, of which 65% occurred in males between the ages of 15-59 years. The age-adjusted mortality rate was greater in males than in females, in urban than in rural areas, and was notably higher than that estimated from national police records. Pedestrians (68 000), motorcyclists (36 000), and other vulnerable road users (20 000) constituted 68% of RTI deaths (124 000) nationally. Among the study sample, the majority of all RTI deaths occurred at the scene of collision (1005/1733, 58%), within minutes of collision (883/1596, 55%), and/or involved a head injury (691/1124, 62%). Compared to non-pedestrian RTI deaths, about 55 000 (81%) of pedestrian deaths were associated with less education and living in poorer neighbourhoods.

**Conclusions:** In India, RTI cause a substantial number of deaths, particularly among pedestrians and other vulnerable road users. Interventions to prevent collisions and reduce injuries might address over half of the RTI deaths. Improved pre-hospital transport and hospital trauma care might address just over a third of the RTI deaths.

## ARTICLE SUMMARY

### Article focus

- To directly estimate the age- and sex-specific mortality rates and describe the place and timing of death, modes of transportation, and injuries sustained for road traffic injury (RTI) deaths in India using a nationally representative mortality survey of 1.1 million homes.

### Key messages

- Road traffic injuries cause a substantial number of avertable deaths, particularly in males of productive working age and among pedestrians and other vulnerable road users.
- Preventative interventions should be emphasized as the majority of all RTI deaths occurred at the scene of collision, within minutes of collision, and/or involved a head injury.
- Properly designed mortality survey with verbal autopsy narratives can provide much-needed data to assist RTI prevention efforts.

### Strengths and limitations of this study

- This study is the first nationally representative survey of the causes of death in India and overcomes limitations of existing data sources including regional injury surveys, hospital series, and national police reports.
- Limitations of the study include potential misclassification of deaths by physician coders, the use of layperson narratives with a potential for recall bias and inaccuracies, and limited ability to forward project study results given the rapid changes in motorization in India.

1  
2  
3  
4  
5  
6  
7  
8  
9  
10  
11  
12  
13  
14  
15  
16  
17  
18  
19  
20  
21  
22  
23  
24  
25  
26  
27  
28  
29  
30  
31  
32  
33  
34  
35  
36  
37  
38  
39  
40  
41  
42  
43  
44  
45  
46  
47  
48  
49  
50  
51  
52  
53  
54  
55  
56  
57  
58  
59  
60

## INTRODUCTION

Road traffic injuries (RTI) are a large and growing public health burden, especially in low-and middle-income countries (LMIC) where 90% of the world's ~~RTI~~ deaths due to RTI are estimated to occur.[1] There are few high-quality epidemiologic data on RTI to guide the development, implementation, and surveillance of evidence-based policy and programs in LMICs.[2-4]

The number of ~~RTI~~ deaths due to RTI in India is projected to rise with increasing motorization.[1,5] Aside from a few regional injury surveys,[6-11] the current data on the numbers and mechanisms of RTI deaths in India rely on police or hospital records, both of which can substantially underestimate death rates in the poor, rural, and uneducated people who still constitute large proportions of the Indian population.[2-4,12,13]

The World Health Organization (WHO), using indirect modeling methods, estimated about 202 000 RTI deaths in India in 2004.[14,15] No study has validated this estimate with direct measurement nor documented detailed RTI mechanism for India nationally. Here, we estimate the regional, age- and sex-specific mortality rate and risk of RTI death in India using data from the Million Death Study (MDS). We also report the modes of transportation, place and timing of death, and injuries sustained in RTI deaths.

## METHODS

**Study Design:** The MDS is an on-going nationally representative survey designed to determine the causes and risk factors of death in India, organized by the Registrar General of India (RGI). The design, methodology, and preliminary findings of the MDS have been described elsewhere.[16-19]In brief, the MDS used an enhanced version of verbal autopsy (known as the routine, reliable, representative, re-sampled household investigation of mortality with medical evaluation or RHIME) to monitor a nationally representative sample of 1.1 million households in the Sample Registration System (SRS). Within six months of every death occurring in these households from 2001-3, a trained, nonmedical RGI surveyor interviewed a relative or close-acquaintance of the deceased to obtain the symptoms and events around the death using structured questions and a local language narrative guided by a specific symptom list. These records were converted into electronic records and emailed to two of 140 trained physicians who, independently and anonymously, assigned an underlying cause of death (with allocation determined randomly based only on the physician's ability to read the local language), using guidelines for the major causes of death.[20]Records were assigned cause of death in three-digit International [Statistical Classification of Diseases and Related Health Problems](#), 10th revision (ICD-10).[21] Records where coders disagreed on the cause of death underwent anonymous reconciliation. Continuing disagreements were adjudicated by a third senior physician. Five percent of households were randomly resurveyed and the results were consistent within families of ICD-10 codes.[16] Participation in the SRS is on a voluntary basis and oral consent was obtained under the confidentiality and consent procedures of the Registration of Births and Deaths Act, 1969.

**Road Traffic Injury Deaths:** The RTI deaths in this study were of people who died between 2001 and 2003 with a final assigned ICD-10 code within V01-V89. We translated the open-ended narratives into English from 14 local languages, and systematically extracted the modes



1  
2  
3  
4  
5  
6  
7  
8  
9  
10  
11  
12  
13  
14  
15  
16  
17  
18  
19  
20  
21  
22  
23  
24  
25  
26  
27  
28  
29  
30  
31  
32  
33  
34  
35  
36  
37  
38  
39  
40  
41  
42  
43  
44  
45  
46  
47  
48  
49  
50  
51  
52  
53  
54  
55  
56  
57  
58  
59  
60

of transportation, place and timing of death, and injuries sustained from ~~the 2157 of the 2299~~ RTI narratives deaths using a standardized data extraction tool and procedure (the remaining 142 deaths, 6%, had missing or illegible narratives). For these four data elements, there were substantial inter-rater agreement (~~kappa statistic > 0.69~~) between two investigators and two research assistants who were trained and ~~independently extracted~~ independently extracted data from the narratives of a random 10% of RTI deaths (~~lowest kappa statistic was greater than 0.69 for all pair-wise comparisons between the four data~~ four data extractors; data not shown). The two research assistants then independently extracted data from all narratives. Adjudication was done by an investigator (M:H) for discrepancies in extracted data.

**Analysis:** The age and sex-specific proportion of RTI deaths within the 2001-2003 survey was applied to the 2005 United Nations (UN) estimates of the number of deaths from all causes in India, after weighting for sampling probability.[22] The 2005 UN death estimates were used so as to correct for the slight undercounts reported in the total death rates in the SRS[23,24] and to account for the 12% of enumerated deaths without completed field visits (mostly due to out-migration of the family or from incomplete field records). The proportion of these missed deaths was similarly dispersed across sex, age, and states. Use of 2003 or 2004 UN death totals yielded nearly identical results (data not shown). The 99% confidence intervals (99%CI) for mortality rate were calculated based on the weighted number of study deaths. State- and rural/urban-specific estimates of the number, mortality rate, and lifetime risk of RTI death were calculated by partitioning the UN national death totals according to relative SRS death rates as previously described.[18,25,26] Urban and rural status was defined according to the Census of India. Logistic regression was used to compare the socio-demographic traits of pedestrian and non-pedestrian RTI deaths. Household fuel type was used as a measure of community wealth, based on earlier principal component analyses [18]; high asset neighbourhoods had >50% of households that used gas, electricity, or kerosene; low asset or poor neighbourhoods used

1  
2  
3  
4  
5  
6  
7  
8  
9 primarily coal, firewood, or other. Attributable proportion was calculated for traits of pedestrian  
10 deaths compared to non-pedestrian RTI deaths.  
11

12  
13  
14 The MDS received ethics approval from the review boards of the Post-Graduate Institute of  
15 Medical Education and Research in Chandigarh, India; St Michael's Hospital in Toronto,  
16 Canada; and the Indian Council of Medical Research's Health Ministry's Screening Committee.  
17  
18  
19  
20  
21

## 22 **RESULTS**

23  
24 The 2299 RTI deaths in the 2001-2003 survey correspond to an estimated 183 600 (99%CI 173  
25 800-193 400) RTI deaths in India in 2005. The majority of these RTI deaths occurred in males  
26 (152 100 deaths, 82.8%; table 1). The age-standardized RTI mortality rate for males (26.2 per  
27 100 000, 24.6-27.7) was higher than for females (5.7 per 100 000, 5.0-6.4). While the RTI  
28 mortality rate increased with age in both genders, the largest number of RTI deaths occurred in  
29 males between 15-59 years of age (118 900, 64.8%).  
30  
31  
32  
33  
34  
35

36 At these death rates and in the theoretical absence of other causes of death, males in India had  
37 a 2.1% (2.0-2.3) risk of dying from RTI before age 70, with the highest risks at ages 30-59  
38 years; females had a 0.5% (0.4-0.5) risk of dying from RTI before age 70. Males in Haryana,  
39 Punjab, Tamil Nadu, and Uttar Pradesh had significantly higher risks (3.0-4.1%) than the  
40 national risk (figure 1). In contrast, males in Bihar, Jharkhand, Andhra Pradesh, Orissa, Gujarat,  
41 and West Bengal had significantly lower risks (1.3-1.6%) than the national risk of RTI deaths.  
42  
43  
44  
45  
46

47 Males living in urban areas had slightly higher age-standardized mortality rates and risks of RTI  
48 deaths (27.6 per 100 000; 2.4%, 2.1-2.6) compared to males living in rural areas (24.9 per 100  
49 000; 2.0%, 1.8-2.1). By contrast, female RTI mortality rates and risks before age 70 varied much  
50 less across states and were similar in rural and urban areas (data not shown).  
51  
52  
53  
54

1  
2  
3  
4  
5  
6  
7  
8  
9  
10  
11  
12  
13  
14  
15  
16  
17  
18  
19  
20  
21  
22  
23  
24  
25  
26  
27  
28  
29  
30  
31  
32  
33  
34  
35  
36  
37  
38  
39  
40  
41  
42  
43  
44  
45  
46  
47  
48  
49  
50  
51  
52  
53  
54  
55  
56  
57  
58  
59  
60

For peer review only

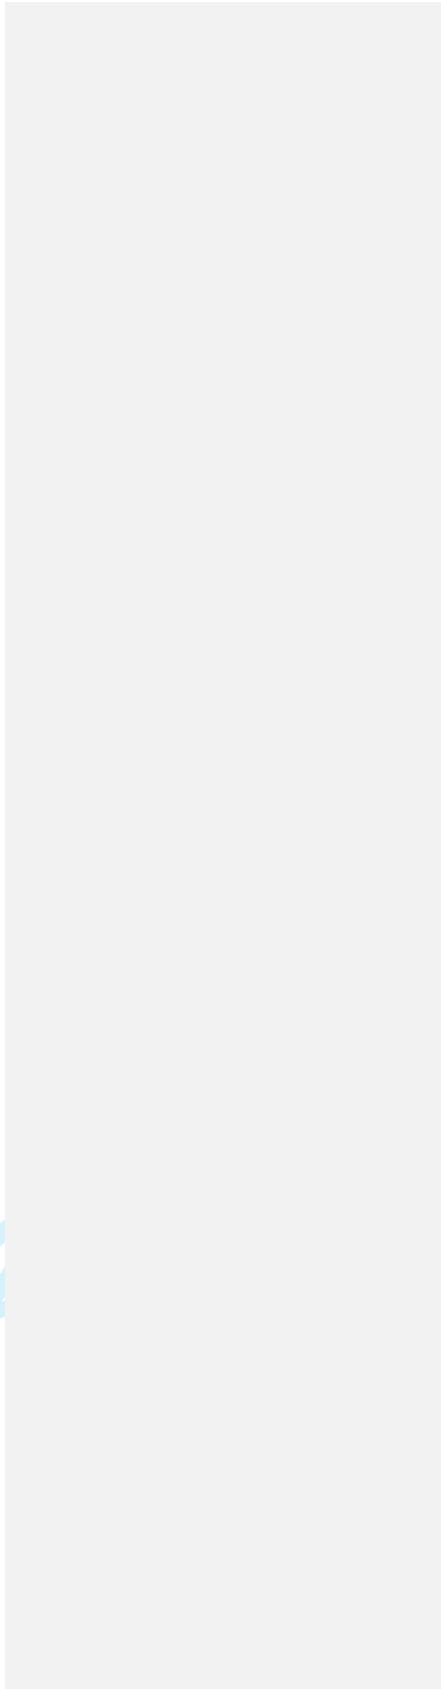

1  
2  
3  
4  
5  
6  
7  
8  
9  
10  
11  
12  
13  
14  
15  
16  
17  
18  
19  
20  
21  
22  
23  
24  
25  
26  
27  
28  
29  
30  
31  
32  
33  
34  
35  
36  
37  
38  
39  
40  
41  
42  
43  
44  
45  
46  
47  
48  
49

|                                            | Study deaths, 2001-2003                 |                 |             |                              | All India, 2005                                       |                                  |                                      |                            |
|--------------------------------------------|-----------------------------------------|-----------------|-------------|------------------------------|-------------------------------------------------------|----------------------------------|--------------------------------------|----------------------------|
|                                            | Number of RTI deaths / all coded deaths | Proportion RTI* | Rural (%**) | Two coders immediately agree | All deaths / population (millions, 2005 UN estimates) | Estimated RTI deaths§, thousands | RTI death rate¶ per 100 000 (99% CI) | Period risk for RTI death† |
| <b>Male - age in years</b>                 |                                         |                 |             |                              |                                                       |                                  |                                      |                            |
| 0-4                                        | 44 / 11719                              | 0.4%            | 37 (76.7)   | 44                           | 1.2 / 67                                              | 4.9                              | 7.4 (6.5-8.4)¶                       | 0.04%                      |
| 5-14                                       | 97 / 1926                               | 5.2%            | 86 (84.1)   | 87                           | 0.2 / 129                                             | 8.5                              | 6.6 (4.9-8.3)                        | 0.1%                       |
| 15-29                                      | 605 / 4727                              | 13.0%           | 462 (68.9)  | 558                          | 0.4 / 163                                             | 47.1                             | 28.9 (25.9-31.9)                     | 0.4%                       |
| 30-44                                      | 529 / 6817                              | 7.7%            | 385 (67.0)  | 477                          | 0.6 / 115                                             | 43.8                             | 37.9 (33.7-42.1)                     | 0.6%                       |
| 45-59                                      | 356 / 11731                             | 3.0%            | 249 (60.9)  | 312                          | 0.9 / 73                                              | 28.0                             | 38.4 (33.2-43.6)                     | 0.6%                       |
| 60-69                                      | 149 / 12120                             | 1.2%            | 117 (71.8)  | 133                          | 0.9 / 24                                              | 10.6                             | 44.0 (34.6-53.4)                     | 0.5%                       |
| >70                                        | 123 / 18732                             | 0.6%            | 106 (81.2)  | 98                           | 1.3 / 14                                              | 9.1                              | 64.5 (49.1-80.0)                     | --                         |
| All ages                                   | 1903 / 67772                            | 2.8%            | 1442 (68.9) | 1709                         | 5.3 / 585                                             | 152.1                            | 26.2                                 | 2.1%†                      |
| (% or 99% CI)                              |                                         |                 |             | (89.8%)                      |                                                       | (143.2-161.0)                    | (24.6-27.7)                          | (2.0-2.3)                  |
| <b>Female - age in years</b>               |                                         |                 |             |                              |                                                       |                                  |                                      |                            |
| 0-4                                        | 50 / 11492                              | 0.4%            | 46 (93.4)   | 45                           | 1.2 / 61                                              | 5.0                              | 8.1 (7.1-9.1)¶                       | 0.04%                      |
| 5-14                                       | 44 / 1955                               | 2.3%            | 38 (80.1)   | 43                           | 0.2 / 118                                             | 3.8                              | 3.2 (2.0-4.4)                        | 0.03%                      |
| 15-29                                      | 72 / 4394                               | 1.5%            | 53 (60.5)   | 63                           | 0.3 / 150                                             | 5.3                              | 3.5 (2.4-4.6)                        | 0.1%                       |
| 30-44                                      | 59 / 4055                               | 1.4%            | 39 (59.0)   | 50                           | 0.3 / 106                                             | 4.4                              | 4.1 (2.7-5.5)                        | 0.1%                       |
| 45-59                                      | 70 / 6402                               | 1.1%            | 55 (70.9)   | 61                           | 0.5 / 69                                              | 6.0                              | 8.6 (5.9-11.3)                       | 0.1%                       |
| 60-69                                      | 54 / 9016                               | 0.6%            | 42 (68.6)   | 52                           | 0.6 / 25                                              | 3.7                              | 14.8 (9.8-19.9)                      | 0.2%                       |
| >70                                        | 47 / 17343                              | 0.3%            | 33 (61.8)   | 35                           | 1.3 / 16                                              | 3.5                              | 21.6 (13.4-29.9)                     | --                         |
| All ages                                   | 396 / 54657                             | 0.7%            | 306 (69.8)  | 349                          | 4.5 / 546                                             | 31.5                             | 5.7                                  | 0.5%†                      |
| (% or 99% CI)                              |                                         |                 |             | (88.1%)                      |                                                       | (27.5-35.6)                      | (5.0-6.4)                            | (0.4-0.5)                  |
| <b>Total male and female, &lt;70 years</b> | 2129 / 86354                            | 2.4%            | 1609 (68.5) | 1925                         | 7.2 / 1100                                            | 171.0                            | 15.5                                 | 1.3%†                      |
| (% or 99% CI)                              |                                         |                 |             | (90.4%)                      |                                                       | (161.5-180.4)                    | (14.7-16.4)                          | (1.3-1.4)                  |
| <b>Total male and female, all ages</b>     | 2299 / 122429                           | 1.8%            | 1748 (69.0) | 2058                         | 9.8 / 1131                                            | 183.6                            | 16.2                                 | 1.3%†                      |
| (% or 99% CI)                              |                                         |                 |             | (89.5%)                      |                                                       | (173.8-193.4)                    | (15.4-17.1)                          | (1.3-1.4)                  |

**Table 1: Road traffic injury deaths in the present study and estimated national totals for 2005, by age and gender.** \*Proportion of RTI deaths compared to all deaths, weighted by state and residence (rural/urban). \*\*Percentage rural is weighted by state and residence (rural/urban). §Obtained by multiplying the United Nations estimated total deaths in 2005 by the weighted proportions. ¶Age standardized to the 2005 United Nations estimated Indian population; 99% CI shown are calculated based on weighted number of study deaths, which result in wider CI than those based on physician agreement. †Annual RTI death rate multiplied by the duration of age range, except for the lifetime risk which is calculated between 0-69 years by summation of the age specific period risks. ¶¶Crude death rate.

1  
2  
3  
4  
5  
6  
7  
8  
9 The deceased mode of transportation was described in the narratives of 2105 (92%) of the RTI  
10 deaths. National estimates for the deceased mode of transportation were calculated, as those  
11 with unknown and known modes of transportation did not appear to differ with respect to the  
12 major socio-demographic traits (Supplementary Table 1). Vulnerable road users are those  
13  
14 without a rigid barrier protecting against traumatic forces and include pedestrians, motorcyclists,  
15  
16 bicyclists, and three-wheelers. They constituted a majority (68%; n=124 000, 99%CI 115 000-  
17  
18 131 000) of RTI deaths, led by pedestrians (37%; n=68 000, 62 000-73 000) and motorcyclists  
19  
20 (20%; n=36 000, 31 000-40 000) (figure 2). Drivers and passengers of motorized four-wheelers  
21  
22 comprised 16% (n=31 000, 27 000-35 000) of RTI deaths. By contrast, the 2005 police reports,  
23  
24 which use a different but compatible classification system to ICD-10, recorded only 33000  
25  
26 vulnerable road user deaths and only 9000 pedestrian deaths.<sup>[27]</sup> The most common types of  
27  
28 vehicle to collide into the decedents were heavy transport vehicles and buses (37%; n=68 000,  
29  
30 61 000-74 000), followed by cars and vans (15%; n=28 000, 24 000-32 000). Single-vehicle  
31  
32 incidents comprised 9% of deaths (n=17 000, 14 000-20 000). The most frequent combinations,  
33  
34 resulting in 23% (n=42 000, 37 000-47 000) of RTI deaths, were collisions of heavy transport  
35  
36 vehicles or buses with pedestrians and motorcyclists (data not shown).

37  
38 The place and timing of death were described in the narratives of 1733 (75%) and 1596 (69%)  
39  
40 of the RTI deaths respectively (figure 2; see supplementary table 1 for a summary of missing  
41  
42 data from the narratives with respect to deceased characteristics). For these narratives, only the  
43  
44 study proportion and not national estimates were made. Most RTI deaths occurred at the scene  
45  
46 of collision (58%, 1005/1733) or instantly, defined as within 5 minutes (55%, 883/1596). Only 3%  
47  
48 (45/1733) were labeled as potentially avertable with better pre-hospital transport as they  
49  
50 occurred on scene but not instantly. Another 35% of deaths occurred en route (7%, 124/1733) or  
51  
52 in hospital (28%, 481/1733).

1  
2  
3  
4  
5  
6  
7  
8  
9 Injuries sustained by the deceased were reported from 1124 narratives (49%). Head injuries  
10 were the most commonly reported (62%, 691/1124), of which 76% (524/691) were reported as  
11 isolated head injuries (figure 3). A greater percentage of motorcyclists (78%, 188/241) had head  
12 injuries reported compared to non-motorcyclists (57%, 457/807). After adjusting for age, sex,  
13 rural/urban, neighbourhood asset, and education, bicyclists and motorcyclists were more likely  
14 to have head injuries reported compared to non-vulnerable road users (adjusted OR 1.7, 1.2-  
15 2.5) (supplementary table 2).  
16  
17  
18  
19  
20  
21

22 Compared to non-pedestrian RTI deaths, pedestrian deaths occurred to those who had less  
23 education (or in the case of children age <15 years, have less educated parents) (adjusted OR  
24 2.9, 99%CI 2.0-4.2), lived in poorer neighbourhoods (1.7, 1.1-2.5), were children or elderly adults  
25 (<15 years: 2.9, 1.8-4.5; >59 years: 1.7, 1.2-2.4), were female (1.5, 1.2-2.2), and lived in urban  
26 areas (1.5, 1.1-2.2) (table 2). If pedestrian deaths had the same proportion of secondary or  
27 higher education as non-pedestrian RTI deaths, there would be 406/825 (49%) fewer pedestrian  
28 deaths, corresponding to approximately 33 000 deaths nationally in 2005. The corresponding  
29 attributable proportion for living in richer versus poorer neighbourhoods would be 265/825 (32%)  
30 or approximately 22 000 deaths nationally. Within the narratives we could code, there were no  
31 differences between pedestrians and non-pedestrian RTI deaths in timing of death, place of  
32 death, reported injuries, or reported routine use of alcohol or smoking (data not shown).  
33  
34  
35  
36  
37  
38  
39  
40  
41  
42  
43  
44  
45  
46  
47  
48  
49  
50  
51  
52  
53  
54

|                                          | Pedestrian /<br>Non-Pedestrian<br>Total=825/1280 | Adjusted OR <sup>^</sup><br>(99% CI) | Attributable<br>Pedestrian Deaths<br>(% of all 825<br>pedestrian deaths) |
|------------------------------------------|--------------------------------------------------|--------------------------------------|--------------------------------------------------------------------------|
| <b>Education*</b>                        |                                                  |                                      |                                                                          |
| Secondary or higher                      | 112/382                                          | ref                                  |                                                                          |
| Primary or middle                        | 248/450                                          | 1.8 (1.3-2.6)                        | 110 ] 406 (49%)                                                          |
| Below primary                            | 451/423                                          | 2.9 (2.0-4.2)                        | 296 ]                                                                    |
| Unknown                                  | 14/25                                            | 1.6 (0.6-4.2)                        | N/A                                                                      |
| <b>Neighbourhood Asset</b>               |                                                  |                                      |                                                                          |
| High                                     | 137/320                                          | ref                                  |                                                                          |
| Low                                      | 643/895                                          | 1.7 (1.1-2.5)                        | 265 (32%)                                                                |
| Unknown                                  | 45/65                                            | 1.5 (0.8-2.8)                        | N/A                                                                      |
| <b>Age in years</b>                      |                                                  |                                      |                                                                          |
| 15-59 (driving ages)                     | 497/1046                                         | ref                                  |                                                                          |
| <15 (children)                           | 144/74                                           | 2.9 (1.8-4.5)                        | 94 ] 170 (21%)                                                           |
| >59 (elderly adults)                     | 184/160                                          | 1.7 (1.2-2.4)                        | 76 ]                                                                     |
| <b>Sex</b>                               |                                                  |                                      |                                                                          |
| Male                                     | 621/1121                                         | ref                                  |                                                                          |
| Female                                   | 204/159                                          | 1.5 (1.1-2.2)                        | 68 (8%)                                                                  |
| <b>Location</b>                          |                                                  |                                      |                                                                          |
| Rural                                    | 643/962                                          | ref                                  |                                                                          |
| Urban                                    | 182/318                                          | 1.5 (1.1-2.2)                        | 61 (7%)                                                                  |
| <b>Occupation</b>                        |                                                  |                                      |                                                                          |
| Salaried / Wage Earner / Professional    | 229/517                                          | ref                                  |                                                                          |
| Cultivator / Agricultural labour / Other | 162/300                                          | 0.9 (0.6-1.3)                        | N/A                                                                      |
| Non-worker / Children <15 years          | 433/463                                          | 1.2 (0.9-1.6)                        | N/A                                                                      |
| Unknown                                  | 1/0                                              | N/A                                  | N/A                                                                      |
| <b>Routine Alcohol Use**</b>             |                                                  |                                      |                                                                          |
| No                                       | 494/877                                          | ref                                  |                                                                          |
| Yes                                      | 145/260                                          | 1.1 (0.7-1.5)                        | N/A                                                                      |
| Unknown                                  | 42/69                                            | 1.0 (0.5-1.9)                        | N/A                                                                      |

**Table 2: Characteristics of pedestrian RTI deaths and attributable proportions.** \*Education of deceased adults or, in cases of deceased children <15 years, education of respondent. \*\*Excludes 218 children. ^Odds ratios are adjusted for all other variables in this table except for alcohol use; the odds ratios for alcohol use are adjusted for all other variables in this table.

## DISCUSSION

RTI is an important cause of death in India, causing 183 600 deaths in 2005, or about 2% of all deaths.<sup>[22]</sup> Much of the deceased were men between ages 15-59 years. Males had a four-fold higher cumulative risk of RTI death compared to females before the age of 70. Among the major

1  
2  
3  
4  
5  
6  
7  
8  
9 states, there was approximately 3-fold variation in the age-standardized RTI death rate and  
10 cumulative risk for males.  
11

12  
13  
14 Our estimated number of RTI deaths is more than 50% greater than the 118 265 deaths  
15 reported in the official police statistics of the National Crime Records Bureau (NCRB) in  
16 2005.[27] Compared to our estimates, the extent of under-reporting of the crude death rate in  
17 major states by NCRB ranged from <1% to about 80% (supplementary table 3). Existing  
18 regional population-based injury surveys in India support our findings and also report higher  
19 crude RTI death rates than NCRB statistics.[8,11]Under-reporting of RTI deaths in police  
20 statistics has been reported in India and other LMIC.[28-30]A study in urban India comparing  
21 both hospital- and community-based RTI data to police records identified factors contributing to  
22 under-reporting that included the deceased believed to be at fault, collision resulting from hit-  
23 and-runs, limited police resources, and the lack of a standard police reporting protocol by  
24 hospitals.[28] The factors contributing to police under-reporting, especially in rural India, require  
25 further examination. Our estimated number of RTI deaths in 2005 was consistent with the WHO  
26 estimate for 2004.[14] However, we observed a slightly higher male proportion (83% MDS vs.  
27 77% WHO, all ages) and a higher proportion of male deaths between 15-59 years (65% MDS  
28 vs. 61% WHO).  
29  
30  
31  
32  
33  
34  
35  
36  
37  
38  
39  
40

41 Almost three-quarters of all RTI deaths in India were of pedestrians and other vulnerable road  
42 users. In contrast, a much lower proportion (27%) was reported by the NCRB (figure 2).This  
43 difference equated to 59 000 pedestrian and 32 000 other vulnerable road user deaths that were  
44 not included in the 2005 NCRB records. Existing RTI studies based on regional surveys and  
45 hospital series also reported a high proportion (>60%) of vulnerable road user deaths similar to  
46 our findings.[11,12,30-32]Since the majority of vulnerable road users were pedestrians, our  
47 findings suggested that RTI deaths in individuals who were less educated, poor, female or live in  
48  
49  
50  
51  
52  
53  
54



1  
2  
3  
4  
5  
6  
7  
8  
9 urban areas may have been disproportionately excluded from the NCRB records. While poverty  
10 and education are not likely to be in the direct causal pathway of pedestrian deaths, they  
11 nonetheless point to other associated risk factors. Indeed, 55 000 pedestrian deaths in 2005  
12 (81%) was associated with lower education or living in poorer neighbourhoods compared to non-  
13 pedestrian RTI deaths. While the less educated and the poor likely travelled more often by foot,  
14 they might also be exposed to undetermined environmental (neighbourhoods with unsafe  
15 roads), biological (poor vision or decreased mobility due to poor health), and behavioral (alcohol  
16 or other substance use) risk factors for pedestrian death.[12, 33, 34]Further studies are needed  
17 to better understand pedestrian deaths in LMIC.  
18  
19  
20  
21  
22  
23  
24

25  
26 Over half of RTI deaths occurred instantly at the scene of collision and/or had head injury  
27 reported. ~~Thus~~These findings, together with existing RTI hospital series and regional surveys in  
28 India, make a strong argument that investments in primary and secondary prevention could  
29 potentially avert the greatest proportion of RTI deaths. To address the high proportion of instant  
30 deaths and head injuries among RTI deaths in India, specific interventions that are effective and  
31 based on studies in LMIC should be emphasized; these may include speed bumps, motorcycle  
32 helmets, and increasing fines and license suspensions for rule infractions.[33]In contrast,  
33 improving pre-hospital transport and hospital trauma care, could only potentially affect the  
34 38%who died on scene with delayed hospital transport (3%), en route to hospital (7%), or in  
35 hospital (28%).  
36  
37  
38  
39  
40  
41  
42  
43  
44

45 Our study is the first nationally representative survey of the causes of death in India. The simple  
46 descriptive statistics provide clear evidence on the large and avertable burden from RTI,  
47 particularly among productive age adults and pedestrians. To the best of our knowledge, only  
48 one recent study in Vietnam has used similar methods to analyze RTI deaths and policy  
49 implications on a national scale.[35]  
50  
51  
52  
53  
54

1  
2  
3  
4  
5  
6  
7  
8  
9  
10  
11 Our study faced certain limitations. First, we might have misclassified certain causes of death  
12 including suicide as RTI deaths. However, the extent of misclassification should be minimal  
13 since the RHIME verbal autopsy method was shown to be robust in discerning between types of  
14 injury deaths[36]and since the immediate two-physician agreement was high for RTI  
15 deaths(89.5%, table 1). Furthermore, suicides cause about 200 000 deaths in India annually but  
16 few are due to RTI.[19] Second, since the modes of transportation, place and timing of death,  
17 and injuries sustained were extracted from layperson open-ended narratives, the data accuracy  
18 may be in question. For example with the deceased mode of transportation, the extent of  
19 misclassification (by our study) or misreporting (by NCRB) that contributed to the differences  
20 between the two sources is uncertain. With reported injuries, our findings from these narratives  
21 most likely undercounted less visible injuries (chest, abdomen, and spine) compared to highly  
22 visible injuries such as bleeding and deformity for head and extremity injuries. Nevertheless, our  
23 findings are consistent with available Indian regional surveys and hospital series on the mode of  
24 transportation[11,12,30-32,37][41,42,30-32] place and timing of death,[1,37-41][4,37-39] and  
25 injuries sustained.[12,37,42,43][42,40,44]Third, since the narrative was not designed specifically  
26 to capture RTI death characteristics, over 25% of deaths had missing data for mode of  
27 transportation, place of death, timing of death, or reported injuries(supplementary table 1).Thus,  
28 our findings for these elements extracted from the narratives may be less representative of the  
29 decedents who lived in rural or poor areas. Finally, reliable forward projection of the number of  
30 RTI deaths beyond 2005 was not possible since the increase in the NCRB reported number of  
31 RTI deaths of140% from 2005 to 2011 appeared to outpace the rate of population growth.[44]  
32  
33 As the proportion of vulnerable road user deaths remained stable during this period in the NCRB  
34 reports, we postulated that this increase represented an actual increase in RTI death totals  
35 rather than more accurate reporting. Furthermore, given the rapid economic expansion and  
36 concurrent changes in motorization including the types of vehicle sharing the road and road  
37  
38  
39  
40  
41  
42  
43  
44  
45  
46  
47  
48  
49  
50  
51  
52  
53  
54

1  
2  
3  
4  
5  
6  
7  
8  
9 infrastructure,<sup>[45,46]</sup>our results on deceased mode of transportation, place and timing of death,  
10 and injuries sustained may not reflect the current Indian scenario. An analysis of the trend from  
11 2001-2014 is planned pending ongoing data collection in the MDS.  
12  
13

14  
15 In India, RTI is a significant cause of preventable death, particularly in males of productive  
16 working age and among pedestrians, bicyclists, and motorcyclist. We have shown that properly  
17 designed simple verbal autopsy narratives can document the much needed surveillance data on  
18 the numbers, rates, risks, and basic RTI mechanism such as modes of transportation, timing of  
19 death, place of death, and injuries sustained. Our findings suggested that investment in primary  
20 and secondary prevention could address a large proportion of avoidable RTI deaths.  
21  
22  
23  
24  
25  
26

#### 27 28 **ACKNOWLEDGEMENTS**

29 We thank the Office of the RGI for the ongoing productive collaboration on the MDS, C  
30 Ramasundarahettige for technical assistance, M Puri and S Levitt for data extraction. The  
31 opinions expressed in this article are those of the authors and do not necessarily represent  
32 those of the Government of India or the RGI.  
33  
34  
35  
36

#### 37 38 **COMPETING INTERESTS**

39 We declare that we have no competing interests.  
40  
41  
42

#### 43 44 **FUNDING**

45 This study is supported by grants from the John E Fogarty International Center of the National  
46 Institutes of Health (R01-TW05991-01 and TW07939-01), [the Bill & Melinda Gates Foundation](#)  
47 [through the Disease Control Priorities Network Project](#), and [the](#) University of Toronto (to PJ); the  
48 Canada Research Chair Programme (to PJ and ABN); and the Canadian Institutes of Health  
49 Research Doctoral Award (to MH). The funding sources had no role in the study design; data  
50  
51  
52  
53  
54

1  
2  
3  
4  
5  
6  
7  
8  
9 collection, analysis, interpretation; writing of the manuscript; or decision to submit for publication.

10 The senior author had full access to all the data in the study and had final responsibility for the  
11 decision to submit this study for publication.  
12  
13

#### 14 15 **AUTHOR'S CONTRIBUTION**

16  
17 PJ and the MDS Collaborators (appendix) designed, planned, the executed the MDS in close  
18 collaboration with the Office of the Registrar General of India (RGI). MH and PJ performed the  
19 data analysis. All authors contributed to data interpretation, revisions of the manuscript, and  
20 provided final approval. PJ is the guarantor for this report.  
21  
22  
23  
24  
25

#### 26 **DATA SHARING STATEMENT**

27  
28 Data used in this study ~~is-are~~ the property of the Registrar General of India [and the overall](#)  
29 [mortality results have been published in 2009.\[47\]](#) This specific analyses is produced under an  
30 [agreement with CGHR. Application for data access can be made to the Office of the Registrar](#)  
31 [General of India.](#)  
32  
33  
34  
35  
36  
37  
38  
39  
40  
41  
42  
43  
44  
45  
46  
47  
48  
49  
50  
51  
52  
53  
54

## REFERENCES

- 1 [Peden M, Scurfield R, Sleet D, et al. World report on road traffic injury prevention: World Health Organization 2004;1–244.](#)
- 2 [Chisholm D, Naci H, Hyder AA, et al. Cost effectiveness of strategies to combat road traffic injuries in sub-Saharan Africa and South East Asia: mathematical modelling study. \*BMJ\* 2012;\*\*344\*\*:e612.](#)
- 3 [The PLoS Medicine Editors. Preventing Road Deaths—Time for Data. \*PLoS Med\* 2010;\*\*7\*\*:e1000257.](#)
- 4 [Barffour M, Gupta S, Gururaj G, et al. Evidence-based road safety practice in India: assessment of the adequacy of publicly available data in meeting requirements for comprehensive road safety data systems. \*Traffic Inj Prev\* 2012;\*\*13 Suppl 1\*\*:17–23.](#)
- 5 [Kopits E, Cropper ML. \*Traffic fatalities and economic growth\*. World Bank Development Research Group Environment and Infrastructure, 2003.](#)
- 6 [Sathiyasekaran BW. Population-based cohort study of injuries. \*Injury\* 1996;\*\*27\*\*:695–8.](#)
- 7 [Varghese M, Mohan D. Transportation injuries in rural Haryana, North India. \*In: Proceedings of the international conference on traffic safety\* 2003;326–9.](#)
- 8 [WHO. Injury Prevention and Control: An epidemiological study of injuries in the area of Municipal Corporation of Delhi. \*Regional Office for South-East Asia\* 2003;1–18.](#)
- 9 [Gururaj G, Suryanarayana SP. Burden and impact of injuries: Results of population-based survey. \*Proceedings of the 7th world conference on injury prevention\* 2004;275–6.](#)
- 10 [Dandona R. Patterns of road traffic injuries in a vulnerable population in Hyderabad, India.](#)

Formatted: French (France)

[Injury Prevention 2006;12:183–8.](#)

11 [Dandona R, Kumar GA, Ameer MA, et al. Incidence and burden of road traffic injuries in urban India. \*Inj Prev\* 2008;14:354–9.](#)

12 [Gururaj G. Road traffic deaths, injuries and disabilities in India: current scenario. \*Natl Med J India\* 2008;21:14–20.](#)

13 [Garg N, Hyder A. Road traffic injuries in India: A review of the literature. \*Scand J of Public Health\* 2006;34:100–9.](#)

14 [World Health Organization. \*The Global Burden of Disease: 2004 Update\*. World Health Organization 2008.](#)

15 [Mathers CD, Bernard C, Moesgaard Iburg K, et al. Global Burden of Disease in 2002: data sources, methods, and results. Global Programme on Evidence for Health Policy Discussion Paper No. 54. World Health Organization 2003.](#)

16 [Jha P, Gajalakshmi V, Gupta PC, et al. Prospective Study of One Million Deaths in India: Rationale, Design, and Validation Results. \*PLoS Med\* 2006;3:e18.](#)

17 [Million Death Study Collaborators. Causes of neonatal and child mortality in India: a nationally representative mortality survey. \*Lancet\* 2010;376:1853–60.](#)

18 [Dikshit R, Gupta PC, Ramasundarahettige C, et al. Cancer mortality in India: a nationally representative survey. \*Lancet\* 2012;379:1807–16.](#)

19 [Patel V, Ramasundarahettige C, Vijayakumar L, et al. Suicide mortality in India: a nationally representative survey. \*Lancet\* 2012;379:2343–51.](#)

20 [Sinha DN, Dikshit R, Kumar R, et al. Prospective Study of Million Deaths in India: Technical](#)

1  
2  
3  
4  
5  
6  
7  
8  
9  
10  
11  
12  
13  
14  
15  
16  
17  
18  
19  
20  
21  
22  
23  
24  
25  
26  
27  
28  
29  
30  
31  
32  
33  
34  
35  
36  
37  
38  
39  
40  
41  
42  
43  
44  
45  
46  
47  
48  
49  
50  
51  
52  
53  
54  
55  
56  
57  
58  
59  
60

[document no VIII: Health care professional's manual for assigning causes of death based on RHIME household reports. RGI-CGHR, University of Toronto. 2011.http://www.cghr.org/mds \(accessed 1 Aug2012\).](#)

21 [WHO. \*International Statistical Classification of Diseases and Related Health Problems, ICD-10: Three Volume Set\*. World Health Organization 2010.](#)

22 [United Nations Populations Division. \*World population prospects \(2008 revision\). 2009.http://www.un.org/esa/population/publications/wpp2008/ \(accessed 2 July 2011\).\*](#)

23 [Mari Bhat PN. \*Completeness of India's sample registration system: an assessment using the general growth balance method. Popul Stud 2002;56:119–34.\*](#)

24 [Sivanandan V. \*An assessment of the completeness of death registration in India over the periods 1975-1978 and 1996-1999 under the generalized population model: an analysis based on SRS data\*. Mumbai: International Institute for Population Sciences2004.](#)

Formatted: French (France)

25 [Jha P, Kumar R, Khera A, et al. \*HIV mortality and infection in India: estimates from nationally representative mortality survey of 1.1 million homes. BMJ 2010;340:c621.\*](#)

Formatted: French (France)

26 [Dhingra N, Jha P, Sharma VP, et al. \*Adult and child malaria mortality in India: a nationally representative mortality survey. Lancet 2010;376:1768–74.\*](#)

27 [National Crime Records Bureau. \*Accidental Deaths and Suicides in India, 2005\*. Ministry of Home Affairs, Government of India2005.](#)

28 [Dandona R, Kumar GA, Ameer MA, et al. \*Under-reporting of road traffic injuries to the police: results from two data sources in urban India. Inj Prev 2008;14:360–5.\*](#)

Formatted: French (France)

29 [Alcorn T. \*Uncertainty clouds China's road-traffic fatality data. Lancet 2011;378:305–6.\*](#)

- 1  
2  
3  
4  
5  
6  
7  
8  
9 [30 Naci H, Chisholm D, Baker TD. Distribution of road traffic deaths by road user group: a global comparison. \*Inj Prev\* 2009;\*\*15\*\*:55–9.](#)
- 10  
11  
12  
13 [31 Mohan D. \*The road ahead: Traffic injuries and fatalities in India\*. Transportation research and injury prevention programme, Indian Institute of Technology, Delhi2004.](#)
- 14  
15  
16  
17  
18 [32 Mohan D. Traffic safety and health in Indian cities. \*Journal of Transport and Infrastructure\* 2002;\*\*9\*\*:79–94.](#)
- 19  
20  
21  
22 [33 Norton R, Hyder A, Bishai D, et al. Unintentional Injuries. In: \*Disease Control Priorities in Developing Countries\*. Oxford University Press, USA2006.](#)
- 23  
24  
25  
26 [34 Grimm M, Treibich C. Determinants of road traffic crash fatalities across Indian states. \*Health Econ\* Published Online First: 30 August 2012. doi:10.1002/hec.2870](#)
- 27  
28  
29  
30 [35 Ngo AD, Rao C, Phuong Hoa N, et al. Road traffic related mortality in Vietnam: Evidence for policy from a national sample mortality surveillance system. \*BMC Public Health\* 2012;\*\*12\*\*:561.](#)
- 31  
32  
33  
34  
35  
36 [36 Hsiao M, Morris SK, Bassani DG, et al. Factors Associated with Physician Agreement on Verbal Autopsy of over 11500 Injury Deaths in India. \*PLoS ONE\* 2012;\*\*7\*\*:e30336.](#)
- 37  
38  
39  
40 [37 Singh H, Dhatarwal SK. Pattern and distribution of injuries in fatal road traffic accidents in Rohtak \(Haryana\). \*Journal of Indian Academy of Forensic Medicine\* 2004;\*\*26\*\*:20–3.](#)
- 41  
42  
43  
44  
45  
46 [38 Dandona R, Mishra A. Deaths due to road traffic crashed in Hyderabad city in India: need for strengthening surveillance. \*Natl Med J India\* 2004;\*\*17\*\*:74–9.](#)
- 47  
48  
49  
50 [39 Sahdev P, Lacqua MJ, Singh B, et al. Road traffic fatalities in Delhi: causes, injury patterns, and incidence of preventable deaths. \*Accident Analysis & Prevention\* 1994;\*\*26\*\*:377–84.](#)
- 51  
52  
53  
54  
55  
56  
57  
58  
59  
60



1  
2  
3  
4  
5  
6  
7  
8  
9  
10  
11  
12  
13  
14  
15  
16  
17  
18  
19  
20  
21  
22  
23  
24  
25  
26  
27  
28  
29  
30  
31  
32  
33  
34  
35  
36  
37  
38  
39  
40  
41  
42  
43  
44  
45  
46  
47  
48  
49  
50  
51  
52  
53  
54  
55  
56  
57  
58  
59  
60

[40](#) [Bhattacharjee J, Bora D, Sharma RS, et al. Unnatural deaths in Delhi during 1991. \*Med Sci Law\* 1996;\*\*36\*\*:194–8.](#)

[41](#) [Jain A, Menezes RG, Kanchan T, et al. Two wheeler accidents on Indian roads--a study from Mangalore, India. \*J Forensic Leg Med\* 2009;\*\*16\*\*:130–3.](#)

[42](#) [Gururaj G, Shastri KVR, Chandramouli AB, et al. \*Traumatic brain injury\*. Bangalore: National Institute of Mental Health and Neuro Sciences, 2005.](#)

[43](#) [Colohan AR, Alves WM, Gross CR, et al. Head injury mortality in two centers with different emergency medical services and intensive care. \*J Neurosurg Pediatrics\* 1989;\*\*71\*\*:202–7.](#)

[44](#) [National Crime Records Bureau. \*Accidental Deaths and Suicides in India, 2011\*. Ministry of Home Affairs, Government of India 2011.](#)

[45](#) [Transport Research Wing, Ministry of Road Transport & Highways. \*Basic Road Statistics of India\*. Government of India 2012.](#)

[46](#) [Transport Research Wing, Ministry of Road Transport & Highways. \*Road Transport Year Book \(2009-10 & 2010-11\)\*. Government of India 2012.](#)

[47](#) [Registrar General of India and Centre for Global Health Research. \*Causes of Death in India, 2001-2003: Sample Registration System\*. Government of India 2009.](#)

Formatted: French (France)

## FIGURE LEGENDS

### Figure 1: Road traffic injury deaths, age-standardized death rate, and cumulative risk (age 0-69 years) across states and regions of India, by gender.

Death rates are standardized to the 2005 United Nations estimated Indian population. Symbol size is proportional to sample size. Northeast states include Sikkim, Arunachal Pradesh, Nagaland, Manipur, Mizoram, Tripura, and Meghalaya. Total estimates include the 80 male and 19 female deaths from Pondicherry, Chandigarh, Uttarakhand, Dadra & Nagar Haveli, A&N Islands, Daman & Diu, Lakshadweep, and Goa. CHT=Chhatisgarh.

### Figure 2: Deceased mode of transportation, place of death, and timing of death.

(A) Deceased mode of transportation in present study compared to National Crime Records Bureau 2005 Report. Shaded line represents vulnerable road users (defined as road users without a rigid barrier protecting against traumatic forces, i.e. pedestrian, bicyclist, motorcyclist, and three wheelers). Percentages from present study are weighted by state and rural/urban residence. T=estimated/reported number of deaths in 2005 (in thousands). (B) Place of death and (C) timing of death based on verbal autopsy narratives. Shaded lines represent deaths that are reported as occurring at the scene of collision or occurring instantly (defined as within 5 minutes).

### Figure 3: Reported injuries from 1124 verbal autopsy narratives (49% of all 2299 RTI deaths).

Percentages refer to those in each row with given injury (columns). \*Values in bold denote two by two chi square tests with  $p < 0.05$  (excluding unknowns). Abdominal and spinal injuries were also reported but not shown due to small numbers (61 and 25 cases, respectively).

1  
2  
3  
4  
5  
6  
7  
8  
9  
10  
11  
12  
13  
14  
15  
16  
17  
18  
19  
20  
21  
22  
23  
24  
25  
26  
27  
28  
29  
30  
31  
32  
33  
34  
35  
36  
37  
38  
39  
40  
41  
42  
43  
44  
45  
46  
47  
48  
49  
50  
51  
52  
53  
54  
55  
56  
57  
58  
59  
60

**LIST OF ACRONYMS**

- CI      Confidence interval
- ICD-10      International Statistical Classification of Diseases and Related Health Problems, 10<sup>th</sup> Revision
- LMIC      Low- and middle-income countries
- MDS      Million Death Study
- NCRB      National Crime Records Bureau
- RGI      Registrar General of India
- RTI      Road traffic injury
- SRS      Sample registration system
- UN      United Nations
- WHO      World Health Organization



**Road traffic injury mortality and its mechanisms in India:  
nationally representative mortality survey of 1.1 million  
homes**

|                                                                                                                                                                                                                             |                                                                                                                                                                                                                                                                                                                                                                                                                                                                                                                                                                                                                                                              |
|-----------------------------------------------------------------------------------------------------------------------------------------------------------------------------------------------------------------------------|--------------------------------------------------------------------------------------------------------------------------------------------------------------------------------------------------------------------------------------------------------------------------------------------------------------------------------------------------------------------------------------------------------------------------------------------------------------------------------------------------------------------------------------------------------------------------------------------------------------------------------------------------------------|
| Journal:                                                                                                                                                                                                                    | <i>BMJ Open</i>                                                                                                                                                                                                                                                                                                                                                                                                                                                                                                                                                                                                                                              |
| Manuscript ID:                                                                                                                                                                                                              | bmjopen-2013-002621.R2                                                                                                                                                                                                                                                                                                                                                                                                                                                                                                                                                                                                                                       |
| Article Type:                                                                                                                                                                                                               | Research                                                                                                                                                                                                                                                                                                                                                                                                                                                                                                                                                                                                                                                     |
| Date Submitted by the Author:                                                                                                                                                                                               | 17-Jul-2013                                                                                                                                                                                                                                                                                                                                                                                                                                                                                                                                                                                                                                                  |
| Complete List of Authors:                                                                                                                                                                                                   | Hsiao, Marvin; University of Toronto, Centre for Global Health Research; University of Toronto, Department of Surgery<br>Malhotra, Ajai; VCU Medical Center, Virginia Commonwealth University, Department of Surgery<br>Thakur, JS; Post Graduate Institute of Medical Education and Research, Department of Community Medicine<br>Sheth, Jay; Smt. N.H.L. Municipal Medical College,<br>Nathens, Avery; University of Toronto, Department of Surgery;<br>Sunnybrook Health Sciences Centre, Sunnybrook Research Institute<br>Dhingra, Neeraj; National AIDS Control Organization,<br>Jha, Prabhat; University of Toronto, Centre for Global Health Research |
| <b>Primary Subject Heading</b>:                                                                                                                                                                                             | Epidemiology                                                                                                                                                                                                                                                                                                                                                                                                                                                                                                                                                                                                                                                 |
| Secondary Subject Heading:                                                                                                                                                                                                  | Global health, Public health                                                                                                                                                                                                                                                                                                                                                                                                                                                                                                                                                                                                                                 |
| Keywords:                                                                                                                                                                                                                   | road traffic injury, verbal autopsy, India, low- and middle-income countries                                                                                                                                                                                                                                                                                                                                                                                                                                                                                                                                                                                 |
| <p>Note: The following files were submitted by the author for peer review, but cannot be converted to PDF. You must view these files (e.g. movies) online.</p> <p>STROBE_checklist_BMJ-Open_cross-sectional-studies.doc</p> |                                                                                                                                                                                                                                                                                                                                                                                                                                                                                                                                                                                                                                                              |

SCHOLARONE™  
Manuscripts

## Road traffic injury mortality and its mechanisms in India: nationally representative mortality survey of 1.1 million homes

Marvin Hsiao, Ajai Malhotra, JS Thakur, Jay K Sheth, Avery B Nathens, Neeraj Dhingra, Prabhat Jha, for the Million Death Study Collaborators.

Centre for Global Health Research, Li Ka Shing Knowledge Institute, St Michael's Hospital, University of Toronto, Toronto, Canada (M Hsiao MD, Prof P Jha DPhil); Division of General Surgery, Department of Surgery, University of Toronto, Toronto, Canada (M Hsiao MD, Prof AB Nathens MD); Department of Surgery, VCU Medical Center, Virginia Commonwealth University, Richmond, USA (Prof A Malhotra MD); Department of Community Medicine, Post Graduate Institute of Medical Education and Research, Chandigarh, India (JS Thakur MD); Smt. N.H.L. Municipal Medical College, Ahmedabad, India (JK Sheth MD); Sunnybrook Research Institute, Sunnybrook Health Sciences Centre, Toronto, Canada (Prof AB Nathens MD); National AIDS Control Organization, New Delhi, India (N Dhingra MD)

Correspondence to:

Marvin Hsiao

Centre for Global Health Research, Li Ka Shing Knowledge Institute, St Michael's Hospital, and Division of General Surgery, Department of Surgery, University of Toronto  
30 Bond Street, Toronto, Ontario, Canada M5B 1W8

[marvin.my.hsiao@gmail.com](mailto:marvin.my.hsiao@gmail.com)

+1 416-864-6042 (phone) / +1 416-864-5256 (fax)

Keywords: Road traffic injury; verbal autopsy; India; low- and middle-income countries

Word count: Text: 3361

**ABSTRACT:**

**Objectives:** To quantify and describe the mechanism of road traffic injury (RTI) deaths in India.

**Design:** We conducted a nationally representative mortality survey where at least two physicians coded each non-medical field staff's verbal autopsy reports. RTI mechanism data were extracted from the narrative section of these reports.

**Setting:** 1.1 million homes in India.

**Participants:** Over 122 000 deaths at all ages from 2001-2003.

**Primary and secondary outcome measures:** Age- and sex-specific mortality rates, place and timing of death, modes of transportation, and injuries sustained.

**Results:** The 2299 RTI deaths in the survey correspond to an estimated 183 600 RTI deaths or about 2% of all deaths in 2005 nationally, of which 65% occurred in males between the ages of 15-59 years. The age-adjusted mortality rate was greater in males than in females, in urban than in rural areas, and was notably higher than that estimated from national police records. Pedestrians (68 000), motorcyclists (36 000), and other vulnerable road users (20 000) constituted 68% of RTI deaths (124 000) nationally. Among the study sample, the majority of all RTI deaths occurred at the scene of collision (1005/1733, 58%), within minutes of collision (883/1596, 55%), and/or involved a head injury (691/1124, 62%). Compared to non-pedestrian RTI deaths, about 55 000 (81%) of pedestrian deaths were associated with less education and living in poorer neighbourhoods.

**Conclusions:** In India, RTI cause a substantial number of deaths, particularly among pedestrians and other vulnerable road users. Interventions to prevent collisions and reduce injuries might address over half of the RTI deaths. Improved pre-hospital transport and hospital trauma care might address just over a third of the RTI deaths.

## ARTICLE SUMMARY

### Article focus

- To directly estimate the age- and sex-specific mortality rates and describe the place and timing of death, modes of transportation, and injuries sustained for road traffic injury (RTI) deaths in India using a nationally representative mortality survey of 1.1 million homes.

### Key messages

- Road traffic injuries cause a substantial number of avertable deaths, particularly in males of productive working age and among pedestrians and other vulnerable road users.
- Preventative interventions should be emphasized as the majority of all RTI deaths occurred at the scene of collision, within minutes of collision, and/or involved a head injury.
- Properly designed mortality survey with verbal autopsy narratives can provide much-needed data to assist RTI prevention efforts.

### Strengths and limitations of this study

- This study is the first nationally representative survey of the causes of death in India and overcomes limitations of existing data sources including regional injury surveys, hospital series, and national police reports.
- Limitations of the study include potential misclassification of deaths by physician coders, the use of layperson narratives with a potential for recall bias and inaccuracies, and limited ability to forward project study results given the rapid changes in motorization in India.

## INTRODUCTION

Road traffic injuries (RTI) area large and growing public health burden, especially in low-and middle-income countries (LMIC) where 90% of the world's deaths due to RTI are estimated to occur.[1] There are few high-quality epidemiologic data on RTI to guide the development, implementation, and surveillance of evidence-based policy and programs in LMICs.[2-4]

The number of deaths due to RTI in India is projected to rise with increasing motorization.[1,5] Aside from a few regional injury surveys,[6-11] the current data on the numbers and mechanisms of RTI deaths in India rely on police or hospital records, both of which can substantially underestimate death rates in the poor, rural, and uneducated people who still constitute large proportions of the Indian population.[2-4,12,13]

The World Health Organization (WHO), using indirect modeling methods, estimated about 202 000 RTI deaths in India in 2004.[14,15] No study has validated this estimate with direct measurement nor documented detailed RTI mechanism for India nationally. Here, we estimate the regional, age- and sex-specific mortality rate and risk of RTI death in India using data from the Million Death Study (MDS). We also report the modes of transportation, place and timing of death, and injuries sustained in RTI deaths.



## METHODS

**Study Design:** The MDS is an on-going nationally representative survey designed to determine the causes and risk factors of death in India, organized by the Registrar General of India (RGI). The design, methodology, and preliminary findings of the MDS have been described elsewhere.[16-19] In brief, the MDS used an enhanced version of verbal autopsy (known as the routine, reliable, representative, re-sampled household investigation of mortality with medical evaluation or RHIME) to monitor a nationally representative sample of 1.1 million households in the Sample Registration System (SRS). Within six months of every death occurring in these households from 2001-3, a trained, nonmedical RGI surveyor interviewed a relative or close-acquaintance of the deceased to obtain the symptoms and events around the death using structured questions and a local language narrative guided by a specific symptom list. These records were converted into electronic records and emailed to two of 140 trained physicians who, independently and anonymously, assigned an underlying cause of death (with allocation determined randomly based only on the physician's ability to read the local language), using guidelines for the major causes of death.[20] Records were assigned cause of death in three-digit International Statistical Classification of Diseases and Related Health Problems, 10th revision (ICD-10).[21] Records where coders disagreed on the cause of death underwent anonymous reconciliation. Continuing disagreements were adjudicated by a third senior physician. Five percent of households were randomly resurveyed and the results were consistent within families of ICD-10 codes.[16] Participation in the SRS is on a voluntary basis and oral consent was obtained under the confidentiality and consent procedures of the Registration of Births and Deaths Act, 1969.

**Road Traffic Injury Deaths:** The RTI deaths in this study were of people who died between 2001 and 2003 with a final assigned ICD-10 code within V01-V89. We translated the open-ended narratives into English from 14 local languages, and systematically extracted the modes

1  
2  
3 of transportation, place and timing of death, and injuries sustained from 2157 of the 2299 RTI  
4 deaths using a standardized data extraction tool and procedure (the remaining 142 deaths, 6%,  
5 had missing or illegible narratives). For these four data elements, there were substantial inter-  
6 rater agreement between two investigators and two research assistants who were trained and  
7 independently extracted data from the narratives of a random 10% of RTI deaths (lowest kappa  
8 statistic was greater than 0.69 for all pair-wise comparisons between the four data extractors;  
9 data not shown). The two research assistants then independently extracted data from all  
10 narratives. Adjudication was done by an investigator (MH) for discrepancies in extracted data.  
11  
12  
13  
14  
15  
16  
17  
18  
19  
20  
21  
22

23 **Analysis:** The age and sex-specific proportion of RTI deaths within the 2001-2003 survey was  
24 applied to the 2005 United Nations (UN) estimates of the number of deaths from all causes in  
25 India, after weighting for sampling probability for each rural or urban stratum per state (although  
26 such weighting made little difference because the study was nationally representative).[18,22]  
27 The 2005 UN death estimates were used so as to correct for the slight undercounts reported in  
28 the total death rates in the SRS [23,24] and to account for the 12% of enumerated deaths  
29 without completed field visits (mostly due to out-migration of the family or from incomplete field  
30 records). The proportion of these missed deaths was similarly dispersed across sex, age, and  
31 states. Use of 2003 or 2004 UN death totals yielded nearly identical results (data not shown).  
32 The 99% confidence intervals (99%CI) for mortality rate were calculated based on the weighted  
33 number of study deaths. State- and rural/urban-specific estimates of the number, mortality rate,  
34 and lifetime risk of RTI death were calculated by partitioning the UN national death totals  
35 according to relative SRS death rates as previously described.[18,25,26] Urban and rural status  
36 was defined according to the Census of India. Logistic regression was used to compare the  
37 socio-demographic traits of pedestrian and non-pedestrian RTI deaths. Household fuel type was  
38 used as a measure of community wealth, based on earlier principal component analyses [18]:  
39 high asset neighbourhoods had >50% of households that used gas, electricity, or kerosene; low  
40  
41  
42  
43  
44  
45  
46  
47  
48  
49  
50  
51  
52  
53  
54  
55  
56  
57  
58  
59  
60

1  
2  
3 asset or poor neighbourhoods used primarily coal, firewood, or other. Attributable proportion  
4  
5 was calculated for traits of pedestrian deaths compared to non-pedestrian RTI deaths.  
6  
7  
8

9  
10 The MDS received ethics approval from the review boards of the Post-Graduate Institute of  
11  
12 Medical Education and Research in Chandigarh, India; St Michael's Hospital in Toronto,  
13  
14 Canada; and the Indian Council of Medical Research's Health Ministry's Screening Committee.  
15  
16  
17  
18  
19

## 20 21 **RESULTS**

22  
23 The 2299 RTI deaths in the 2001-2003 survey correspond to an estimated 183 600 (99%CI 173  
24  
25 800-193 400) RTI deaths in India in 2005. The majority of these RTI deaths occurred in males  
26  
27 (152 100 deaths, 82.8%; table 1). The age-standardized RTI mortality rate for males (26.2 per  
28  
29 100 000, 24.6-27.7) was higher than for females (5.7 per 100 000, 5.0-6.4). While the RTI  
30  
31 mortality rate increased with age in both genders, the largest number of RTI deaths occurred in  
32  
33 males between 15-59 years of age (118 900, 64.8%).  
34  
35  
36  
37

38 At these death rates and in the theoretical absence of other causes of death, males in India had  
39  
40 a 2.1% (2.0-2.3) risk of dying from RTI before age 70, with the highest risks at ages 30-59  
41  
42 years; females had a 0.5% (0.4-0.5) risk of dying from RTI before age 70. Males in Haryana,  
43  
44 Punjab, Tamil Nadu, and Uttar Pradesh had significantly higher risks (3.0-4.1%) than the  
45  
46 national risk (figure 1). In contrast, males in Bihar, Jharkhand, Andhra Pradesh, Orissa, Gujarat,  
47  
48 and West Bengal had significantly lower risks (1.3-1.6%) than the national risk of RTI deaths.  
49  
50 Males living in urban areas had slightly higher age-standardized mortality rates and risks of RTI  
51  
52 deaths (27.6 per 100 000; 2.4%, 2.1-2.6) compared to males living in rural areas (24.9 per 100  
53  
54 000; 2.0%, 1.8-2.1). By contrast, female RTI mortality rates and risks before age 70 varied much  
55  
56 less across states and were similar in rural and urban areas (data not shown).  
57  
58  
59  
60

## Study deaths, 2001-2003

## All India, 2005

|                                            | Number of RTI deaths / all coded deaths | Proportion RTI* | Rural (%**) | Two coders immediately agree | All deaths / population (millions, 2005 UN estimates) | Estimated RTI deaths§, thousands | RTI death rateΨ per 100 000 (99% CI) | Period risk for RTI death† |
|--------------------------------------------|-----------------------------------------|-----------------|-------------|------------------------------|-------------------------------------------------------|----------------------------------|--------------------------------------|----------------------------|
| <b>Male - age in years</b>                 |                                         |                 |             |                              |                                                       |                                  |                                      |                            |
| 0-4                                        | 44 / 11719                              | 0.4%            | 37 (76.7)   | 44                           | 1.2 / 67                                              | 4.9                              | 7.4 (6.5-8.4)¶                       | 0.04%                      |
| 5-14                                       | 97 / 1926                               | 5.2%            | 86 (84.1)   | 87                           | 0.2 / 129                                             | 8.5                              | 6.6 (4.9-8.3)                        | 0.1%                       |
| 15-29                                      | 605 / 4727                              | 13.0%           | 462 (68.9)  | 558                          | 0.4 / 163                                             | 47.1                             | 28.9 (25.9-31.9)                     | 0.4%                       |
| 30-44                                      | 529 / 6817                              | 7.7%            | 385 (67.0)  | 477                          | 0.6 / 115                                             | 43.8                             | 37.9 (33.7-42.1)                     | 0.6%                       |
| 45-59                                      | 356 / 11731                             | 3.0%            | 249 (60.9)  | 312                          | 0.9 / 73                                              | 28.0                             | 38.4 (33.2-43.6)                     | 0.6%                       |
| 60-69                                      | 149 / 12120                             | 1.2%            | 117 (71.8)  | 133                          | 0.9 / 24                                              | 10.6                             | 44.0 (34.6-53.4)                     | 0.5%                       |
| >70                                        | 123 / 18732                             | 0.6%            | 106 (81.2)  | 98                           | 1.3 / 14                                              | 9.1                              | 64.5 (49.1-80.0)                     | --                         |
| All ages                                   | 1903 / 67772                            | 2.8%            | 1442 (68.9) | 1709                         | 5.3 / 585                                             | 152.1                            | 26.2                                 | 2.1%†                      |
| (% or 99% CI)                              |                                         |                 |             | (89.8%)                      |                                                       | (143.2-161.0)                    | (24.6-27.7)                          | (2.0-2.3)                  |
| <b>Female - age in years</b>               |                                         |                 |             |                              |                                                       |                                  |                                      |                            |
| 0-4                                        | 50 / 11492                              | 0.4%            | 46 (93.4)   | 45                           | 1.2 / 61                                              | 5.0                              | 8.1 (7.1-9.1)¶                       | 0.04%                      |
| 5-14                                       | 44 / 1955                               | 2.3%            | 38 (80.1)   | 43                           | 0.2 / 118                                             | 3.8                              | 3.2 (2.0-4.4)                        | 0.03%                      |
| 15-29                                      | 72 / 4394                               | 1.5%            | 53 (60.5)   | 63                           | 0.3 / 150                                             | 5.3                              | 3.5 (2.4-4.6)                        | 0.1%                       |
| 30-44                                      | 59 / 4055                               | 1.4%            | 39 (59.0)   | 50                           | 0.3 / 106                                             | 4.4                              | 4.1 (2.7-5.5)                        | 0.1%                       |
| 45-59                                      | 70 / 6402                               | 1.1%            | 55 (70.9)   | 61                           | 0.5 / 69                                              | 6.0                              | 8.6 (5.9-11.3)                       | 0.1%                       |
| 60-69                                      | 54 / 9016                               | 0.6%            | 42 (68.6)   | 52                           | 0.6 / 25                                              | 3.7                              | 14.8 (9.8-19.9)                      | 0.2%                       |
| >70                                        | 47 / 17343                              | 0.3%            | 33 (61.8)   | 35                           | 1.3 / 16                                              | 3.5                              | 21.6 (13.4-29.9)                     | --                         |
| All ages                                   | 396 / 54657                             | 0.7%            | 306 (69.8)  | 349                          | 4.5 / 546                                             | 31.5                             | 5.7                                  | 0.5%†                      |
| (% or 99% CI)                              |                                         |                 |             | (88.1%)                      |                                                       | (27.5-35.6)                      | (5.0-6.4)                            | (0.4-0.5)                  |
| <b>Total male and female, &lt;70 years</b> | 2129 / 86354                            | 2.4%            | 1609 (68.5) | 1925                         | 7.2 / 1100                                            | 171.0                            | 15.5                                 | 1.3%†                      |
| (% or 99% CI)                              |                                         |                 |             | (90.4%)                      |                                                       | (161.5-180.4)                    | (14.7-16.4)                          | (1.3-1.4)                  |
| <b>Total male and female, all ages</b>     | 2299 / 122429                           | 1.8%            | 1748 (69.0) | 2058                         | 9.8 / 1131                                            | 183.6                            | 16.2                                 | 1.3%†                      |
| (% or 99% CI)                              |                                         |                 |             | (89.5%)                      |                                                       | (173.8-193.4)                    | (15.4-17.1)                          | (1.3-1.4)                  |

**Table 1: Road traffic injury deaths in the present study and estimated national totals for 2005, by age and gender.** \*Proportion of RTI deaths compared to all deaths, weighted by state and residence (rural/urban). \*\*Percentage rural is weighted by state and residence (rural/urban). §Obtained by multiplying the United Nations estimated total deaths in 2005 by the weighted proportions. ΨAge standardized to the 2005 United Nations estimated Indian population; 99% CI shown are calculated based on weighted number of study deaths, which result in wider CI than those based on physician agreement. †Annual RTI death rate multiplied by the duration of age range, except for the lifetime risk which is calculated between 0-69 years by summation of the age specific period risks. ¶Crude death rate.

1  
2  
3 The deceased mode of transportation was described in the narratives of 2105 (92%) of the RTI  
4 deaths. National estimates for the deceased mode of transportation were calculated, as those  
5 with unknown and known modes of transportation did not appear to differ with respect to the  
6 major socio-demographic traits (Supplementary Table 1). Vulnerable road users are those  
7 without a rigid barrier protecting against traumatic forces and include pedestrians, motorcyclists,  
8 bicyclists, and three-wheelers. They constituted a majority (68%; n=124 000, 99%CI 115 000-  
9 131 000) of RTI deaths, led by pedestrians (37%; n=68 000, 62 000-73 000) and motorcyclists  
10 (20%; n=36 000, 31 000-40 000) (figure 2). Drivers and passengers of motorized four-wheelers  
11 comprised 16% (n=31 000, 27 000-35 000) of RTI deaths. By contrast, the 2005 police reports,  
12 which use a different but compatible classification system to ICD-10, recorded only 33000  
13 vulnerable road user deaths and only 9000 pedestrian deaths.[27] The most common types of  
14 vehicle to collide into the decedents were heavy transport vehicles and buses (37%; n=68 000,  
15 61 000-74 000), followed by cars and vans (15%; n=28 000, 24 000-32 000). Single-vehicle  
16 incidents comprised 9% of deaths (n=17 000, 14 000-20 000). The most frequent combinations,  
17 resulting in 23% (n=42 000, 37 000-47 000) of RTI deaths, were collisions of heavy transport  
18 vehicles or buses with pedestrians and motorcyclists (data not shown).  
19  
20  
21  
22  
23  
24  
25  
26  
27  
28  
29  
30  
31  
32  
33  
34  
35  
36  
37  
38  
39

40 The place and timing of death were described in the narratives of 1733 (75%) and 1596 (69%)  
41 of the RTI deaths respectively (figure 2; see supplementary table 1 for a summary of missing  
42 data from the narratives with respect to deceased characteristics). For these narratives, only the  
43 study proportion and not national estimates were made. Most RTI deaths occurred at the scene  
44 of collision (58%, 1005/1733) or instantly, defined as within 5 minutes (55%, 883/1596). Only 3%  
45 (45/1733) were labeled as potentially avertable with better pre-hospital transport as they  
46 occurred on scene but not instantly. Another 35% of deaths occurred en route (7%, 124/1733) or  
47 in hospital (28%, 481/1733).  
48  
49  
50  
51  
52  
53  
54  
55  
56  
57  
58  
59  
60

1  
2  
3 Injuries sustained by the deceased were reported from 1124 narratives (49%). Head injuries  
4  
5 were the most commonly reported (62%, 691/1124), of which 76% (524/691) were reported as  
6  
7 isolated head injuries (figure 3). A greater percentage of motorcyclists (78%, 188/241) had head  
8  
9 injuries reported compared to non-motorcyclists (57%, 457/807). After adjusting for age, sex,  
10  
11 rural/urban, neighbourhood asset, and education, bicyclists and motorcyclists were more likely  
12  
13 to have head injuries reported compared to non-vulnerable road users (adjusted OR 1.7, 1.2-  
14  
15 2.5) (supplementary table 2).  
16  
17  
18  
19

20  
21 Compared to non-pedestrian RTI deaths, pedestrian deaths occurred to those who had less  
22  
23 education (or in the case of children age <15 years, have less educated parents) (adjusted OR  
24  
25 2.9, 99%CI 2.0-4.2), lived in poorer neighbourhoods (1.7, 1.1-2.5), were children or elderly  
26  
27 adults (<15 years: 2.9, 1.8-4.5; >59 years: 1.7, 1.2-2.4), were female (1.5, 1.2-2.2), and lived in  
28  
29 urban areas (1.5, 1.1-2.2) (table 2). If pedestrian deaths had the same proportion of secondary  
30  
31 or higher education as non-pedestrian RTI deaths, there would be 406/825 (49%) fewer  
32  
33 pedestrian deaths, corresponding to approximately 33 000 deaths nationally in 2005. The  
34  
35 corresponding attributable proportion for living in richer versus poorer neighbourhoods would be  
36  
37 265/825 (32%) or approximately 22 000 deaths nationally. Within the narratives we could code,  
38  
39 there were no differences between pedestrians and non-pedestrian RTI deaths in timing of  
40  
41 death, place of death, reported injuries, or reported routine use of alcohol or smoking (data not  
42  
43 shown).  
44  
45  
46  
47  
48  
49  
50  
51  
52  
53  
54  
55  
56  
57  
58  
59  
60

|                                          | Pedestrian /<br>Non-Pedestrian<br>Total=825/1280 | Adjusted OR <sup>^</sup><br>(99% CI) | Attributable<br>Pedestrian Deaths<br>(% of all 825<br>pedestrian deaths) |
|------------------------------------------|--------------------------------------------------|--------------------------------------|--------------------------------------------------------------------------|
| <b>Education*</b>                        |                                                  |                                      |                                                                          |
| Secondary or higher                      | 112/382                                          | ref                                  |                                                                          |
| Primary or middle                        | 248/450                                          | 1.8 (1.3-2.6)                        | 110 ] 406 (49%)                                                          |
| Below primary                            | 451/423                                          | 2.9 (2.0-4.2)                        |                                                                          |
| Unknown                                  | 14/25                                            | 1.6 (0.6-4.2)                        | N/A                                                                      |
| <b>Neighbourhood Asset</b>               |                                                  |                                      |                                                                          |
| High                                     | 137/320                                          | ref                                  |                                                                          |
| Low                                      | 643/895                                          | 1.7 (1.1-2.5)                        | 265 (32%)                                                                |
| Unknown                                  | 45/65                                            | 1.5 (0.8-2.8)                        | N/A                                                                      |
| <b>Age in years</b>                      |                                                  |                                      |                                                                          |
| 15-59 (driving ages)                     | 497/1046                                         | ref                                  |                                                                          |
| <15 (children)                           | 144/74                                           | 2.9 (1.8-4.5)                        | 94 ] 170 (21%)                                                           |
| >59 (elderly adults)                     | 184/160                                          | 1.7 (1.2-2.4)                        |                                                                          |
| <b>Sex</b>                               |                                                  |                                      |                                                                          |
| Male                                     | 621/1121                                         | ref                                  |                                                                          |
| Female                                   | 204/159                                          | 1.5 (1.1-2.2)                        | 68 (8%)                                                                  |
| <b>Location</b>                          |                                                  |                                      |                                                                          |
| Rural                                    | 643/962                                          | ref                                  |                                                                          |
| Urban                                    | 182/318                                          | 1.5 (1.1-2.2)                        | 61 (7%)                                                                  |
| <b>Occupation</b>                        |                                                  |                                      |                                                                          |
| Salaried / Wage Earner / Professional    | 229/517                                          | ref                                  |                                                                          |
| Cultivator / Agricultural labour / Other | 162/300                                          | 0.9 (0.6-1.3)                        | N/A                                                                      |
| Non-worker / Children <15 years          | 433/463                                          | 1.2 (0.9-1.6)                        | N/A                                                                      |
| Unknown                                  | 1/0                                              | N/A                                  | N/A                                                                      |
| <b>Routine Alcohol Use**</b>             |                                                  |                                      |                                                                          |
| No                                       | 494/877                                          | ref                                  |                                                                          |
| Yes                                      | 145/260                                          | 1.1 (0.7-1.5)                        | N/A                                                                      |
| Unknown                                  | 42/69                                            | 1.0 (0.5-1.9)                        | N/A                                                                      |

**Table 2: Characteristics of pedestrian RTI deaths and attributable proportions.** \*Education of deceased adults or, in cases of deceased children <15 years, education of respondent. \*\*Excludes 218 children. ^Odds ratios are adjusted for all other variables in this table except for alcohol use; the odds ratios for alcohol use are adjusted for all other variables in this table.

## DISCUSSION

RTI is an important cause of death in India, causing 183 600 deaths in 2005, or about 2% of all deaths.[22] Much of the deceased were men between ages 15-59 years. Males had a four-fold



1  
2  
3 higher cumulative risk of RTI death compared to females before the age of 70. Among the major  
4  
5 states, there was approximately 3-fold variation in the age-standardized RTI death rate and  
6  
7 cumulative risk for males.  
8  
9

10  
11 Our estimated number of RTI deaths is more than 50% greater than the 118 265 deaths  
12  
13 reported in the official police statistics of the National Crime Records Bureau (NCRB) in  
14  
15 2005.[27] Compared to our estimates, the extent of under-reporting of the crude death rate in  
16  
17 major states by NCRB ranged from <1% to about 80% (supplementary table 3). Existing  
18  
19 regional population-based injury surveys in India support our findings and also report higher  
20  
21 crude RTI death rates than NCRB statistics.[8, 11] Under-reporting of RTI deaths in police  
22  
23 statistics has been reported in India and other LMIC.[28-30] A study in urban India comparing  
24  
25 both hospital- and community-based RTI data to police records identified factors contributing to  
26  
27 under-reporting that included the deceased believed to be at fault, collision resulting from hit-  
28  
29 and-runs, limited police resources, and the lack of a standard police reporting protocol by  
30  
31 hospitals.[28] The factors contributing to police under-reporting, especially in rural India, require  
32  
33 further examination. Our estimated number of RTI deaths in 2005 was consistent with the WHO  
34  
35 estimate for 2004.[14] However, we observed a slightly higher male proportion (83% MDS vs.  
36  
37 77% WHO, all ages) and a higher proportion of male deaths between 15-59 years (65% MDS  
38  
39 vs. 61% WHO).  
40  
41  
42  
43  
44  
45

46  
47 Almost three-quarters of all RTI deaths in India were of pedestrians and other vulnerable road  
48  
49 users. In contrast, a much lower proportion (27%) was reported by the NCRB (figure 2). This  
50  
51 difference equated to 59 000 pedestrian and 32 000 other vulnerable road user deaths that were  
52  
53 not included in the 2005 NCRB records. Existing RTI studies based on regional surveys and  
54  
55 hospital series also reported a high proportion (>60%) of vulnerable road user deaths similar to  
56  
57 our findings.[11, 12, 30-32] Since the majority of vulnerable road users were pedestrians, our  
58  
59  
60



1  
2  
3 findings suggested that RTI deaths in individuals who were less educated, poor, female or live in  
4 urban areas may have been disproportionately excluded from the NCRB records. While poverty  
5 and education are not likely to be in the direct causal pathway of pedestrian deaths, they  
6 nonetheless point to other associated risk factors. Indeed, 55 000 pedestrian deaths in 2005  
7 (81%) was associated with lower education or living in poorer neighbourhoods compared to non-  
8 pedestrian RTI deaths. While the less educated and the poor likely travelled more often by foot,  
9 they might also be exposed to undetermined environmental (neighbourhoods with unsafe  
10 roads), biological (poor vision or decreased mobility due to poor health), and behavioral (alcohol  
11 or other substance use) risk factors for pedestrian death.[12, 33, 34] Further studies are needed  
12 to better understand pedestrian deaths in LMIC.  
13  
14  
15  
16  
17  
18  
19  
20  
21  
22  
23  
24

25  
26  
27 Over half of RTI deaths occurred instantly at the scene of collision and/or had head injury  
28 reported. These findings, together with existing RTI hospital series and regional surveys in India,  
29 make a strong argument that investments in primary and secondary prevention could potentially  
30 avert the greatest proportion of RTI deaths. To address the high proportion of instant deaths and  
31 head injuries among RTI deaths in India, specific interventions that are effective and based on  
32 studies in LMIC should be emphasized; these may include speed bumps, motorcycle helmets,  
33 and increasing fines and license suspensions for rule infractions.[33] In contrast, improving pre-  
34 hospital transport and hospital trauma care, could only potentially affect the 38% who died on  
35 scene with delayed hospital transport (3%), en route to hospital (7%), or in hospital (28%).  
36  
37  
38  
39  
40  
41  
42  
43  
44  
45  
46  
47

48  
49 Our study is the first nationally representative survey of the causes of death in India. The simple  
50 descriptive statistics provide clear evidence on the large and avertable burden from RTI,  
51 particularly among productive age adults and pedestrians. To the best of our knowledge, only  
52 one recent study in Vietnam has used similar methods to analyze RTI deaths and policy  
53 implications on a national scale.[35]  
54  
55  
56  
57  
58  
59  
60

1  
2  
3  
4  
5 Our study faced certain limitations. First, we might have misclassified certain causes of death  
6 including suicide as RTI deaths. However, the extent of misclassification should be minimal  
7 since the RHIME verbal autopsy method was shown to be robust in discerning between types of  
8 injury deaths[36] and since the immediate two-physician agreement was high for RTI  
9 deaths(89.5%, table 1). Furthermore, suicides cause about 200 000 deaths in India annually but  
10 few are due to RTI.[19] Second, since the modes of transportation, place and timing of death,  
11 and injuries sustained were extracted from layperson open-ended narratives, the data accuracy  
12 may be in question. For example with the deceased mode of transportation, the extent of  
13 misclassification (by our study) or misreporting (by NCRB) that contributed to the differences  
14 between the two sources is uncertain. With reported injuries, our findings from these narratives  
15 most likely undercounted less visible injuries (chest, abdomen, and spine) compared to highly  
16 visible injuries such as bleeding and deformity for head and extremity injuries. Nevertheless, our  
17 findings are consistent with available Indian regional surveys and hospital series on the mode of  
18 transportation[11,12,30-32,37] place and timing of death,[1,37-41] and injuries  
19 sustained.[12,37,42,43] Third, since the narrative was not designed specifically to capture RTI  
20 death characteristics, over 25% of deaths had missing data for mode of transportation, place of  
21 death, timing of death, or reported injuries (supplementary table 1). Thus, our findings for these  
22 elements extracted from the narratives may be less representative of the decedents who lived in  
23 rural or poor areas. Finally, reliable forward projection of the number of RTI deaths beyond 2005  
24 was not possible since the increase in the NCRB reported number of RTI deaths of 140% from  
25 2005 to 2011 appeared to outpace the rate of population growth.[44] As the proportion of  
26 vulnerable road user deaths remained stable during this period in the NCRB reports, we  
27 postulated that this increase represented an actual increase in RTI death totals rather than more  
28 accurate reporting. Furthermore, given the rapid economic expansion and concurrent changes  
29 in motorization including the types of vehicle sharing the road and road infrastructure,[45,46] our  
30  
31  
32  
33  
34  
35  
36  
37  
38  
39  
40  
41  
42  
43  
44  
45  
46  
47  
48  
49  
50  
51  
52  
53  
54  
55  
56  
57  
58  
59  
60

1  
2  
3 results on deceased mode of transportation, place and timing of death, and injuries sustained  
4  
5 may not reflect the current Indian scenario. An analysis of the trend from 2001-2014 is planned  
6  
7 pending ongoing data collection in the MDS.  
8  
9

10  
11 In India, RTI is a significant cause of preventable death, particularly in males of productive  
12  
13 working age and among pedestrians, bicyclists, and motorcyclist. We have shown that properly  
14  
15 designed simple verbal autopsy narratives can document the much needed surveillance data on  
16  
17 the numbers, rates, risks, and basic RTI mechanism such as modes of transportation, timing of  
18  
19 death, place of death, and injuries sustained. Our findings suggested that investment in primary  
20  
21 and secondary prevention could address a large proportion of avoidable RTI deaths.  
22  
23  
24  
25

## 26 27 **ACKNOWLEDGEMENTS**

28  
29 We thank the Office of the RGI for the ongoing productive collaboration on the MDS, C  
30  
31 Ramasundarahettige for technical assistance, M Puri and S Levitt for data extraction. The  
32  
33 opinions expressed in this article are those of the authors and do not necessarily represent  
34  
35 those of the Government of India or the RGI.  
36  
37  
38  
39

## 40 41 **COMPETING INTERESTS**

42 We declare that we have no competing interests.  
43  
44  
45

## 46 47 **FUNDING**

48  
49 This study is supported by grants from the John E Fogarty International Center of the National  
50  
51 Institutes of Health (R01-TW05991-01 and TW07939-01), the Bill & Melinda Gates Foundation  
52  
53 through the Disease Control Priorities Network Project, and the University of Toronto (to PJ); the  
54  
55 Canada Research Chair Programme (to PJ and ABN); and the Canadian Institutes of Health  
56  
57 Research Doctoral Award (to MH). The funding sources had no role in the study design; data  
58  
59  
60

1  
2  
3 collection, analysis, interpretation; writing of the manuscript; or decision to submit for publication.

4  
5 The senior author had full access to all the data in the study and had final responsibility for the  
6  
7 decision to submit this study for publication.  
8  
9

## 10 11 **AUTHOR'S CONTRIBUTION**

12  
13 PJ and the MDS Collaborators (appendix) designed, planned, the executed the MDS in close  
14  
15 collaboration with the Office of the Registrar General of India (RGI). MH and PJ performed the  
16  
17 data analysis. All authors contributed to data interpretation, revisions of the manuscript, and  
18  
19 provided final approval. PJ is the guarantor for this report.  
20  
21  
22  
23

## 24 25 **DATA SHARING STATEMENT**

26  
27 Data used in this study are the property of the Registrar General of India and the overall  
28  
29 mortality results have been published in 2009.[47] This specific analyses is produced under an  
30  
31 agreement with CGHR.  
32  
33  
34  
35  
36  
37  
38  
39  
40  
41  
42  
43  
44  
45  
46  
47  
48  
49  
50  
51  
52  
53  
54  
55  
56  
57  
58  
59  
60

## REFERENCES

- 1 Peden M, Scurfield R, Sleet D, *et al*. World report on road traffic injury prevention: World Health Organization 2004;1–244.
- 2 Chisholm D, Naci H, Hyder AA, *et al*. Cost effectiveness of strategies to combat road traffic injuries in sub-Saharan Africa and South East Asia: mathematical modelling study. *BMJ* 2012;**344**:e612.
- 3 The PLoS Medicine Editors. Preventing Road Deaths—Time for Data. *PLoS Med* 2010;**7**:e1000257.
- 4 Barffour M, Gupta S, Gururaj G, *et al*. Evidence-based road safety practice in India: assessment of the adequacy of publicly available data in meeting requirements for comprehensive road safety data systems. *Traffic Inj Prev* 2012;**13 Suppl 1**:17–23.
- 5 Kopits E, Cropper ML. *Traffic fatalities and economic growth*. World Bank Development Research Group Environment and Infrastructure, 2003.
- 6 Sathiyasekaran BW. Population-based cohort study of injuries. *Injury* 1996;**27**:695–8.
- 7 Varghese M, Mohan D. Transportation injuries in rural Haryana, North India. *In: Proceedings of the international conference on traffic safety 2003*;326–9.
- 8 WHO. Injury Prevention and Control: An epidemiological study of injuries in the area of Municipal Corporation of Delhi. *Regional Office for South-East Asia* 2003;1–18.
- 9 Gururaj G, Suryanarayana SP. Burden and impact of injuries: Results of population-based survey. *Proceedings of the 7th world conference on injury prevention 2004*;275–6.
- 10 Dandona R. Patterns of road traffic injuries in a vulnerable population in Hyderabad, India.

- 1  
2  
3  
4  
5  
6  
7  
8  
9  
10  
11  
12  
13  
14  
15  
16  
17  
18  
19  
20  
21  
22  
23  
24  
25  
26  
27  
28  
29  
30  
31  
32  
33  
34  
35  
36  
37  
38  
39  
40  
41  
42  
43  
44  
45  
46  
47  
48  
49  
50  
51  
52  
53  
54  
55  
56  
57  
58  
59  
60
- Injury Prevention* 2006;**12**:183–8.
- 11 Dandona R, Kumar GA, Ameer MA, *et al.* Incidence and burden of road traffic injuries in urban India. *Inj Prev* 2008;**14**:354–9.
- 12 Gururaj G. Road traffic deaths, injuries and disabilities in India: current scenario. *Natl Med J India* 2008;**21**:14–20.
- 13 Garg N, Hyder A. Road traffic injuries in India: A review of the literature. *Scand J of Public Health* 2006;**34**:100–9.
- 14 World Health Organization. *The Global Burden of Disease: 2004 Update*. World Health Organization 2008.
- 15 Mathers CD, Bernard C, Moesgaard Iburg K, *et al.* Global Burden of Disease in 2002: data sources, methods, and results. Global Programme on Evidence for Health Policy Discussion Paper No. 54. World Health Organization 2003.
- 16 Jha P, Gajalakshmi V, Gupta PC, *et al.* Prospective Study of One Million Deaths in India: Rationale, Design, and Validation Results. *PLoS Med* 2006;**3**:e18.
- 17 Million Death Study Collaborators,. Causes of neonatal and child mortality in India: a nationally representative mortality survey. *Lancet* 2010;**376**:1853–60.
- 18 Dikshit R, Gupta PC, Ramasundarahettige C, *et al.* Cancer mortality in India: a nationally representative survey. *Lancet* 2012;**379**:1807–16.
- 19 Patel V, Ramasundarahettige C, Vijayakumar L, *et al.* Suicide mortality in India: a nationally representative survey. *Lancet* 2012;**379**:2343–51.
- 20 Sinha DN, Dikshit R, Kumar R, *et al.* Prospective Study of Million Deaths in India: Technical

- document no VIII: Health care professional's manual for assigning causes of death based on RHIME household reports. RGI-CGHR, University of Toronto. 2011.<http://www.cghr.org/mds> (accessed 1 Aug2012).
- 21 WHO. *International Statistical Classification of Diseases and Related Health Problems, ICD-10: Three Volume Set*. World Health Organization 2010.
- 22 United Nations Populations Division. World population prospects (2008 revision). 2009.<http://www.un.org/esa/population/publications/wpp2008/> (accessed 2 July 2011).
- 23 Mari Bhat PN. Completeness of India's sample registration system: an assessment using the general growth balance method. *Popul Stud* 2002;**56**:119–34.
- 24 Sivanandan V. *An assessment of the completeness of death registration in India over the periods 1975-1978 and 1996-1999 under the generalized population model: an analysis based on SRS data*. Mumbai: International Institute for Population Sciences2004.
- 25 Jha P, Kumar R, Khera A, *et al*. HIV mortality and infection in India: estimates from nationally representative mortality survey of 1.1 million homes. *BMJ* 2010;**340**:c621.
- 26 Dhingra N, Jha P, Sharma VP, *et al*. Adult and child malaria mortality in India: a nationally representative mortality survey. *Lancet* 2010;**376**:1768–74.
- 27 National Crime Records Bureau. *Accidental Deaths and Suicides in India, 2005*. Ministry of Home Affairs, Government of India2005.
- 28 Dandona R, Kumar GA, Ameer MA, *et al*. Under-reporting of road traffic injuries to the police: results from two data sources in urban India. *Inj Prev* 2008;**14**:360–5.
- 29 Alcorn T. Uncertainty clouds China's road-traffic fatality data. *Lancet* 2011;**378**:305–6.

- 1  
2  
3 30 Naci H, Chisholm D, Baker TD. Distribution of road traffic deaths by road user group: a  
4 global comparison. *Inj Prev* 2009;**15**:55–9.  
5  
6  
7  
8  
9 31 Mohan D. *The road ahead: Traffic injuries and fatalities in India*. Transportation research  
10 and injury prevention programme, Indian Institute of Technology, Delhi2004.  
11  
12  
13 32 Mohan D. Traffic safety and health in Indian cities. *Journal of Transport and Infrastructure*  
14 2002;**9**:79–94.  
15  
16  
17  
18  
19 33 Norton R, Hyder A, Bishai D, *et al*. Unintentional Injuries. In: *Disease Control Priorities in*  
20 *Developing Countries*. Oxford University Press, USA2006.  
21  
22  
23  
24 34 Grimm M, Treibich C. Determinants of road traffic crash fatalities across Indian states.  
25 *Health Econ* Published Online First: 30 August 2012. doi:10.1002/hec.2870  
26  
27  
28  
29  
30 35 Ngo AD, Rao C, Phuong Hoa N, *et al*. Road traffic related mortality in Vietnam: Evidence  
31 for policy from a national sample mortality surveillance system. *BMC Public Health*  
32 2012;**12**:561.  
33  
34  
35  
36  
37 36 Hsiao M, Morris SK, Bassani DG, *et al*. Factors Associated with Physician Agreement on  
38 Verbal Autopsy of over 11500 Injury Deaths in India. *PLoS ONE* 2012;**7**:e30336.  
39  
40  
41  
42 37 Singh H, Dhatarwal SK. Pattern and distribution of injuries in fatal road traffic accidents in  
43 Rohtak (Haryana). *Journal of Indian Academy of Forensic Medicine* 2004;**26**:20–3.  
44  
45  
46  
47  
48 38 Dandona R, Mishra A. Deaths due to road traffic crashed in Hyderabad city in India: need  
49 for strengthening surveillance. *Natl Med J India* 2004;**17**:74–9.  
50  
51  
52  
53 39 Sahdev P, Lacqua MJ, Singh B, *et al*. Road traffic fatalities in Delhi: causes, injury patterns,  
54 and incidence of preventable deaths. *Accident Analysis & Prevention* 1994;**26**:377–84.  
55  
56  
57  
58  
59  
60



- 1  
2  
3 40 Bhattacharjee J, Bora D, Sharma RS, *et al.* Unnatural deaths in Delhi during 1991. *Med Sci*  
4  
5 *Law* 1996;**36**:194–8.  
6  
7  
8  
9 41 Jain A, Menezes RG, Kanchan T, *et al.* Two wheeler accidents on Indian roads--a study  
10  
11 from Mangalore, India. *J Forensic Leg Med* 2009;**16**:130–3.  
12  
13  
14 42 Gururaj G, Shastry KVR, Chandramouli AB, *et al.* *Traumatic brain injury*. Bangalore:  
15  
16 National Institute of Mental Health and Neuro Sciences, 2005.  
17  
18  
19 43 Colohan AR, Alves WM, Gross CR, *et al.* Head injury mortality in two centers with different  
20  
21 emergency medical services and intensive care. *J Neurosurg Pediatrics* 1989;**71**:202–7.  
22  
23  
24 44 National Crime Records Bureau. *Accidental Deaths and Suicides in India, 2011*. Ministry of  
25  
26 Home Affairs, Government of India 2011.  
27  
28  
29  
30 45 Transport Research Wing, Ministry of Road Transport & Highways. Basic Road Statistics of  
31  
32 India. Government of India 2012.  
33  
34  
35 46 Transport Research Wing, Ministry of Road Transport & Highways. Road Transport Year  
36  
37 Book (2009-10 & 2010-11). Government of India 2012.  
38  
39  
40 47 Registrar General of India and Centre for Global Health Research. *Causes of Death in*  
41  
42 *India, 2001-2003: Sample Registration System*. Government of India 2009.  
43  
44  
45  
46  
47  
48  
49  
50  
51  
52  
53  
54  
55  
56  
57  
58  
59  
60

## FIGURE LEGENDS

### Figure 1: Road traffic injury deaths, age-standardized death rate, and cumulative risk (age 0-69 years) across states and regions of India, by gender.

Death rates are standardized to the 2005 United Nations estimated Indian population. Symbol size is proportional to sample size. Northeast states include Sikkim, Arunachal Pradesh, Nagaland, Manipur, Mizoram, Tripura, and Meghalaya. Total estimates include the 80 male and 19 female deaths from Pondicherry, Chandigarh, Uttarakhand, Dadra & Nagar Haveli, A&N Islands, Daman & Diu, Lakshadweep, and Goa. CHT=Chhatisgarh.

### Figure 2: Deceased mode of transportation, place of death, and timing of death.

(A) Deceased mode of transportation in present study compared to National Crime Records Bureau 2005 Report. Shaded line represents vulnerable road users (defined as road users without a rigid barrier protecting against traumatic forces, i.e. pedestrian, bicyclist, motorcyclist, and three wheelers). Percentages from present study are weighted by state and rural/urban residence. T=estimated/reported number of deaths in 2005 (in thousands). (B) Place of death and (C) timing of death based on verbal autopsy narratives. Shaded lines represent deaths that are reported as occurring at the scene of collision or occurring instantly (defined as within 5 minutes).

### Figure 3: Reported injuries from 1124 verbal autopsy narratives (49% of all 2299 RTI deaths).

Percentages refer to those in each row with given injury (columns). \*Values in bold denote two by two chi square tests with  $p < 0.05$  (excluding unknowns). Abdominal and spinal injuries were also reported but not shown due to small numbers (61 and 25 cases, respectively).

**LIST OF ACRONYMS**

|        |                                                                                                             |
|--------|-------------------------------------------------------------------------------------------------------------|
| CI     | Confidence interval                                                                                         |
| ICD-10 | International Statistical Classification of Diseases and Related Health Problems, 10 <sup>th</sup> Revision |
| LMIC   | Low- and middle-income countries                                                                            |
| MDS    | Million Death Study                                                                                         |
| NCRB   | National Crime Records Bureau                                                                               |
| RGI    | Registrar General of India                                                                                  |
| RTI    | Road traffic injury                                                                                         |
| SRS    | Sample registration system                                                                                  |
| UN     | United Nations                                                                                              |
| WHO    | World Health Organization                                                                                   |

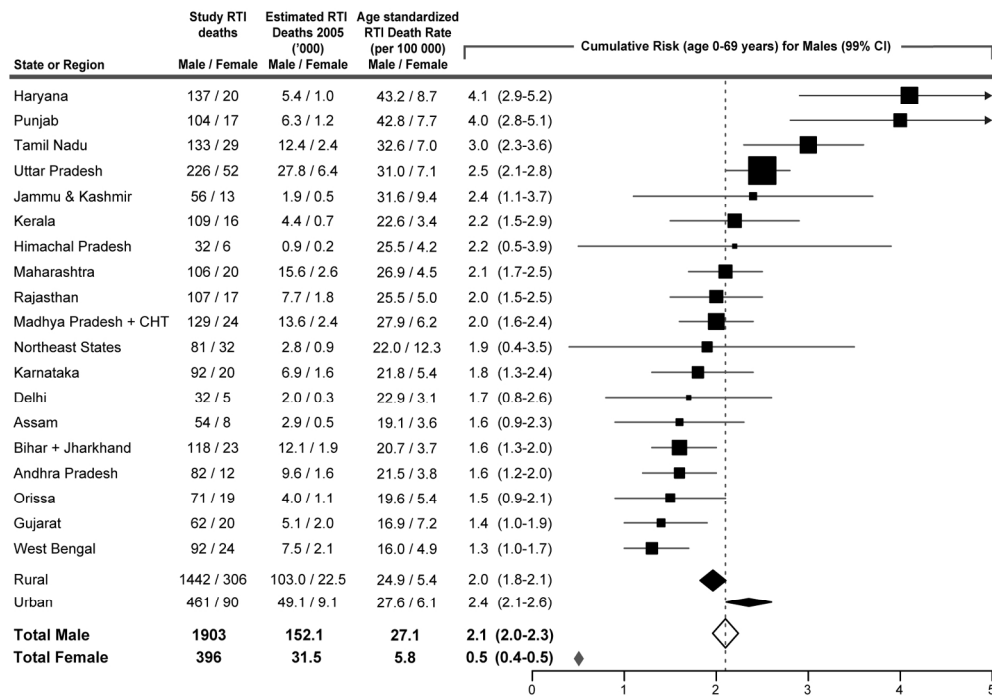

Figure 1: Road traffic injury deaths, age-standardized death rate, and cumulative risk (age 0-69 years) across states and regions of India, by gender.

Death rates are standardized to the 2005 United Nations estimated Indian population. Symbol size is proportional to sample size. Northeast states include Sikkim, Arunachal Pradesh, Nagaland, Manipur, Mizoram, Tripura, and Meghalaya. Total estimates include the 80 male and 19 female deaths from Pondicherry, Chandigarh, Uttarakhand, Dadra & Nagar Haveli, A&N Islands, Daman & Diu, Lakshadweep, and Goa. CHT=Chhatisgarh.

160x111mm (300 x 300 DPI)

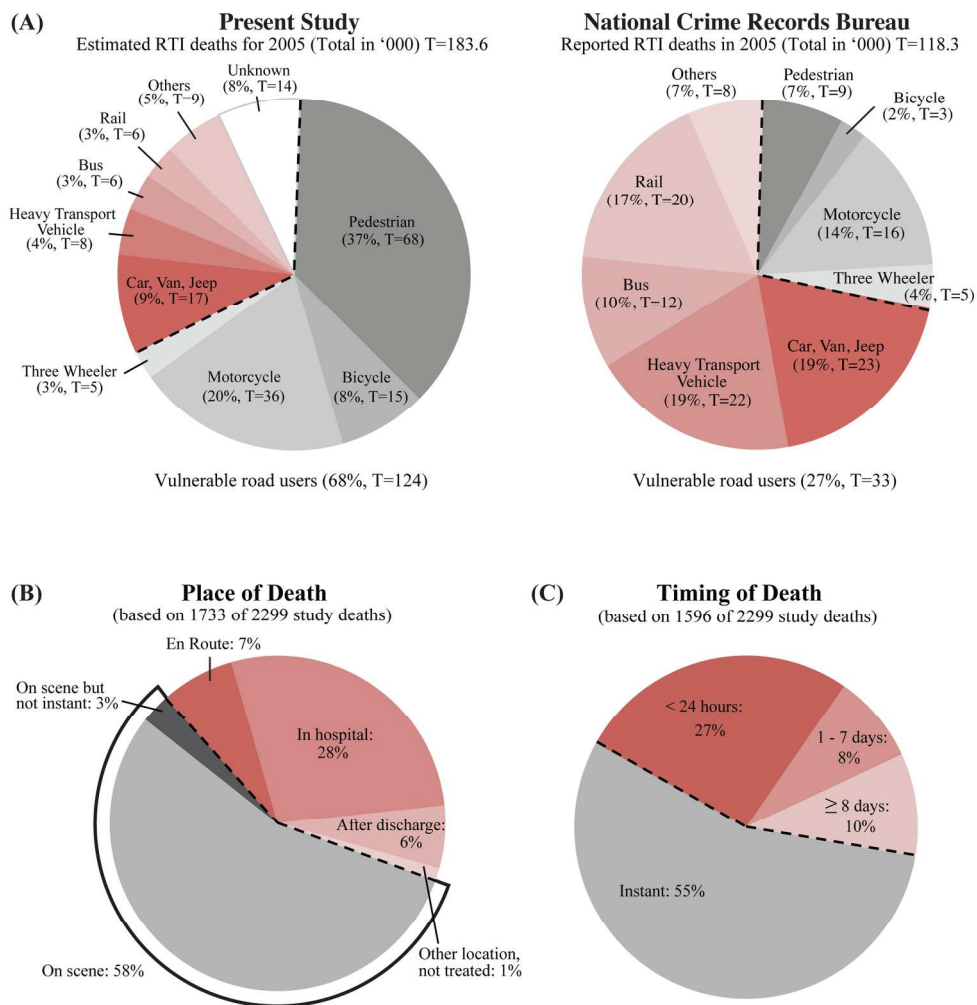

Figure 2: Deceased mode of transportation, place of death, and timing of death.  
(A) Deceased mode of transportation in present study compared to National Crime Records Bureau 2005 Report. Shaded line represents vulnerable road users (defined as road users without a rigid barrier protecting against traumatic forces, i.e. pedestrian, bicyclist, motorcyclist, and three wheelers). Percentages from present study are weighted by state and rural/urban residence. T=estimated/reported number of deaths in 2005 (in thousands). (B) Place of death and (C) timing of death based on verbal autopsy narratives. Shaded lines represent deaths that are reported as occurring at the scene of collision or occurring instantly (defined as within 5 minutes).

178x182mm (300 x 300 DPI)

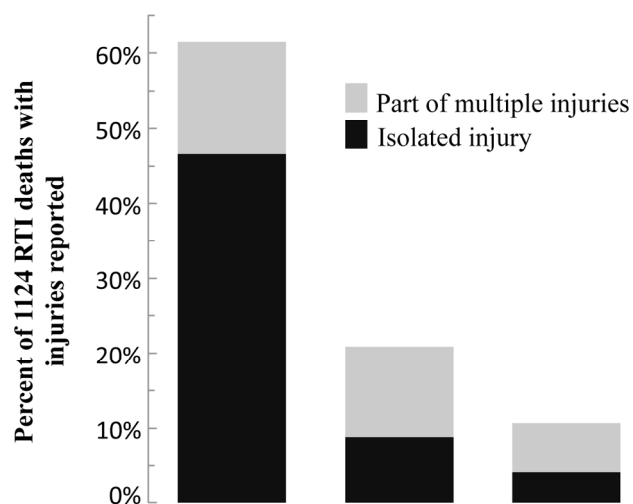

|                                                   | Head<br>n (%)    | Extremity<br>n (%) | Chest<br>n (%) |
|---------------------------------------------------|------------------|--------------------|----------------|
| <b>RTI deaths with reported injuries (N=1124)</b> | 691 (62)         | 235 (21)           | 120 (11)       |
| <b>Sex</b>                                        |                  |                    |                |
| Male (N=931)                                      | 584 (63)         | 194 (21)           | 105 (11)       |
| Female (N=193)                                    | 107 (55)         | 41 (21)            | 15 (8)         |
| <b>Place of Death</b>                             |                  |                    |                |
| Pre-hospital (N=492)                              | 322 (65)         | <b>56 (11)*</b>    | 44 (9)         |
| Hospital or other (N=457)                         | 291 (64)         | <b>142 (31)*</b>   | 58 (13)        |
| Unknown (N=175)                                   | 78 (45)          | 37 (21)            | 18 (10)        |
| <b>Timing of Death</b>                            |                  |                    |                |
| Instant (N=347)                                   | 216 (62)         | <b>28 (8)*</b>     | 29 (8)         |
| Later (N=521)                                     | 344 (66)         | <b>145 (28)*</b>   | 62 (12)        |
| Unknown (N=256)                                   | 131 (51)         | 62 (24)            | 29 (11)        |
| <b>Mode of Transportation</b>                     |                  |                    |                |
| Motorcycle (N=241)                                | <b>188 (78)*</b> | 51 (21)            | 18 (7)         |
| Non-motorcycle (N=807)                            | <b>457 (57)*</b> | 160 (20)           | 95 (12)        |
| Unknown (N=76)                                    | 46 (61)          | 24 (32)            | 7 (9)          |

Figure 3: Reported injuries from 1124 verbal autopsy narratives (49% of all 2299 RTI deaths). Percentages refer to those in each row with given injury (columns). \*Values in bold denote two by two chi square tests with  $p < 0.05$  (excluding unknowns). Abdominal and spinal injuries were also reported but not shown due to small numbers (61 and 25 cases, respectively).

141x191mm (300 x 300 DPI)

|                               | Narrative section |                      |       | Timing of Death  |                      |       | Place of Death   |                      |       | Deceased Mode of Transportation |                      |       | Injury Reported  |                      |       |
|-------------------------------|-------------------|----------------------|-------|------------------|----------------------|-------|------------------|----------------------|-------|---------------------------------|----------------------|-------|------------------|----------------------|-------|
|                               | Missing<br>n (%)  | Not missing<br>n (%) | p     | Missing<br>n (%) | Not missing<br>n (%) | p     | Missing<br>n (%) | Not missing<br>n (%) | p     | Missing<br>n (%)                | Not missing<br>n (%) | p     | Missing<br>n (%) | Not missing<br>n (%) | p     |
| 1 <b>all RTI (n=2299)</b>     | 142 (6.2)         | 2157 (93.8)          |       | 703 (30.6)       | 1596 (69.4)          |       | 566 (24.6)       | 1733 (75.4)          |       | 194 (8.4)                       | 2105 (91.6)          |       | 1175 (51.1)      | 1124 (48.9)          |       |
| 2 <b>age</b>                  |                   |                      |       |                  |                      |       |                  |                      |       |                                 |                      |       |                  |                      |       |
| 3 <20 years                   | 12 (2.9)          | 402 (97.1)           | 0.002 | 106 (25.6)       | 308 (74.4)           | 0.015 | 90 (21.7)        | 324 (78.0)           | 0.133 | 37 (8.9)                        | 377 (91.1)           | 0.687 | 199 (48.1)       | 215 (51.9)           | 0.172 |
| 4 ≥20 years                   | 130 (6.9)         | 1755 (93.1)          |       | 597 (31.7)       | 1288 (68.3)          |       | 476 (25.3)       | 1409 (75.0)          |       | 157 (8.3)                       | 1728 (91.7)          |       | 976 (51.8)       | 909 (48.2)           |       |
| 5 <b>sex</b>                  |                   |                      |       |                  |                      |       |                  |                      |       |                                 |                      |       |                  |                      |       |
| 6 male                        | 118 (6.2)         | 1785 (93.8)          | 0.916 | 582 (30.6)       | 1321 (69.4)          | 0.991 | 461 (24.2)       | 1442 (75.8)          | 0.336 | 161 (8.5)                       | 1742 (91.5)          | 0.934 | 972 (51.1)       | 931 (48.9)           | 0.946 |
| 7 female                      | 24 (6.1)          | 372 (93.9)           |       | 121 (30.6)       | 275 (69.4)           |       | 105 (26.5)       | 291 (73.5)           |       | 33 (8.3)                        | 363 (91.7)           |       | 203 (51.3)       | 193 (48.7)           |       |
| 8 <b>location</b>             |                   |                      |       |                  |                      |       |                  |                      |       |                                 |                      |       |                  |                      |       |
| 9 rural                       | 125 (7.2)         | 1623 (92.9)          | 0.001 | 559 (32.0)       | 1189 (68.0)          | 0.009 | 456 (26.1)       | 1292 (73.9)          | 0.004 | 143 (8.2)                       | 1605 (91.8)          | 0.429 | 896 (51.3)       | 852 (48.7)           | 0.799 |
| 10 urban                      | 17 (3.1)          | 534 (96.9)           |       | 144 (26.1)       | 407 (73.9)           |       | 110 (20.0)       | 441 (80.0)           |       | 51 (9.3)                        | 500 (90.7)           |       | 279 (50.6)       | 272 (49.4)           |       |
| 11 <b>neighbourhood asset</b> |                   |                      |       |                  |                      |       |                  |                      |       |                                 |                      |       |                  |                      |       |
| 12 low                        | 126 (7.5)         | 1548 (92.5)          | 0.001 | 552 (33.0)       | 1122 (67.0)          | 0.000 | 451 (26.9)       | 1223 (73.1)          | 0.001 | 136 (8.1)                       | 1538 (91.9)          | 0.468 | 883 (52.8)       | 791 (47.3)           | 0.057 |
| 13 high                       | 16 (3.2)          | 487 (96.8)           |       | 121 (24.1)       | 382 (75.9)           |       | 97 (19.3)        | 406 (80.7)           |       | 46 (9.2)                        | 457 (90.9)           |       | 241 (47.9)       | 262 (52.1)           |       |
| 14 missing                    | 0 (0.0)           | 122 (100.0)          |       | 30 (24.6)        | 92 (75.4)            |       | 18 (14.8)        | 104 (85.3)           |       | 12 (9.8)                        | 110 (90.2)           |       | 51 (41.8)        | 71 (58.2)            |       |
| 15 <b>education</b>           |                   |                      |       |                  |                      |       |                  |                      |       |                                 |                      |       |                  |                      |       |
| 16 below primary              | 38 (4.0)          | 916 (96)             | 0.000 | 289 (30.3)       | 665 (69.7)           | 0.894 | 230 (24.1)       | 724 (75.9)           | 0.719 | 80 (8.4)                        | 874 (91.6)           | 0.757 | 468 (49.1)       | 486 (50.9)           | 0.094 |
| 17 primary and above          | 100 (7.7)         | 1196 (92.3)          |       | 396 (30.6)       | 900 (69.4)           |       | 321 (24.8)       | 975 (75.2)           |       | 104 (8.0)                       | 1192 (92.0)          |       | 682 (52.6)       | 614 (47.4)           |       |
| 18 missing                    | 4 (8.2)           | 45 (91.8)            |       | 18 (36.7)        | 31 (63.3)            |       | 15 (30.6)        | 34 (69.4)            |       | 10 (20.4)                       | 39 (79.6)            |       | 25 (51.0)        | 24 (49.0)            |       |
| 19 <b>occupation</b>          |                   |                      |       |                  |                      |       |                  |                      |       |                                 |                      |       |                  |                      |       |
| 20 non-worker                 | 60 (8.1)          | 679 (91.9)           | 0.006 | 243 (32.9)       | 496 (67.1)           | 0.094 | 205 (27.7)       | 534 (72.3)           | 0.016 | 60 (8.1)                        | 679 (91.9)           | 0.701 | 381 (51.6)       | 358 (48.4)           | 0.757 |
| 21 worker                     | 81 (5.2)          | 1478 (94.8)          |       | 459 (29.4)       | 1100 (70.6)          |       | 360 (23.1)       | 1199 (76.9)          |       | 134 (8.6)                       | 1425 (91.4)          |       | 793 (50.9)       | 766 (49.1)           |       |
| 22 missing                    | 1 (100.0)         | 0 (0.0)              |       | 1 (100.0)        | 0 (0.0)              |       | 1 (100.0)        | 0 (0.0)              |       | 0 (0.0)                         | 1 (100.0)            |       | 1 (100.0)        | 0 (0.0)              |       |

**Supplementary Table 1: Summary of missing data.** There are no missing values for age, sex, and location in the study population. The chi square test was used to determine the p values and excluded deaths with missing neighbourhood asset, education, or occupation.

|                                  | Timing of Death was Instant |             |         | Place of Death was Prehospital |             |         | Head Injury was Reported |             |                 |
|----------------------------------|-----------------------------|-------------|---------|--------------------------------|-------------|---------|--------------------------|-------------|-----------------|
|                                  | n (%)                       | Adjusted OR | 99% CI  | n (%)                          | Adjusted OR | 99% CI  | n (%)                    | Adjusted OR | 99% CI          |
| 1 non-vulnerable road users      | 170 (58.6)                  | ref         | --      | 223 (69.5)                     | ref         | --      | 125 (31.5)               | ref         | --              |
| 2 vulnerable road users:         |                             |             |         |                                |             |         |                          |             |                 |
| 3 pedestrian                     | 338 (58.5)                  | 1.1         | 0.7-1.7 | 425 (69.1)                     | 1.1         | 0.7-1.7 | 192 (24.9)               | 0.8         | 0.5-1.1         |
| 4 bicyclist & motorcyclist       | 245 (52.0)                  | 0.8         | 0.5-1.1 | 306 (59.2)                     | 0.6         | 0.4-1.0 | 256 (43.5)               | <b>1.7*</b> | <b>1.2-2.5*</b> |
| 5 three wheelers & animal riders | 93 (56.4)                   | 0.9         | 0.5-1.6 | 117 (67.6)                     | 0.9         | 0.5-1.7 | 72 (33.0)                | 1.2         | 0.7-1.9         |
| 6 unknown                        | 37 (40.2)                   | 0.5         | 0.3-1.0 | 55 (51.4)                      | 0.5         | 0.3-1.0 | 46 (25.1)                | 0.8         | 0.5-1.4         |

8 **Supplementary Table 2: Association between deceased mode of transportation and the timing of death, place of death, and head injuries reported.** Odds ratios  
9 are adjusted for deceased's age, sex, rural/urban, neighbourhood asset, and education. \*Value in bold denote statistically significant difference between comparison  
10 groups.  
11



|    | 2005 UN population estimates (in '000) | Number of RTI deaths in 2005* |        | Crude RTI Death Rate in 2005 (per 100,000)* |      | % Under-reporting of Crude RTI Death Rate |      |
|----|----------------------------------------|-------------------------------|--------|---------------------------------------------|------|-------------------------------------------|------|
|    |                                        | MDS                           | NCRB   | MDS                                         | NCRB |                                           |      |
| 1  |                                        |                               |        |                                             |      |                                           |      |
| 2  | Northeast States                       | 13211                         | 3610   | 724                                         | 27.3 | 5.5                                       | 79.9 |
| 3  | Punjab                                 | 26455                         | 7380   | 1622                                        | 27.9 | 6.1                                       | 78.0 |
| 4  | Bihar + Jharkhand                      | 122181                        | 13172  | 3430                                        | 10.8 | 2.8                                       | 74.0 |
| 5  | Uttar Pradesh                          | 186591                        | 33287  | 9860                                        | 17.8 | 5.3                                       | 70.4 |
| 6  | Jammu & Kashmir                        | 11120                         | 2335   | 857                                         | 21.0 | 7.7                                       | 63.3 |
| 7  | Other States                           | 14121                         | 4037   | 1589                                        | 28.6 | 11.3                                      | 60.6 |
| 8  | Assam                                  | 29150                         | 3277   | 1456                                        | 11.2 | 5.0                                       | 55.6 |
| 9  | West Bengal                            | 86499                         | 9363   | 4364                                        | 10.8 | 5.0                                       | 53.4 |
| 10 | Madhya Pradesh + CDH                   | 90568                         | 15726  | 7686                                        | 17.4 | 8.5                                       | 51.1 |
| 11 | Haryana                                | 23688                         | 6128   | 3282                                        | 25.9 | 13.9                                      | 46.4 |
| 12 | Orissa                                 | 39485                         | 5083   | 2895                                        | 12.9 | 7.3                                       | 43.0 |
| 13 | Kerala                                 | 33785                         | 5051   | 3161                                        | 15.0 | 9.4                                       | 37.4 |
| 14 | Maharashtra                            | 106386                        | 16638  | 10613                                       | 15.6 | 10.0                                      | 36.2 |
| 15 | Rajasthan                              | 63375                         | 9237   | 6793                                        | 14.6 | 10.7                                      | 26.5 |
| 16 | Gujarat                                | 55926                         | 6987   | 5264                                        | 12.5 | 9.4                                       | 24.7 |
| 17 | Himachal Pradesh                       | 6559                          | 1077   | 854                                         | 16.4 | 13.0                                      | 20.7 |
| 18 | Karnataka                              | 57141                         | 8172   | 6876                                        | 14.3 | 12.0                                      | 15.9 |
| 19 | Delhi                                  | 16289                         | 2161   | 2023                                        | 13.3 | 12.4                                      | 6.4  |
| 20 | Tamil Nadu                             | 66154                         | 14808  | 13961                                       | 22.4 | 21.1                                      | 5.7  |
| 21 | Andhra Pradesh                         | 81934                         | 10991  | 10944                                       | 13.4 | 13.4                                      | 0.4  |
| 22 | Total                                  | 1130618                       | 178520 | 98254                                       | 15.8 | 8.7                                       | 45.0 |
| 23 |                                        |                               |        |                                             |      |                                           |      |
| 24 |                                        |                               |        |                                             |      |                                           |      |

**Supplementary Table 3: Comparison between present study (MDS) estimates and National Crime Records Bureau (NCRB) police reports of the number of RTI deaths and crude death rate, by state.** \*Excludes railroad deaths since NCRB does not publish state-level railroad death figures. Northeast States include Sikkim, Arunachal Pradesh, Nagaland, Manipur, Mizoram, Tripura, and Meghalaya. Other States include Pondicherry, Chandigarh, Uttaranchal, Dadra & Nagar Haveli, A & N Islands, Daman & Diu, Lakshadweep, and Goa. CDH = Chhatisgarh. % under reporting = (MDS death rate - NCRB death rate) / MDS death rate \*100%.

1  
2  
3  
4  
5  
6  
7  
8  
9  
10  
11  
12  
13  
14  
15  
16  
17  
18  
19  
20  
21  
22  
23  
24  
25  
26  
27  
28  
29  
30  
31  
32  
33  
34  
35  
36  
37  
38  
39  
40  
41  
42  
43  
44  
45  
46  
47  
48  
49  
50  
51  
52  
53  
54  
55  
56  
57  
58  
59  
60

## MILLION DEATH STUDY COLLOBORATORS

### Indian Academic Partners (in alphabetical order):

61. Department of Community Medicine Gujarat Medical College, Ahmedabad: DV Bala, P Seth, KN Trivedi
72. Department of Community Medicine Kolkatta Medical College, Kolkatta: SK Roy
83. Department of Community Medicine Regional Institute of Medical Sciences, Imphal: L Usharani
94. Department of Community Medicine S.C.B. Medical College Cuttack, Orissa: Dr. B Mohapatra
10. Department of Community Medicine SMS Medical College Jaipur: AK Bharadwaj, R Gupta
11. Epidemiological Research Center, Chennai: V Gajalakshmi, CV Kanimozhi
12. Gandhi Medical College, Bhopal: RP Dikshit, S Sorangi
13. Healis-Seskarhia Institute of Public Health, Navi Mumbai: PC Gupta, MS Pednekar, S Sreevidya
14. Apollo Institute of Medical Sciences & Research, Hyderabad: P Bhatia
15. St. John's Academy of Health Sciences, Bangalore: A Kurpad, P Mony, M Vaz, S Srinivasan, A Shet, AS Shet, D Xavier, S Rathi, V Habbare
18. King George Medical College, Lucknow: S Awasthi
19. Najafgarh Rural Health Training Centre, Ministry of Health Government of India, New Delhi: N Dhingra, J Sudhir, I Rawat (until 2007)
213. Regional Medical Research Center, ICMR Institute, Bhubaneshwar: AS Karketta, SK Dar
24. School of Preventative Oncology, Patna: DN Sinha
25. School of Public Health Post Graduate Institute of Medical Education and Research, Chandigarh: N Kaur, R Kumar, JS Thakur
26. Tata Memorial Cancer Hospital, Mumbai: RA Badwe, RP Dikshit, M Mallath, K Panse, A Budukh

### Lead Partners:

29. Office of the Registrar-General India, RK Puram, New Delhi India: C Chandramouli (Registrar General of India [RGI]), C Sethi, B Mishra (until 2012), S Jain (until 2008), DK Dey, AK Saxena, MS Thapa, N Kumar; JK Banthia and DK Sikri (former RGIs)
33. Million Death Study Coordinating Centre for Global Health Research (CGHR) Li Ka Shing Knowledge Institute, St. Michael's Hospital, Dalla Lana School of Public Health, University of Toronto, Canada: P Jha (Principal Investigator), R Kamadod, S Rathi, S Rao-Seshadri, P Rodriguez, P Sati, J Sudhir, C Ramasundarahettige, W Suraweera

### Affiliated Partners:

38. Indian Council of Medical Research, New Delhi India: VM Katoch (Director General or DG from 2008), NK Ganguly (DG to 2008), L Kant, B Bhattacharya, B Shah, DK Shukla
41. World Health Organisation, Geneva and SEARO Office, New Delhi: T Boerma, A Fric, S Habayeb (former WHO Representative-India), S Khanum, CD Mathers, DN Sinha, N Singh, P Singh (Deputy Regional Director)
43. Clinical Trial Service Unit and Epidemiological Studies Unit (CTSU), University of Oxford, England: N Bhala, J Boreham, R Peto, G Whitlock

## Road traffic injury mortality and its mechanisms in India: nationally representative mortality survey of 1.1 million homes

Marvin Hsiao, Ajai Malhotra, JS Thakur, Jay K Sheth, Avery B Nathens, Neeraj Dhingra, Prabhat Jha, for the Million Death Study Collaborators.

Centre for Global Health Research, Li Ka Shing Knowledge Institute, St Michael's Hospital, University of Toronto, Toronto, Canada (M Hsiao MD, Prof P Jha DPhil); Division of General Surgery, Department of Surgery, University of Toronto, Toronto, Canada (M Hsiao MD, Prof AB Nathens MD); Department of Surgery, VCU Medical Center, Virginia Commonwealth University, Richmond, USA (Prof A Malhotra MD); Department of Community Medicine, Post Graduate Institute of Medical Education and Research, Chandigarh, India (JS Thakur MD); Smt. N.H.L. Municipal Medical College, Ahmedabad, India (JK Sheth MD); Sunnybrook Research Institute, Sunnybrook Health Sciences Centre, Toronto, Canada (Prof AB Nathens MD); National AIDS Control Organization, New Delhi, India (N Dhingra MD)

Correspondence to:

Marvin Hsiao

Centre for Global Health Research, Li Ka Shing Knowledge Institute, St Michael's Hospital, and Division of General Surgery, Department of Surgery, University of Toronto  
30 Bond Street, Toronto, Ontario, Canada M5B 1W8

[marvin.my.hsiao@gmail.com](mailto:marvin.my.hsiao@gmail.com)

+1 416-864-6042 (phone) / +1 416-864-5256 (fax)

Keywords: Road traffic injury; verbal autopsy; India; low- and middle-income countries

| Word count: Text: 33613440

**ABSTRACT:**

**Objectives:** To quantify and describe the mechanism of road traffic injury (RTI) deaths in India.

**Design:** We conducted a nationally representative mortality survey where at least two physicians coded each non-medical field staff's verbal autopsy reports. RTI mechanism data were extracted from the narrative section of these reports.

**Setting:** 1.1 million homes in India.

**Participants:** Over 122 000 deaths at all ages from 2001-2003.

**Primary and secondary outcome measures:** Age- and sex-specific mortality rates, place and timing of death, modes of transportation, and injuries sustained.

**Results:** The 2299 RTI deaths in the survey correspond to an estimated 183 600 RTI deaths or about 2% of all deaths in 2005 nationally, of which 65% occurred in males between the ages of 15-59 years. The age-adjusted mortality rate was greater in males than in females, in urban than in rural areas, and was notably higher than that estimated from national police records. Pedestrians (68 000), motorcyclists (36 000), and other vulnerable road users (20 000) constituted 68% of RTI deaths (124 000) nationally. Among the study sample, the majority of all RTI deaths occurred at the scene of collision (1005/1733, 58%), within minutes of collision (883/1596, 55%), and/or involved a head injury (691/1124, 62%). Compared to non-pedestrian RTI deaths, about 55 000 (81%) of pedestrian deaths were associated with less education and living in poorer neighbourhoods.

**Conclusions:** In India, RTI cause a substantial number of deaths, particularly among pedestrians and other vulnerable road users. Interventions to prevent collisions and reduce injuries might address over half of the RTI deaths. Improved pre-hospital transport and hospital trauma care might address just over a third of the RTI deaths.

## ARTICLE SUMMARY

### Article focus

- To directly estimate the age- and sex-specific mortality rates and describe the place and timing of death, modes of transportation, and injuries sustained for road traffic injury (RTI) deaths in India using a nationally representative mortality survey of 1.1 million homes.

### Key messages

- Road traffic injuries cause a substantial number of avertable deaths, particularly in males of productive working age and among pedestrians and other vulnerable road users.
- Preventative interventions should be emphasized as the majority of all RTI deaths occurred at the scene of collision, within minutes of collision, and/or involved a head injury.
- Properly designed mortality survey with verbal autopsy narratives can provide much-needed data to assist RTI prevention efforts.

### Strengths and limitations of this study

- This study is the first nationally representative survey of the causes of death in India and overcomes limitations of existing data sources including regional injury surveys, hospital series, and national police reports.
- Limitations of the study include potential misclassification of deaths by physician coders, the use of layperson narratives with a potential for recall bias and inaccuracies, and limited ability to forward project study results given the rapid changes in motorization in India.

## INTRODUCTION

Road traffic injuries (RTI) are a large and growing public health burden, especially in low- and middle-income countries (LMIC) where 90% of the world's deaths due to RTI are estimated to occur.[1] There are few high-quality epidemiologic data on RTI to guide the development, implementation, and surveillance of evidence-based policy and programs in LMICs.[2-4]

The number of deaths due to RTI in India is projected to rise with increasing motorization.[1,5] Aside from a few regional injury surveys,[6-11] the current data on the numbers and mechanisms of RTI deaths in India rely on police or hospital records, both of which can substantially underestimate death rates in the poor, rural, and uneducated people who still constitute large proportions of the Indian population.[2-4,12,13]

The World Health Organization (WHO), using indirect modeling methods, estimated about 202 000 RTI deaths in India in 2004.[14,15] No study has validated this estimate with direct measurement nor documented detailed RTI mechanism for India nationally. Here, we estimate the regional, age- and sex-specific mortality rate and risk of RTI death in India using data from the Million Death Study (MDS). We also report the modes of transportation, place and timing of death, and injuries sustained in RTI deaths.

## METHODS

**Study Design:** The MDS is an on-going nationally representative survey designed to determine the causes and risk factors of death in India, organized by the Registrar General of India (RGI). The design, methodology, and preliminary findings of the MDS have been described elsewhere.[16-19] In brief, the MDS used an enhanced version of verbal autopsy (known as the routine, reliable, representative, re-sampled household investigation of mortality with medical evaluation or RHIME) to monitor a nationally representative sample of 1.1 million households in the Sample Registration System (SRS). Within six months of every death occurring in these households from 2001-3, a trained, nonmedical RGI surveyor interviewed a relative or close-acquaintance of the deceased to obtain the symptoms and events around the death using structured questions and a local language narrative guided by a specific symptom list. These records were converted into electronic records and emailed to two of 140 trained physicians who, independently and anonymously, assigned an underlying cause of death (with allocation determined randomly based only on the physician's ability to read the local language), using guidelines for the major causes of death.[20] Records were assigned cause of death in three-digit International Statistical Classification of Diseases and Related Health Problems, 10th revision (ICD-10).[21] Records where coders disagreed on the cause of death underwent anonymous reconciliation. Continuing disagreements were adjudicated by a third senior physician. Five percent of households were randomly resurveyed and the results were consistent within families of ICD-10 codes.[16] Participation in the SRS is on a voluntary basis and oral consent was obtained under the confidentiality and consent procedures of the Registration of Births and Deaths Act, 1969.

**Road Traffic Injury Deaths:** The RTI deaths in this study were of people who died between 2001 and 2003 with a final assigned ICD-10 code within V01-V89. We translated the open-ended narratives into English from 14 local languages, and systematically extracted the modes

1  
2  
3 of transportation, place and timing of death, and injuries sustained from 2157 of the 2299 RTI  
4 deaths using a standardized data extraction tool and procedure (the remaining 142 deaths, 6%,  
5 had missing or illegible narratives). For these four data elements, there were substantial inter-  
6 rater agreement between two investigators and two research assistants who were trained and  
7 independently extracted data from the narratives of a random 10% of RTI deaths (lowest kappa  
8 statistic was greater than 0.69 for all pair-wise comparisons between the four data extractors;  
9 data not shown). The two research assistants then independently extracted data from all  
10 narratives. Adjudication was done by an investigator (MH) for discrepancies in extracted data.  
11  
12  
13  
14  
15  
16  
17  
18  
19  
20  
21  
22

**Analysis:** The age and sex-specific proportion of RTI deaths within the 2001-2003 survey was  
23 applied to the 2005 United Nations (UN) estimates of the number of deaths from all causes in  
24 India, after weighting for sampling probability for each rural or urban stratum per state (although  
25 such weighting made little difference because the study was nationally representative). [18,22]  
26  
27  
28  
29  
30

31 The 2005 UN death estimates were used so as to correct for the slight undercounts reported in  
32 the total death rates in the SRS [23,24] and to account for the 12% of enumerated deaths  
33 without completed field visits (mostly due to out-migration of the family or from incomplete field  
34 records). The proportion of these missed deaths was similarly dispersed across sex, age, and  
35 states. Use of 2003 or 2004 UN death totals yielded nearly identical results (data not shown).  
36  
37  
38  
39  
40  
41

42 The 99% confidence intervals (99%CI) for mortality rate were calculated based on the weighted  
43 number of study deaths. State- and rural/urban-specific estimates of the number, mortality rate,  
44 and lifetime risk of RTI death were calculated by partitioning the UN national death totals  
45 according to relative SRS death rates as previously described. [18,25,26] Urban and rural status  
46 was defined according to the Census of India. Logistic regression was used to compare the  
47 socio-demographic traits of pedestrian and non-pedestrian RTI deaths. Household fuel type was  
48 used as a measure of community wealth, based on earlier principal component analyses [18]:  
49 high asset neighbourhoods had >50% of households that used gas, electricity, or kerosene; low  
50  
51  
52  
53  
54  
55  
56  
57  
58  
59  
60



1  
2  
3 asset or poor neighbourhoods used primarily coal, firewood, or other. Attributable proportion  
4  
5 was calculated for traits of pedestrian deaths compared to non-pedestrian RTI deaths.  
6  
7  
8

9  
10 The MDS received ethics approval from the review boards of the Post-Graduate Institute of  
11  
12 Medical Education and Research in Chandigarh, India; St Michael's Hospital in Toronto,  
13  
14 Canada; and the Indian Council of Medical Research's Health Ministry's Screening Committee.  
15  
16  
17  
18  
19

## 20 21 **RESULTS**

22  
23 The 2299 RTI deaths in the 2001-2003 survey correspond to an estimated 183 600 (99%CI 173  
24  
25 800-193 400) RTI deaths in India in 2005. The majority of these RTI deaths occurred in males  
26  
27 (152 100 deaths, 82.8%; table 1). The age-standardized RTI mortality rate for males (26.2 per  
28  
29 100 000, 24.6-27.7) was higher than for females (5.7 per 100 000, 5.0-6.4). While the RTI  
30  
31 mortality rate increased with age in both genders, the largest number of RTI deaths occurred in  
32  
33 males between 15-59 years of age (118 900, 64.8%).  
34  
35  
36  
37

38 At these death rates and in the theoretical absence of other causes of death, males in India had  
39  
40 a 2.1% (2.0-2.3) risk of dying from RTI before age 70, with the highest risks at ages 30-59  
41  
42 years; females had a 0.5% (0.4-0.5) risk of dying from RTI before age 70. Males in Haryana,  
43  
44 Punjab, Tamil Nadu, and Uttar Pradesh had significantly higher risks (3.0-4.1%) than the  
45  
46 national risk (figure 1). In contrast, males in Bihar, Jharkhand, Andhra Pradesh, Orissa, Gujarat,  
47  
48 and West Bengal had significantly lower risks (1.3-1.6%) than the national risk of RTI deaths.  
49  
50 Males living in urban areas had slightly higher age-standardized mortality rates and risks of RTI  
51  
52 deaths (27.6 per 100 000; 2.4%, 2.1-2.6) compared to males living in rural areas (24.9 per 100  
53  
54 000; 2.0%, 1.8-2.1). By contrast, female RTI mortality rates and risks before age 70 varied much  
55  
56 less across states and were similar in rural and urban areas (data not shown).  
57  
58  
59  
60

## Study deaths, 2001-2003

## All India, 2005

|                                            | Number of RTI deaths / all coded deaths | Proportion RTI* | Rural (%**) | Two coders immediately agree | All deaths / population (millions, 2005 UN estimates) | Estimated RTI deaths§, thousands | RTI death rateΨ per 100 000 (99% CI) | Period risk for RTI death† |
|--------------------------------------------|-----------------------------------------|-----------------|-------------|------------------------------|-------------------------------------------------------|----------------------------------|--------------------------------------|----------------------------|
| <b>Male - age in years</b>                 |                                         |                 |             |                              |                                                       |                                  |                                      |                            |
| 0-4                                        | 44 / 11719                              | 0.4%            | 37 (76.7)   | 44                           | 1.2 / 67                                              | 4.9                              | 7.4 (6.5-8.4)¶                       | 0.04%                      |
| 5-14                                       | 97 / 1926                               | 5.2%            | 86 (84.1)   | 87                           | 0.2 / 129                                             | 8.5                              | 6.6 (4.9-8.3)                        | 0.1%                       |
| 15-29                                      | 605 / 4727                              | 13.0%           | 462 (68.9)  | 558                          | 0.4 / 163                                             | 47.1                             | 28.9 (25.9-31.9)                     | 0.4%                       |
| 30-44                                      | 529 / 6817                              | 7.7%            | 385 (67.0)  | 477                          | 0.6 / 115                                             | 43.8                             | 37.9 (33.7-42.1)                     | 0.6%                       |
| 45-59                                      | 356 / 11731                             | 3.0%            | 249 (60.9)  | 312                          | 0.9 / 73                                              | 28.0                             | 38.4 (33.2-43.6)                     | 0.6%                       |
| 60-69                                      | 149 / 12120                             | 1.2%            | 117 (71.8)  | 133                          | 0.9 / 24                                              | 10.6                             | 44.0 (34.6-53.4)                     | 0.5%                       |
| >70                                        | 123 / 18732                             | 0.6%            | 106 (81.2)  | 98                           | 1.3 / 14                                              | 9.1                              | 64.5 (49.1-80.0)                     | --                         |
| All ages                                   | 1903 / 67772                            | 2.8%            | 1442 (68.9) | 1709                         | 5.3 / 585                                             | 152.1                            | 26.2                                 | 2.1%†                      |
| (% or 99% CI)                              |                                         |                 |             | (89.8%)                      |                                                       | (143.2-161.0)                    | (24.6-27.7)                          | (2.0-2.3)                  |
| <b>Female - age in years</b>               |                                         |                 |             |                              |                                                       |                                  |                                      |                            |
| 0-4                                        | 50 / 11492                              | 0.4%            | 46 (93.4)   | 45                           | 1.2 / 61                                              | 5.0                              | 8.1 (7.1-9.1)¶                       | 0.04%                      |
| 5-14                                       | 44 / 1955                               | 2.3%            | 38 (80.1)   | 43                           | 0.2 / 118                                             | 3.8                              | 3.2 (2.0-4.4)                        | 0.03%                      |
| 15-29                                      | 72 / 4394                               | 1.5%            | 53 (60.5)   | 63                           | 0.3 / 150                                             | 5.3                              | 3.5 (2.4-4.6)                        | 0.1%                       |
| 30-44                                      | 59 / 4055                               | 1.4%            | 39 (59.0)   | 50                           | 0.3 / 106                                             | 4.4                              | 4.1 (2.7-5.5)                        | 0.1%                       |
| 45-59                                      | 70 / 6402                               | 1.1%            | 55 (70.9)   | 61                           | 0.5 / 69                                              | 6.0                              | 8.6 (5.9-11.3)                       | 0.1%                       |
| 60-69                                      | 54 / 9016                               | 0.6%            | 42 (68.6)   | 52                           | 0.6 / 25                                              | 3.7                              | 14.8 (9.8-19.9)                      | 0.2%                       |
| >70                                        | 47 / 17343                              | 0.3%            | 33 (61.8)   | 35                           | 1.3 / 16                                              | 3.5                              | 21.6 (13.4-29.9)                     | --                         |
| All ages                                   | 396 / 54657                             | 0.7%            | 306 (69.8)  | 349                          | 4.5 / 546                                             | 31.5                             | 5.7                                  | 0.5%†                      |
| (% or 99% CI)                              |                                         |                 |             | (88.1%)                      |                                                       | (27.5-35.6)                      | (5.0-6.4)                            | (0.4-0.5)                  |
| <b>Total male and female, &lt;70 years</b> | 2129 / 86354                            | 2.4%            | 1609 (68.5) | 1925                         | 7.2 / 1100                                            | 171.0                            | 15.5                                 | 1.3%†                      |
| (% or 99% CI)                              |                                         |                 |             | (90.4%)                      |                                                       | (161.5-180.4)                    | (14.7-16.4)                          | (1.3-1.4)                  |
| <b>Total male and female, all ages</b>     | 2299 / 122429                           | 1.8%            | 1748 (69.0) | 2058                         | 9.8 / 1131                                            | 183.6                            | 16.2                                 | 1.3%†                      |
| (% or 99% CI)                              |                                         |                 |             | (89.5%)                      |                                                       | (173.8-193.4)                    | (15.4-17.1)                          | (1.3-1.4)                  |

**Table 1: Road traffic injury deaths in the present study and estimated national totals for 2005, by age and gender.** \*Proportion of RTI deaths compared to all deaths, weighted by state and residence (rural/urban). \*\*Percentage rural is weighted by state and residence (rural/urban). §Obtained by multiplying the United Nations estimated total deaths in 2005 by the weighted proportions. ΨAge standardized to the 2005 United Nations estimated Indian population; 99% CI shown are calculated based on weighted number of study deaths, which result in wider CI than those based on physician agreement. †Annual RTI death rate multiplied by the duration of age range, except for the lifetime risk which is calculated between 0-69 years by summation of the age specific period risks. ¶Crude death rate.

1  
2  
3 The deceased mode of transportation was described in the narratives of 2105 (92%) of the RTI  
4 deaths. National estimates for the deceased mode of transportation were calculated, as those  
5 with unknown and known modes of transportation did not appear to differ with respect to the  
6 major socio-demographic traits (Supplementary Table 1). Vulnerable road users are those  
7 without a rigid barrier protecting against traumatic forces and include pedestrians, motorcyclists,  
8 bicyclists, and three-wheelers. They constituted a majority (68%; n=124 000, 99%CI 115 000-  
9 131 000) of RTI deaths, led by pedestrians (37%; n=68 000, 62 000-73 000) and motorcyclists  
10 (20%; n=36 000, 31 000-40 000) (figure 2). Drivers and passengers of motorized four-wheelers  
11 comprised 16% (n=31 000, 27 000-35 000) of RTI deaths. By contrast, the 2005 police reports,  
12 which use a different but compatible classification system to ICD-10, recorded only 33000  
13 vulnerable road user deaths and only 9000 pedestrian deaths.[27] The most common types of  
14 vehicle to collide into the decedents were heavy transport vehicles and buses (37%; n=68 000,  
15 61 000-74 000), followed by cars and vans (15%; n=28 000, 24 000-32 000). Single-vehicle  
16 incidents comprised 9% of deaths (n=17 000, 14 000-20 000). The most frequent combinations,  
17 resulting in 23% (n=42 000, 37 000-47 000) of RTI deaths, were collisions of heavy transport  
18 vehicles or buses with pedestrians and motorcyclists (data not shown).  
19  
20  
21  
22  
23  
24  
25  
26  
27  
28  
29  
30  
31  
32  
33  
34  
35  
36  
37  
38  
39

40 The place and timing of death were described in the narratives of 1733 (75%) and 1596 (69%)  
41 of the RTI deaths respectively (figure 2; see supplementary table 1 for a summary of missing  
42 data from the narratives with respect to deceased characteristics). For these narratives, only the  
43 study proportion and not national estimates were made. Most RTI deaths occurred at the scene  
44 of collision (58%, 1005/1733) or instantly, defined as within 5 minutes (55%, 883/1596). Only 3%  
45 (45/1733) were labeled as potentially avertable with better pre-hospital transport as they  
46 occurred on scene but not instantly. Another 35% of deaths occurred en route (7%, 124/1733) or  
47 in hospital (28%, 481/1733).  
48  
49  
50  
51  
52  
53  
54  
55  
56  
57  
58  
59  
60

1  
2  
3 Injuries sustained by the deceased were reported from 1124 narratives (49%). Head injuries  
4 were the most commonly reported (62%, 691/1124), of which 76% (524/691) were reported as  
5 isolated head injuries (figure 3). A greater percentage of motorcyclists (78%, 188/241) had head  
6 injuries reported compared to non-motorcyclists (57%, 457/807). After adjusting for age, sex,  
7 rural/urban, neighbourhood asset, and education, bicyclists and motorcyclists were more likely  
8 to have head injuries reported compared to non-vulnerable road users (adjusted OR 1.7, 1.2-  
9 2.5) (supplementary table 2).  
10  
11  
12  
13  
14  
15  
16  
17  
18  
19

20 Compared to non-pedestrian RTI deaths, pedestrian deaths occurred to those who had less  
21 education (or in the case of children age <15 years, have less educated parents) (adjusted OR  
22 2.9, 99%CI 2.0-4.2), lived in poorer neighbourhoods (1.7, 1.1-2.5), were children or elderly  
23 adults (<15 years: 2.9, 1.8-4.5; >59 years: 1.7, 1.2-2.4), were female (1.5, 1.2-2.2), and lived in  
24 urban areas (1.5, 1.1-2.2) (table 2). If pedestrian deaths had the same proportion of secondary  
25 or higher education as non-pedestrian RTI deaths, there would be 406/825 (49%) fewer  
26 pedestrian deaths, corresponding to approximately 33 000 deaths nationally in 2005. The  
27 corresponding attributable proportion for living in richer versus poorer neighbourhoods would be  
28 265/825 (32%) or approximately 22 000 deaths nationally. Within the narratives we could code,  
29 there were no differences between pedestrians and non-pedestrian RTI deaths in timing of  
30 death, place of death, reported injuries, or reported routine use of alcohol or smoking (data not  
31 shown).  
32  
33  
34  
35  
36  
37  
38  
39  
40  
41  
42  
43  
44  
45  
46  
47  
48  
49  
50  
51  
52  
53  
54  
55  
56  
57  
58  
59  
60

|                                          | Pedestrian /<br>Non-Pedestrian<br>Total=825/1280 | Adjusted OR^<br>(99% CI) | Attributable<br>Pedestrian Deaths<br>(% of all 825<br>pedestrian deaths) |
|------------------------------------------|--------------------------------------------------|--------------------------|--------------------------------------------------------------------------|
| <b>Education*</b>                        |                                                  |                          |                                                                          |
| Secondary or higher                      | 112/382                                          | ref                      |                                                                          |
| Primary or middle                        | 248/450                                          | 1.8 (1.3-2.6)            | 110 ] 406 (49%)                                                          |
| Below primary                            | 451/423                                          | 2.9 (2.0-4.2)            |                                                                          |
| Unknown                                  | 14/25                                            | 1.6 (0.6-4.2)            | N/A                                                                      |
| <b>Neighbourhood Asset</b>               |                                                  |                          |                                                                          |
| High                                     | 137/320                                          | ref                      |                                                                          |
| Low                                      | 643/895                                          | 1.7 (1.1-2.5)            | 265 (32%)                                                                |
| Unknown                                  | 45/65                                            | 1.5 (0.8-2.8)            | N/A                                                                      |
| <b>Age in years</b>                      |                                                  |                          |                                                                          |
| 15-59 (driving ages)                     | 497/1046                                         | ref                      |                                                                          |
| <15 (children)                           | 144/74                                           | 2.9 (1.8-4.5)            | 94 ] 170 (21%)                                                           |
| >59 (elderly adults)                     | 184/160                                          | 1.7 (1.2-2.4)            |                                                                          |
| <b>Sex</b>                               |                                                  |                          |                                                                          |
| Male                                     | 621/1121                                         | ref                      |                                                                          |
| Female                                   | 204/159                                          | 1.5 (1.1-2.2)            | 68 (8%)                                                                  |
| <b>Location</b>                          |                                                  |                          |                                                                          |
| Rural                                    | 643/962                                          | ref                      |                                                                          |
| Urban                                    | 182/318                                          | 1.5 (1.1-2.2)            | 61 (7%)                                                                  |
| <b>Occupation</b>                        |                                                  |                          |                                                                          |
| Salaried / Wage Earner / Professional    | 229/517                                          | ref                      |                                                                          |
| Cultivator / Agricultural labour / Other | 162/300                                          | 0.9 (0.6-1.3)            | N/A                                                                      |
| Non-worker / Children <15 years          | 433/463                                          | 1.2 (0.9-1.6)            | N/A                                                                      |
| Unknown                                  | 1/0                                              | N/A                      | N/A                                                                      |
| <b>Routine Alcohol Use**</b>             |                                                  |                          |                                                                          |
| No                                       | 494/877                                          | ref                      |                                                                          |
| Yes                                      | 145/260                                          | 1.1 (0.7-1.5)            | N/A                                                                      |
| Unknown                                  | 42/69                                            | 1.0 (0.5-1.9)            | N/A                                                                      |

**Table 2: Characteristics of pedestrian RTI deaths and attributable proportions.** \*Education of deceased adults or, in cases of deceased children <15 years, education of respondent. \*\*Excludes 218 children. ^Odds ratios are adjusted for all other variables in this table except for alcohol use; the odds ratios for alcohol use are adjusted for all other variables in this table.

## DISCUSSION

RTI is an important cause of death in India, causing 183 600 deaths in 2005, or about 2% of all deaths.[22] Much of the deceased were men between ages 15-59 years. Males had a four-fold

1  
2  
3 higher cumulative risk of RTI death compared to females before the age of 70. Among the major  
4  
5 states, there was approximately 3-fold variation in the age-standardized RTI death rate and  
6  
7 cumulative risk for males.  
8  
9

10  
11 Our estimated number of RTI deaths is more than 50% greater than the 118 265 deaths  
12  
13 reported in the official police statistics of the National Crime Records Bureau (NCRB) in  
14  
15 2005.[27] Compared to our estimates, the extent of under-reporting of the crude death rate in  
16  
17 major states by NCRB ranged from <1% to about 80% (supplementary table 3). Existing  
18  
19 regional population-based injury surveys in India support our findings and also report higher  
20  
21 crude RTI death rates than NCRB statistics.[8, 11] Under-reporting of RTI deaths in police  
22  
23 statistics has been reported in India and other LMIC.[28-30] A study in urban India comparing  
24  
25 both hospital- and community-based RTI data to police records identified factors contributing to  
26  
27 under-reporting that included the deceased believed to be at fault, collision resulting from hit-  
28  
29 and-runs, limited police resources, and the lack of a standard police reporting protocol by  
30  
31 hospitals.[28] The factors contributing to police under-reporting, especially in rural India, require  
32  
33 further examination. Our estimated number of RTI deaths in 2005 was consistent with the WHO  
34  
35 estimate for 2004.[14] However, we observed a slightly higher male proportion (83% MDS vs.  
36  
37 77% WHO, all ages) and a higher proportion of male deaths between 15-59 years (65% MDS  
38  
39 vs. 61% WHO).  
40  
41  
42  
43  
44  
45

46  
47 Almost three-quarters of all RTI deaths in India were of pedestrians and other vulnerable road  
48  
49 users. In contrast, a much lower proportion (27%) was reported by the NCRB (figure 2). This  
50  
51 difference equated to 59 000 pedestrian and 32 000 other vulnerable road user deaths that were  
52  
53 not included in the 2005 NCRB records. Existing RTI studies based on regional surveys and  
54  
55 hospital series also reported a high proportion (>60%) of vulnerable road user deaths similar to  
56  
57 our findings.[11, 12, 30-32] Since the majority of vulnerable road users were pedestrians, our  
58  
59  
60

1  
2  
3 findings suggested that RTI deaths in individuals who were less educated, poor, female or live in  
4 urban areas may have been disproportionately excluded from the NCRB records. While poverty  
5 and education are not likely to be in the direct causal pathway of pedestrian deaths, they  
6 nonetheless point to other associated risk factors. Indeed, 55 000 pedestrian deaths in 2005  
7 (81%) was associated with lower education or living in poorer neighbourhoods compared to non-  
8 pedestrian RTI deaths. While the less educated and the poor likely travelled more often by foot,  
9 they might also be exposed to undetermined environmental (neighbourhoods with unsafe  
10 roads), biological (poor vision or decreased mobility due to poor health), and behavioral (alcohol  
11 or other substance use) risk factors for pedestrian death.[12, 33, 34] Further studies are needed  
12 to better understand pedestrian deaths in LMIC.  
13  
14  
15  
16  
17  
18  
19  
20  
21  
22  
23  
24

25  
26  
27 Over half of RTI deaths occurred instantly at the scene of collision and/or had head injury  
28 reported. These findings, together with existing RTI hospital series and regional surveys in India,  
29 make a strong argument that investments in primary and secondary prevention could potentially  
30 avert the greatest proportion of RTI deaths. To address the high proportion of instant deaths and  
31 head injuries among RTI deaths in India, specific interventions that are effective and based on  
32 studies in LMIC should be emphasized; these may include speed bumps, motorcycle helmets,  
33 and increasing fines and license suspensions for rule infractions.[33] In contrast, improving pre-  
34 hospital transport and hospital trauma care, could only potentially affect the 38% who died on  
35 scene with delayed hospital transport (3%), en route to hospital (7%), or in hospital (28%).  
36  
37  
38  
39  
40  
41  
42  
43  
44  
45  
46  
47

48  
49 Our study is the first nationally representative survey of the causes of death in India. The simple  
50 descriptive statistics provide clear evidence on the large and avertable burden from RTI,  
51 particularly among productive age adults and pedestrians. To the best of our knowledge, only  
52 one recent study in Vietnam has used similar methods to analyze RTI deaths and policy  
53 implications on a national scale.[35]  
54  
55  
56  
57  
58  
59  
60



1  
2  
3  
4  
5 Our study faced certain limitations. First, we might have misclassified certain causes of death  
6 including suicide as RTI deaths. However, the extent of misclassification should be minimal  
7 since the RHIME verbal autopsy method was shown to be robust in discerning between types of  
8 injury deaths[36] and since the immediate two-physician agreement was high for RTI  
9 deaths(89.5%, table 1). Furthermore, suicides cause about 200 000 deaths in India annually but  
10 few are due to RTI.[19] Second, since the modes of transportation, place and timing of death,  
11 and injuries sustained were extracted from layperson open-ended narratives, the data accuracy  
12 may be in question. For example with the deceased mode of transportation, the extent of  
13 misclassification (by our study) or misreporting (by NCRB) that contributed to the differences  
14 between the two sources is uncertain. With reported injuries, our findings from these narratives  
15 most likely undercounted less visible injuries (chest, abdomen, and spine) compared to highly  
16 visible injuries such as bleeding and deformity for head and extremity injuries. Nevertheless, our  
17 findings are consistent with available Indian regional surveys and hospital series on the mode of  
18 transportation[11,12,30-32,37] place and timing of death,[1,37-41] and injuries  
19 sustained.[12,37,42,43] Third, since the narrative was not designed specifically to capture RTI  
20 death characteristics, over 25% of deaths had missing data for mode of transportation, place of  
21 death, timing of death, or reported injuries (supplementary table 1). Thus, our findings for these  
22 elements extracted from the narratives may be less representative of the decedents who lived in  
23 rural or poor areas. Finally, reliable forward projection of the number of RTI deaths beyond 2005  
24 was not possible since the increase in the NCRB reported number of RTI deaths of 140% from  
25 2005 to 2011 appeared to outpace the rate of population growth.[44] As the proportion of  
26 vulnerable road user deaths remained stable during this period in the NCRB reports, we  
27 postulated that this increase represented an actual increase in RTI death totals rather than more  
28 accurate reporting. Furthermore, given the rapid economic expansion and concurrent changes  
29 in motorization including the types of vehicle sharing the road and road infrastructure,[45,46] our  
30  
31  
32  
33  
34  
35  
36  
37  
38  
39  
40  
41  
42  
43  
44  
45  
46  
47  
48  
49  
50  
51  
52  
53  
54  
55  
56  
57  
58  
59  
60



1  
2  
3 results on deceased mode of transportation, place and timing of death, and injuries sustained  
4  
5 may not reflect the current Indian scenario. An analysis of the trend from 2001-2014 is planned  
6  
7 pending ongoing data collection in the MDS.  
8  
9

10  
11 In India, RTI is a significant cause of preventable death, particularly in males of productive  
12  
13 working age and among pedestrians, bicyclists, and motorcyclist. We have shown that properly  
14  
15 designed simple verbal autopsy narratives can document the much needed surveillance data on  
16  
17 the numbers, rates, risks, and basic RTI mechanism such as modes of transportation, timing of  
18  
19 death, place of death, and injuries sustained. Our findings suggested that investment in primary  
20  
21 and secondary prevention could address a large proportion of avoidable RTI deaths.  
22  
23  
24  
25

## 26 27 **ACKNOWLEDGEMENTS**

28  
29 We thank the Office of the RGI for the ongoing productive collaboration on the MDS, C  
30  
31 Ramasundarahettige for technical assistance, M Puri and S Levitt for data extraction. The  
32  
33 opinions expressed in this article are those of the authors and do not necessarily represent  
34  
35 those of the Government of India or the RGI.  
36  
37  
38  
39

## 40 41 **COMPETING INTERESTS**

42 We declare that we have no competing interests.  
43  
44  
45

## 46 47 **FUNDING**

48  
49 This study is supported by grants from the John E Fogarty International Center of the National  
50  
51 Institutes of Health (R01-TW05991-01 and TW07939-01), the Bill & Melinda Gates Foundation  
52  
53 through the Disease Control Priorities Network Project, and the University of Toronto (to PJ); the  
54  
55 Canada Research Chair Programme (to PJ and ABN); and the Canadian Institutes of Health  
56  
57 Research Doctoral Award (to MH). The funding sources had no role in the study design; data  
58  
59  
60

1  
2  
3 collection, analysis, interpretation; writing of the manuscript; or decision to submit for publication.

4  
5 The senior author had full access to all the data in the study and had final responsibility for the  
6  
7 decision to submit this study for publication.  
8  
9

## 10 11 **AUTHOR'S CONTRIBUTION**

12  
13 PJ and the MDS Collaborators (appendix) designed, planned, the executed the MDS in close  
14  
15 collaboration with the Office of the Registrar General of India (RGI). MH and PJ performed the  
16  
17 data analysis. All authors contributed to data interpretation, revisions of the manuscript, and  
18  
19 provided final approval. PJ is the guarantor for this report.  
20  
21  
22  
23

## 24 25 **DATA SHARING STATEMENT**

26  
27 Data used in this study are the property of the Registrar General of India and the overall  
28  
29 mortality results have been published in 2009.[47] This specific analyses is produced under an  
30  
31 agreement with CGHR.  
32  
33  
34  
35  
36  
37  
38  
39  
40  
41  
42  
43  
44  
45  
46  
47  
48  
49  
50  
51  
52  
53  
54  
55  
56  
57  
58  
59  
60

## REFERENCES

- 1 Peden M, Scurfield R, Sleet D, *et al*. World report on road traffic injury prevention: World Health Organization 2004;1–244.
- 2 Chisholm D, Naci H, Hyder AA, *et al*. Cost effectiveness of strategies to combat road traffic injuries in sub-Saharan Africa and South East Asia: mathematical modelling study. *BMJ* 2012;**344**:e612.
- 3 The PLoS Medicine Editors. Preventing Road Deaths—Time for Data. *PLoS Med* 2010;**7**:e1000257.
- 4 Barffour M, Gupta S, Gururaj G, *et al*. Evidence-based road safety practice in India: assessment of the adequacy of publicly available data in meeting requirements for comprehensive road safety data systems. *Traffic Inj Prev* 2012;**13 Suppl 1**:17–23.
- 5 Kopits E, Cropper ML. *Traffic fatalities and economic growth*. World Bank Development Research Group Environment and Infrastructure, 2003.
- 6 Sathiyasekaran BW. Population-based cohort study of injuries. *Injury* 1996;**27**:695–8.
- 7 Varghese M, Mohan D. Transportation injuries in rural Haryana, North India. *In: Proceedings of the international conference on traffic safety 2003*;326–9.
- 8 WHO. Injury Prevention and Control: An epidemiological study of injuries in the area of Municipal Corporation of Delhi. *Regional Office for South-East Asia* 2003;1–18.
- 9 Gururaj G, Suryanarayana SP. Burden and impact of injuries: Results of population-based survey. *Proceedings of the 7th world conference on injury prevention 2004*;275–6.
- 10 Dandona R. Patterns of road traffic injuries in a vulnerable population in Hyderabad, India.

- 1  
2  
3  
4  
5  
6  
7  
8  
9  
10  
11  
12  
13  
14  
15  
16  
17  
18  
19  
20  
21  
22  
23  
24  
25  
26  
27  
28  
29  
30  
31  
32  
33  
34  
35  
36  
37  
38  
39  
40  
41  
42  
43  
44  
45  
46  
47  
48  
49  
50  
51  
52  
53  
54  
55  
56  
57  
58  
59  
60
- Injury Prevention* 2006;**12**:183–8.
- 11 Dandona R, Kumar GA, Ameer MA, *et al.* Incidence and burden of road traffic injuries in urban India. *Inj Prev* 2008;**14**:354–9.
- 12 Gururaj G. Road traffic deaths, injuries and disabilities in India: current scenario. *Natl Med J India* 2008;**21**:14–20.
- 13 Garg N, Hyder A. Road traffic injuries in India: A review of the literature. *Scand J of Public Health* 2006;**34**:100–9.
- 14 World Health Organization. *The Global Burden of Disease: 2004 Update*. World Health Organization 2008.
- 15 Mathers CD, Bernard C, Moesgaard Iburg K, *et al.* Global Burden of Disease in 2002: data sources, methods, and results. Global Programme on Evidence for Health Policy Discussion Paper No. 54. World Health Organization 2003.
- 16 Jha P, Gajalakshmi V, Gupta PC, *et al.* Prospective Study of One Million Deaths in India: Rationale, Design, and Validation Results. *PLoS Med* 2006;**3**:e18.
- 17 Million Death Study Collaborators,. Causes of neonatal and child mortality in India: a nationally representative mortality survey. *Lancet* 2010;**376**:1853–60.
- 18 Dikshit R, Gupta PC, Ramasundarahettige C, *et al.* Cancer mortality in India: a nationally representative survey. *Lancet* 2012;**379**:1807–16.
- 19 Patel V, Ramasundarahettige C, Vijayakumar L, *et al.* Suicide mortality in India: a nationally representative survey. *Lancet* 2012;**379**:2343–51.
- 20 Sinha DN, Dikshit R, Kumar R, *et al.* Prospective Study of Million Deaths in India: Technical

- document no VIII: Health care professional's manual for assigning causes of death based on RHIME household reports. RGI-CGHR, University of Toronto. 2011.<http://www.cghr.org/mds> (accessed 1 Aug2012).
- 21 WHO. *International Statistical Classification of Diseases and Related Health Problems, ICD-10: Three Volume Set*. World Health Organization 2010.
- 22 United Nations Populations Division. World population prospects (2008 revision). 2009.<http://www.un.org/esa/population/publications/wpp2008/> (accessed 2 July 2011).
- 23 Mari Bhat PN. Completeness of India's sample registration system: an assessment using the general growth balance method. *Popul Stud* 2002;**56**:119–34.
- 24 Sivanandan V. *An assessment of the completeness of death registration in India over the periods 1975-1978 and 1996-1999 under the generalized population model: an analysis based on SRS data*. Mumbai: International Institute for Population Sciences2004.
- 25 Jha P, Kumar R, Khera A, *et al*. HIV mortality and infection in India: estimates from nationally representative mortality survey of 1.1 million homes. *BMJ* 2010;**340**:c621.
- 26 Dhingra N, Jha P, Sharma VP, *et al*. Adult and child malaria mortality in India: a nationally representative mortality survey. *Lancet* 2010;**376**:1768–74.
- 27 National Crime Records Bureau. *Accidental Deaths and Suicides in India, 2005*. Ministry of Home Affairs, Government of India2005.
- 28 Dandona R, Kumar GA, Ameer MA, *et al*. Under-reporting of road traffic injuries to the police: results from two data sources in urban India. *Inj Prev* 2008;**14**:360–5.
- 29 Alcorn T. Uncertainty clouds China's road-traffic fatality data. *Lancet* 2011;**378**:305–6.

- 1  
2  
3 30 Naci H, Chisholm D, Baker TD. Distribution of road traffic deaths by road user group: a  
4 global comparison. *Inj Prev* 2009;**15**:55–9.  
5  
6  
7  
8  
9 31 Mohan D. *The road ahead: Traffic injuries and fatalities in India*. Transportation research  
10 and injury prevention programme, Indian Institute of Technology, Delhi2004.  
11  
12  
13 32 Mohan D. Traffic safety and health in Indian cities. *Journal of Transport and Infrastructure*  
14 2002;**9**:79–94.  
15  
16  
17  
18  
19 33 Norton R, Hyder A, Bishai D, *et al*. Unintentional Injuries. In: *Disease Control Priorities in*  
20 *Developing Countries*. Oxford University Press, USA2006.  
21  
22  
23  
24 34 Grimm M, Treibich C. Determinants of road traffic crash fatalities across Indian states.  
25 *Health Econ* Published Online First: 30 August 2012. doi:10.1002/hec.2870  
26  
27  
28  
29  
30 35 Ngo AD, Rao C, Phuong Hoa N, *et al*. Road traffic related mortality in Vietnam: Evidence  
31 for policy from a national sample mortality surveillance system. *BMC Public Health*  
32 2012;**12**:561.  
33  
34  
35  
36  
37 36 Hsiao M, Morris SK, Bassani DG, *et al*. Factors Associated with Physician Agreement on  
38 Verbal Autopsy of over 11500 Injury Deaths in India. *PLoS ONE* 2012;**7**:e30336.  
39  
40  
41  
42 37 Singh H, Dhatarwal SK. Pattern and distribution of injuries in fatal road traffic accidents in  
43 Rohtak (Haryana). *Journal of Indian Academy of Forensic Medicine* 2004;**26**:20–3.  
44  
45  
46  
47  
48 38 Dandona R, Mishra A. Deaths due to road traffic crashed in Hyderabad city in India: need  
49 for strengthening surveillance. *Natl Med J India* 2004;**17**:74–9.  
50  
51  
52  
53 39 Sahdev P, Lacqua MJ, Singh B, *et al*. Road traffic fatalities in Delhi: causes, injury patterns,  
54 and incidence of preventable deaths. *Accident Analysis & Prevention* 1994;**26**:377–84.  
55  
56  
57  
58  
59  
60

- 1  
2  
3 40 Bhattacharjee J, Bora D, Sharma RS, *et al.* Unnatural deaths in Delhi during 1991. *Med Sci*  
4  
5 *Law* 1996;**36**:194–8.  
6  
7  
8  
9 41 Jain A, Menezes RG, Kanchan T, *et al.* Two wheeler accidents on Indian roads--a study  
10  
11 from Mangalore, India. *J Forensic Leg Med* 2009;**16**:130–3.  
12  
13  
14 42 Gururaj G, Shastry KVR, Chandramouli AB, *et al.* *Traumatic brain injury*. Bangalore:  
15  
16 National Institute of Mental Health and Neuro Sciences, 2005.  
17  
18  
19 43 Colohan AR, Alves WM, Gross CR, *et al.* Head injury mortality in two centers with different  
20  
21 emergency medical services and intensive care. *J Neurosurg Pediatrics* 1989;**71**:202–7.  
22  
23  
24 44 National Crime Records Bureau. *Accidental Deaths and Suicides in India, 2011*. Ministry of  
25  
26 Home Affairs, Government of India 2011.  
27  
28  
29  
30 45 Transport Research Wing, Ministry of Road Transport & Highways. Basic Road Statistics of  
31  
32 India. Government of India 2012.  
33  
34  
35 46 Transport Research Wing, Ministry of Road Transport & Highways. Road Transport Year  
36  
37 Book (2009-10 & 2010-11). Government of India 2012.  
38  
39  
40 47 Registrar General of India and Centre for Global Health Research. *Causes of Death in*  
41  
42 *India, 2001-2003: Sample Registration System*. Government of India 2009.  
43  
44  
45  
46  
47  
48  
49  
50  
51  
52  
53  
54  
55  
56  
57  
58  
59  
60

## FIGURE LEGENDS

### Figure 1: Road traffic injury deaths, age-standardized death rate, and cumulative risk (age 0-69 years) across states and regions of India, by gender.

Death rates are standardized to the 2005 United Nations estimated Indian population. Symbol size is proportional to sample size. Northeast states include Sikkim, Arunachal Pradesh, Nagaland, Manipur, Mizoram, Tripura, and Meghalaya. Total estimates include the 80 male and 19 female deaths from Pondicherry, Chandigarh, Uttarakhand, Dadra & Nagar Haveli, A&N Islands, Daman & Diu, Lakshadweep, and Goa. CHT=Chhatisgarh.

### Figure 2: Deceased mode of transportation, place of death, and timing of death.

(A) Deceased mode of transportation in present study compared to National Crime Records Bureau 2005 Report. Shaded line represents vulnerable road users (defined as road users without a rigid barrier protecting against traumatic forces, i.e. pedestrian, bicyclist, motorcyclist, and three wheelers). Percentages from present study are weighted by state and rural/urban residence. T=estimated/reported number of deaths in 2005 (in thousands). (B) Place of death and (C) timing of death based on verbal autopsy narratives. Shaded lines represent deaths that are reported as occurring at the scene of collision or occurring instantly (defined as within 5 minutes).

### Figure 3: Reported injuries from 1124 verbal autopsy narratives (49% of all 2299 RTI deaths).

Percentages refer to those in each row with given injury (columns). \*Values in bold denote two by two chi square tests with  $p < 0.05$  (excluding unknowns). Abdominal and spinal injuries were also reported but not shown due to small numbers (61 and 25 cases, respectively).



**LIST OF ACRONYMS**

|        |                                                                                                             |
|--------|-------------------------------------------------------------------------------------------------------------|
| CI     | Confidence interval                                                                                         |
| ICD-10 | International Statistical Classification of Diseases and Related Health Problems, 10 <sup>th</sup> Revision |
| LMIC   | Low- and middle-income countries                                                                            |
| MDS    | Million Death Study                                                                                         |
| NCRB   | National Crime Records Bureau                                                                               |
| RGI    | Registrar General of India                                                                                  |
| RTI    | Road traffic injury                                                                                         |
| SRS    | Sample registration system                                                                                  |
| UN     | United Nations                                                                                              |
| WHO    | World Health Organization                                                                                   |
