# Supplementary material for: Road traffic injury mortality and its mechanisms in India: nationally representative mortality survey of 1.1 million homes
Source: HighWire-hosted journal article supplement (doi:10.1136/bmjopen-2013-002621), 2013-08-01
Supplement: bmjopen-2013-002621supp.pdf [file bmjopen-2013-002621supp.pdf]

|                            | Narrative section |                      |       | Timing of Death  |                      |       | Place of Death   |                      |       | Deceased Mode of Transportation |                      |       | Injury Reported  |                      |       |
|----------------------------|-------------------|----------------------|-------|------------------|----------------------|-------|------------------|----------------------|-------|---------------------------------|----------------------|-------|------------------|----------------------|-------|
|                            | Missing<br>n (%)  | Not missing<br>n (%) | p     | Missing<br>n (%) | Not missing<br>n (%) | p     | Missing<br>n (%) | Not missing<br>n (%) | p     | Missing<br>n (%)                | Not missing<br>n (%) | p     | Missing<br>n (%) | Not missing<br>n (%) | p     |
| <b>all RTI (n=2299)</b>    | 142 (6.2)         | 2157 (93.8)          |       | 703 (30.6)       | 1596 (69.4)          |       | 566 (24.6)       | 1733 (75.4)          |       | 194 (8.4)                       | 2105 (91.6)          |       | 1175 (51.1)      | 1124 (48.9)          |       |
| <b>age</b>                 |                   |                      |       |                  |                      |       |                  |                      |       |                                 |                      |       |                  |                      |       |
| <20 years                  | 12 (2.9)          | 402 (97.1)           | 0.002 | 106 (25.6)       | 308 (74.4)           | 0.015 | 90 (21.7)        | 324 (78.0)           | 0.133 | 37 (8.9)                        | 377 (91.1)           | 0.687 | 199 (48.1)       | 215 (51.9)           | 0.172 |
| ≥20 years                  | 130 (6.9)         | 1755 (93.1)          |       | 597 (31.7)       | 1288 (68.3)          |       | 476 (25.3)       | 1409 (75.0)          |       | 157 (8.3)                       | 1728 (91.7)          |       | 976 (51.8)       | 909 (48.2)           |       |
| <b>sex</b>                 |                   |                      |       |                  |                      |       |                  |                      |       |                                 |                      |       |                  |                      |       |
| male                       | 118 (6.2)         | 1785 (93.8)          | 0.916 | 582 (30.6)       | 1321 (69.4)          | 0.991 | 461 (24.2)       | 1442 (75.8)          | 0.336 | 161 (8.5)                       | 1742 (91.5)          | 0.934 | 972 (51.1)       | 931 (48.9)           | 0.946 |
| female                     | 24 (6.1)          | 372 (93.9)           |       | 121 (30.6)       | 275 (69.4)           |       | 105 (26.5)       | 291 (73.5)           |       | 33 (8.3)                        | 363 (91.7)           |       | 203 (51.3)       | 193 (48.7)           |       |
| <b>location</b>            |                   |                      |       |                  |                      |       |                  |                      |       |                                 |                      |       |                  |                      |       |
| rural                      | 125 (7.2)         | 1623 (92.9)          | 0.001 | 559 (32.0)       | 1189 (68.0)          | 0.009 | 456 (26.1)       | 1292 (73.9)          | 0.004 | 143 (8.2)                       | 1605 (91.8)          | 0.429 | 896 (51.3)       | 852 (48.7)           | 0.799 |
| urban                      | 17 (3.1)          | 534 (96.9)           |       | 144 (26.1)       | 407 (73.9)           |       | 110 (20.0)       | 441 (80.0)           |       | 51 (9.3)                        | 500 (90.7)           |       | 279 (50.6)       | 272 (49.4)           |       |
| <b>neighbourhood asset</b> |                   |                      |       |                  |                      |       |                  |                      |       |                                 |                      |       |                  |                      |       |
| low                        | 126 (7.5)         | 1548 (92.5)          | 0.001 | 552 (33.0)       | 1122 (67.0)          | 0.000 | 451 (26.9)       | 1223 (73.1)          | 0.001 | 136 (8.1)                       | 1538 (91.9)          | 0.468 | 883 (52.8)       | 791 (47.3)           | 0.057 |
| high                       | 16 (3.2)          | 487 (96.8)           |       | 121 (24.1)       | 382 (75.9)           |       | 97 (19.3)        | 406 (80.7)           |       | 46 (9.2)                        | 457 (90.9)           |       | 241 (47.9)       | 262 (52.1)           |       |
| missing                    | 0 (0.0)           | 122 (100.0)          |       | 30 (24.6)        | 92 (75.4)            |       | 18 (14.8)        | 104 (85.3)           |       | 12 (9.8)                        | 110 (90.2)           |       | 51 (41.8)        | 71 (58.2)            |       |
| <b>education</b>           |                   |                      |       |                  |                      |       |                  |                      |       |                                 |                      |       |                  |                      |       |
| below primary              | 38 (4.0)          | 916 (96)             | 0.000 | 289 (30.3)       | 665 (69.7)           | 0.894 | 230 (24.1)       | 724 (75.9)           | 0.719 | 80 (8.4)                        | 874 (91.6)           | 0.757 | 468 (49.1)       | 486 (50.9)           | 0.094 |
| primary and above          | 100 (7.7)         | 1196 (92.3)          |       | 396 (30.6)       | 900 (69.4)           |       | 321 (24.8)       | 975 (75.2)           |       | 104 (8.0)                       | 1192 (92.0)          |       | 682 (52.6)       | 614 (47.4)           |       |
| missing                    | 4 (8.2)           | 45 (91.8)            |       | 18 (36.7)        | 31 (63.3)            |       | 15 (30.6)        | 34 (69.4)            |       | 10 (20.4)                       | 39 (79.6)            |       | 25 (51.0)        | 24 (49.0)            |       |
| <b>occupation</b>          |                   |                      |       |                  |                      |       |                  |                      |       |                                 |                      |       |                  |                      |       |
| non-worker                 | 60 (8.1)          | 679 (91.9)           | 0.006 | 243 (32.9)       | 496 (67.1)           | 0.094 | 205 (27.7)       | 534 (72.3)           | 0.016 | 60 (8.1)                        | 679 (91.9)           | 0.701 | 381 (51.6)       | 358 (48.4)           | 0.757 |
| worker                     | 81 (5.2)          | 1478 (94.8)          |       | 459 (29.4)       | 1100 (70.6)          |       | 360 (23.1)       | 1199 (76.9)          |       | 134 (8.6)                       | 1425 (91.4)          |       | 793 (50.9)       | 766 (49.1)           |       |
| missing                    | 1 (100.0)         | 0 (0.0)              |       | 1 (100.0)        | 0 (0.0)              |       | 1 (100.0)        | 0 (0.0)              |       | 0 (0.0)                         | 1 (100.0)            |       | 1 (100.0)        | 0 (0.0)              |       |

**Supplementary Table 1: Summary of missing data.** There are no missing values for age, sex, and location in the study population. The chi square test was used to determine the p values and excluded deaths with missing neighbourhood asset, education, or occupation.

| Deceased Mode of Transportation | Timing of Death was Instant |             |         | Place of Death was Prehospital |             |         | Head Injury was Reported |             |                 |
|---------------------------------|-----------------------------|-------------|---------|--------------------------------|-------------|---------|--------------------------|-------------|-----------------|
|                                 | n (%)                       | Adjusted OR | 99% CI  | n (%)                          | Adjusted OR | 99% CI  | n (%)                    | Adjusted OR | 99% CI          |
| non-vulnerable road users       | 170 (58.6)                  | ref         | --      | 223 (69.5)                     | ref         | --      | 125 (31.5)               | ref         | --              |
| vulnerable road users:          |                             |             |         |                                |             |         |                          |             |                 |
| pedestrian                      | 338 (58.5)                  | 1.1         | 0.7-1.7 | 425 (69.1)                     | 1.1         | 0.7-1.7 | 192 (24.9)               | 0.8         | 0.5-1.1         |
| bicyclist & motorcyclist        | 245 (52.0)                  | 0.8         | 0.5-1.1 | 306 (59.2)                     | 0.6         | 0.4-1.0 | 256 (43.5)               | <b>1.7*</b> | <b>1.2-2.5*</b> |
| three wheelers & animal riders  | 93 (56.4)                   | 0.9         | 0.5-1.6 | 117 (67.6)                     | 0.9         | 0.5-1.7 | 72 (33.0)                | 1.2         | 0.7-1.9         |
| unknown                         | 37 (40.2)                   | 0.5         | 0.3-1.0 | 55 (51.4)                      | 0.5         | 0.3-1.0 | 46 (25.1)                | 0.8         | 0.5-1.4         |

**Supplementary Table 2: Association between deceased mode of transportation and the timing of death, place of death, and head injuries reported.** Odds ratios are adjusted for deceased's age, sex, rural/urban, neighbourhood asset, and education. \*Value in bold denote statistically significant difference between comparison groups.

|                      | 2005 UN<br>population<br>estimates (in '000) | Number of RTI<br>deaths in 2005* |       | Crude RTI Death<br>Rate in 2005<br>(per 100,000)* |      | % Under-reporting of<br>Crude RTI Death<br>Rate |
|----------------------|----------------------------------------------|----------------------------------|-------|---------------------------------------------------|------|-------------------------------------------------|
|                      |                                              | MDS                              | NCRB  | MDS                                               | NCRB |                                                 |
| Northeast States     | 13211                                        | 3610                             | 724   | 27.3                                              | 5.5  | 79.9                                            |
| Punjab               | 26455                                        | 7380                             | 1622  | 27.9                                              | 6.1  | 78.0                                            |
| Bihar + Jharkhand    | 122181                                       | 13172                            | 3430  | 10.8                                              | 2.8  | 74.0                                            |
| Uttar Pradesh        | 186591                                       | 33287                            | 9860  | 17.8                                              | 5.3  | 70.4                                            |
| Jammu & Kashmir      | 11120                                        | 2335                             | 857   | 21.0                                              | 7.7  | 63.3                                            |
| Other States         | 14121                                        | 4037                             | 1589  | 28.6                                              | 11.3 | 60.6                                            |
| Assam                | 29150                                        | 3277                             | 1456  | 11.2                                              | 5.0  | 55.6                                            |
| West Bengal          | 86499                                        | 9363                             | 4364  | 10.8                                              | 5.0  | 53.4                                            |
| Madhya Pradesh + CDH | 90568                                        | 15726                            | 7686  | 17.4                                              | 8.5  | 51.1                                            |
| Haryana              | 23688                                        | 6128                             | 3282  | 25.9                                              | 13.9 | 46.4                                            |
| Orissa               | 39485                                        | 5083                             | 2895  | 12.9                                              | 7.3  | 43.0                                            |
| Kerala               | 33785                                        | 5051                             | 3161  | 15.0                                              | 9.4  | 37.4                                            |
| Maharashtra          | 106386                                       | 16638                            | 10613 | 15.6                                              | 10.0 | 36.2                                            |
| Rajasthan            | 63375                                        | 9237                             | 6793  | 14.6                                              | 10.7 | 26.5                                            |
| Gujarat              | 55926                                        | 6987                             | 5264  | 12.5                                              | 9.4  | 24.7                                            |
| Himachal Pradesh     | 6559                                         | 1077                             | 854   | 16.4                                              | 13.0 | 20.7                                            |
| Karnataka            | 57141                                        | 8172                             | 6876  | 14.3                                              | 12.0 | 15.9                                            |
| Delhi                | 16289                                        | 2161                             | 2023  | 13.3                                              | 12.4 | 6.4                                             |
| Tamil Nadu           | 66154                                        | 14808                            | 13961 | 22.4                                              | 21.1 | 5.7                                             |
| Andhra Pradesh       | 81934                                        | 10991                            | 10944 | 13.4                                              | 13.4 | 0.4                                             |
| Total                | 1130618                                      | 178520                           | 98254 | 15.8                                              | 8.7  | 45.0                                            |

**Supplementary Table 3: Comparison between present study (MDS) estimates and National Crime Records Bureau (NCRB) police reports of the number of RTI deaths and crude death rate, by state.** \*Excludes railroad deaths since NCRB does not publish state-level railroad death figures. Northeast States include Sikkim, Arunachal Pradesh, Nagaland, Manipur, Mizoram, Tripura, and Meghalaya. Other States include Pondicherry, Chandigarh, Uttaranchal, Dadra & Nagar Haveli, A & N Islands, Daman & Diu, Lakshadweep, and Goa. CDH = Chhatisgarh. % under reporting = (MDS death rate - NCRB death rate) / MDS death rate \*100%.

## **MILLION DEATH STUDY COLLOBORATORS**

### **Indian Academic Partners (in alphabetical order):**

1. Department of Community Medicine Gujarat Medical College, Ahmedabad: DV Bala, P Seth, KN Trivedi
2. Department of Community Medicine Kolkatta Medical College, Kolkatta: SK Roy
3. Department of Community Medicine Regional Institute of Medical Sciences, Imphal: L Usharani
4. Department of Community Medicine S.C.B. Medical College Cuttack, Orissa: Dr. B Mohapatra
5. Department of Community Medicine SMS Medical College Jaipur: AK Bharadwaj, R Gupta
6. Epidemiological Research Center, Chennai: V Gajalakshmi, CV Kanimozhi
7. Gandhi Medical College, Bhopal: RP Dikshit, S Sorangi
8. Healix-Seskarhia Institute of Public Health, Navi Mumbai: PC Gupta, MS Pednekar, S Sreevidya
9. Apollo Institute of Medical Sciences & Research, Hyderabad: P Bhatia
10. St. John's Academy of Health Sciences, Bangalore: A Kurpad, P Mony, M Vaz, S Srinivasan, A Shet, AS Shet, D Xavier, S Rathi, V Habbare
11. King George Medical College, Lucknow: S Awasthi
12. Najafgarh Rural Health Training Centre, Ministry of Health Government of India, New Delhi: N Dhingra, J Sudhir, I Rawat (until 2007)
13. Regional Medical Research Center, ICMR Institute, Bhubaneshwar: AS Karketta, SK Dar
14. School of Preventative Oncology, Patna: DN Sinha
15. School of Public Health Post Graduate Institute of Medical Education and Research, Chandigarh: N Kaur, R Kumar, JS Thakur
16. Tata Memorial Cancer Hospital, Mumbai: RA Badwe, RP Dikshit, M Mallath, K Panse, A Budukh

### **Lead Partners:**

1. Office of the Registrar-General India, RK Puram, New Delhi India: C Chandramouli (Registrar General of India [RGI]), RC Sethi, B Mishra (until 2012), S Jain (until 2008), DK Dey, AK Saxena, MS Thapa, N Kumar; JK Banthia and DK Sikri (former RGIs)
2. Million Death Study Coordinating Centre for Global Health Research (CGHR) Li Ka Shing Knowledge Institute, St. Michael's Hospital, Dalla Lana School of Public Health, University of Toronto, Canada: P Jha (Principal Investigator), R Kamadod, S Rathi, S Rao-Seshadri, P Rodriguez, P Sati, J Sudhir, C Ramasundarahettige, W Suraweera

### **Affiliated Partners:**

1. Indian Council of Medical Research, New Delhi India: VM Katoch (Director General or DG from 2008), NK Ganguly (DG to 2008), L Kant, B Bhattacharya, B Shah, DK Shukla
2. World Health Organisation, Geneva and SEARO Office, New Delhi: T Boerma, A Fric, S Habayeb (former WHO Representative-India), S Khanum, CD Mathers, DN Sinha, N Singh, P Singh (Deputy Regional Director)
3. Clinical Trial Service Unit and Epidemiological Studies Unit (CTSUS), University of Oxford, England: N Bhala, J Boreham, R Peto, G Whitlock
